# Supplementary material for: Naphthoquinone-derived tridentate Ru( ii ) and Os( ii ) organometallics with exceptional cytotoxicity: synthesis, characterization, stability in aqueous solution and biological in vitro evaluation
Source: Royal Society of Chemistry journal article supplement (doi:10.1039/d5dt01649e), 2026-01-01
Supplement: d5dt01649e1.pdf [file d5dt01649e1.pdf]

## Supporting Information

# Naphthoquinone-derived tridentate Ru(II) and Os(II) organometallics with exceptional cytotoxicity: Synthesis, characterization, stability in aqueous solution and biological *in vitro* evaluation

Alexander Rosner,<sup>a,b</sup> Heiko Geisler,<sup>a</sup> Michaela Hejl,<sup>a</sup> Mathias Gradl,<sup>c,d</sup> Anton A. Legin,<sup>a</sup> Alexander Roller,<sup>a</sup> Michael A. Jakupiec,<sup>a,c</sup> Petra Heffeter,<sup>c,d</sup> Walter Berger,<sup>c,d</sup> Bernhard K. Keppler,<sup>a,c</sup> Wolfgang Kandioller<sup>a,c,\*</sup>

<sup>a</sup>Institute of Inorganic Chemistry, Faculty of Chemistry, University of Vienna, Währinger Str. 42, 1090 Vienna, Austria.

<sup>b</sup>Vienna Doctoral School in Chemistry (DoSChem), Faculty of Chemistry, University of Vienna, Währinger Str. 42, 1090 Vienna, Austria.

<sup>c</sup>Research Cluster “Translational Cancer Therapy Research”, Währinger Str. 42, 1090 Vienna, Austria.

<sup>d</sup>Center for Cancer Research and Comprehensive Cancer Center, Medical University of Vienna, Austria.

\*wolfgang.kandioller@univie.ac.at, +43-1-4277-52609

## Table of Content

|     |                                        |    |
|-----|----------------------------------------|----|
| 1   | NMR Spectra .....                      | 2  |
| 2   | Mass spectra .....                     | 20 |
| 3   | X-ray crystallography data.....        | 32 |
| 4   | HPLC-MS .....                          | 56 |
| 5   | Cell Culture .....                     | 61 |
| 5.1 | Cell Viability Assay (MTT Assay) ..... | 61 |
| 5.2 | Cellular accumulation .....            | 64 |
| 5.3 | Cell Cycle Studies .....               | 64 |
| 6   | Appendix .....                         | 67 |



# 1 NMR Spectra

## 1.1.1 2-Propyl-3-hydroxynaphthalene-1,4-dione: **a**

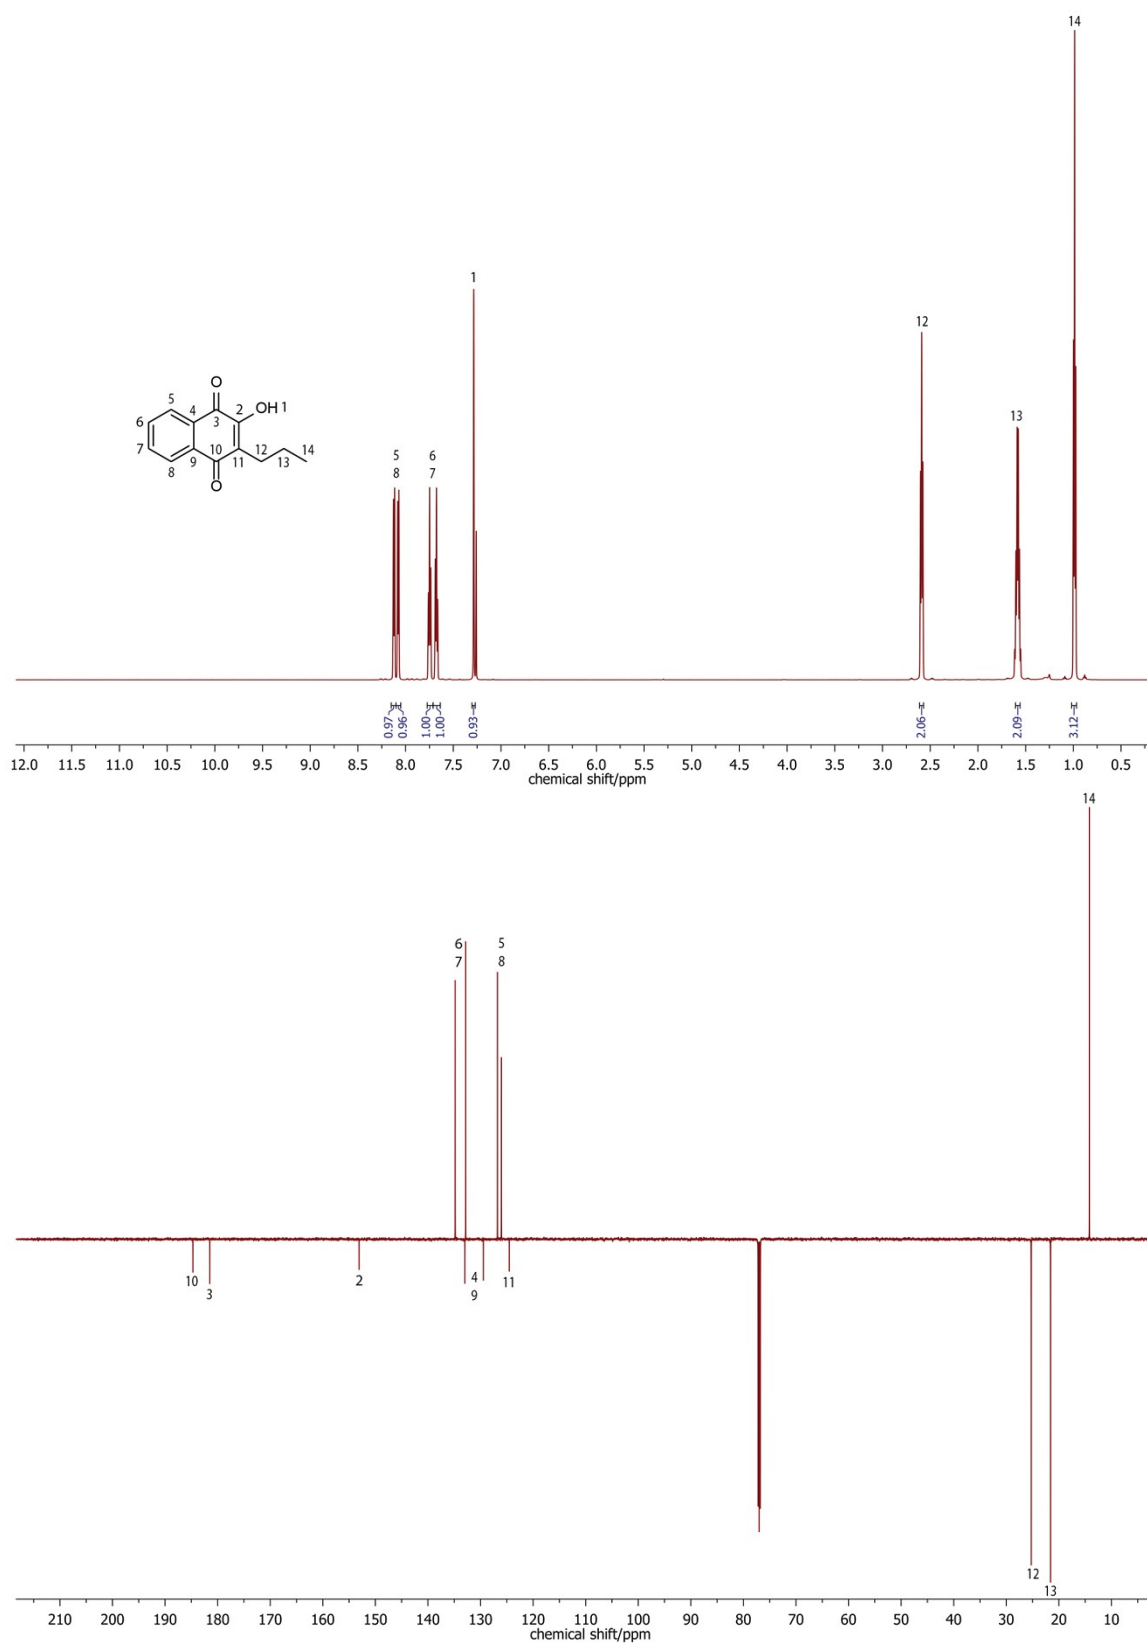

Figure S1:  $^1\text{H}$  (above) and  $^{13}\text{C}$  (below) NMR spectra of ligand **a** in  $\text{CDCl}_3$ .

### 1.1.2 2-Hydroxy-3-propylnaphthalene-1,4-dione: **b**

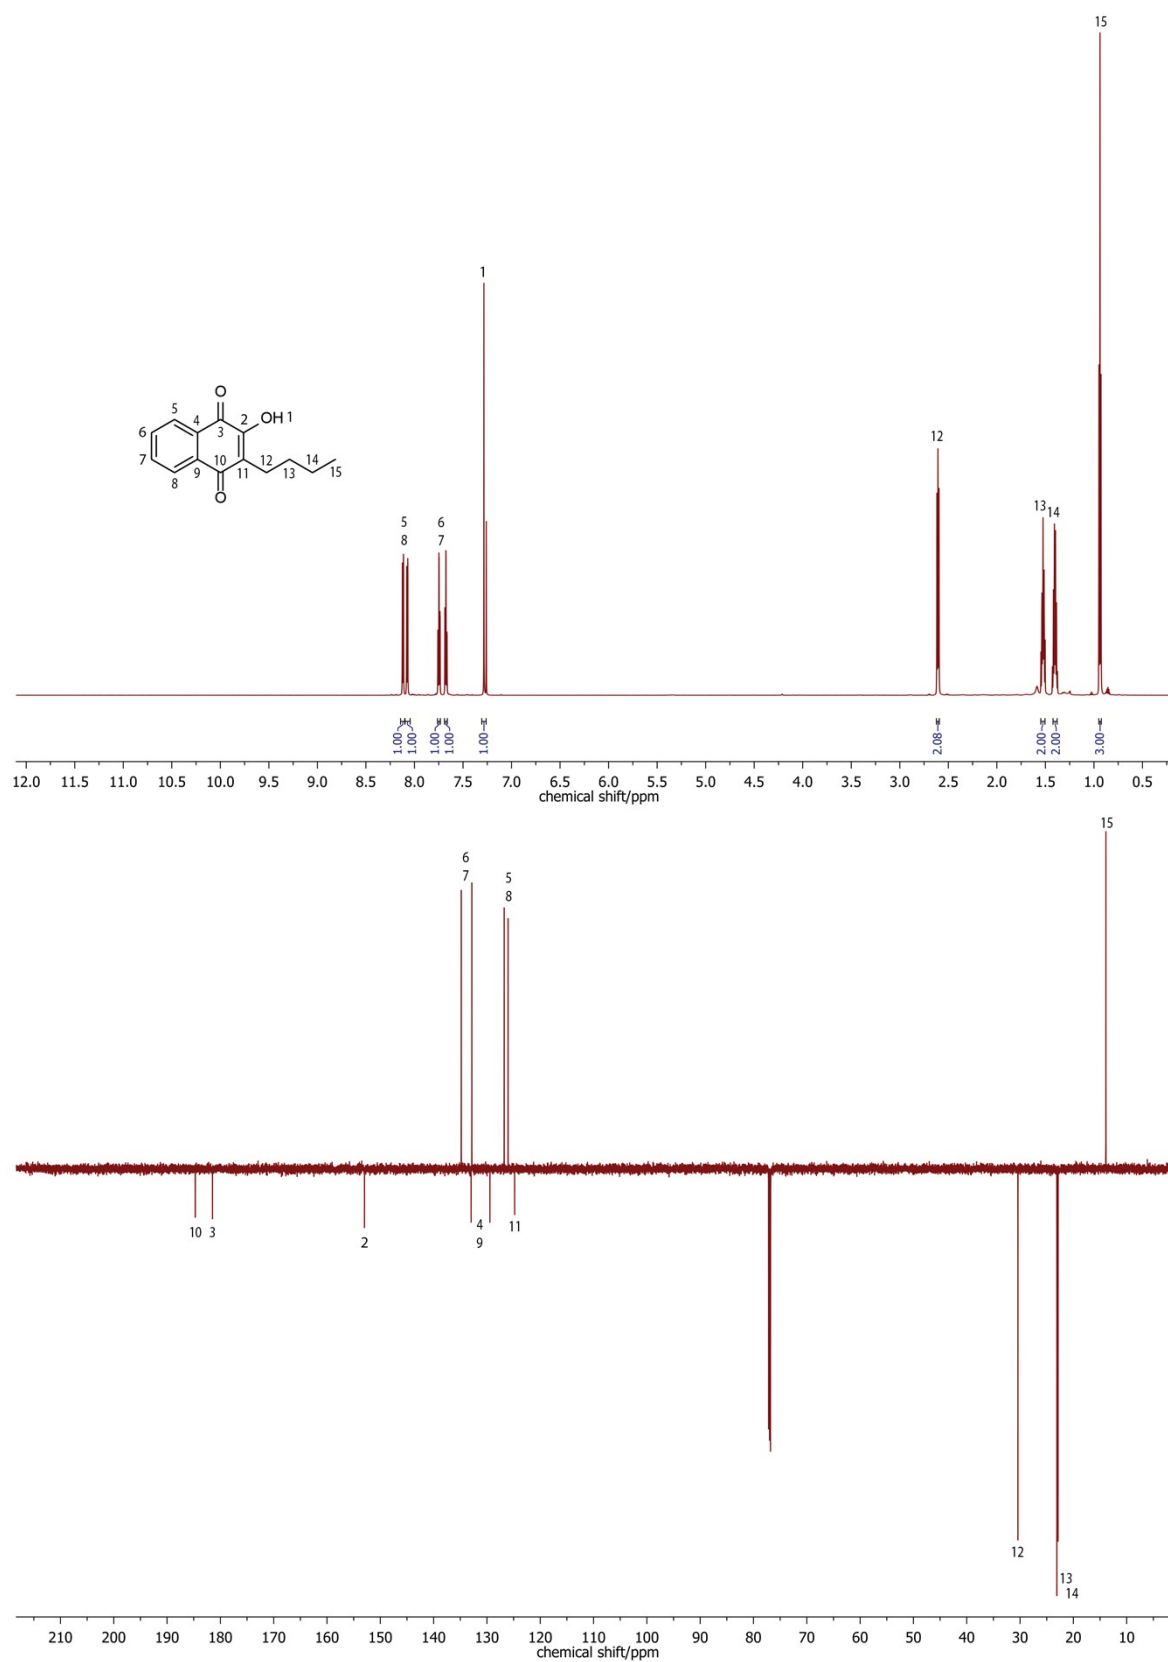

Figure S2:  $^1\text{H}$  (above) and  $^{13}\text{C}$  (below) NMR spectra of ligand **b** in  $\text{CDCl}_3$ .



### 1.1.3 2-Hydroxy-3-isobutylnaphthalene-1,4-dione: **c**

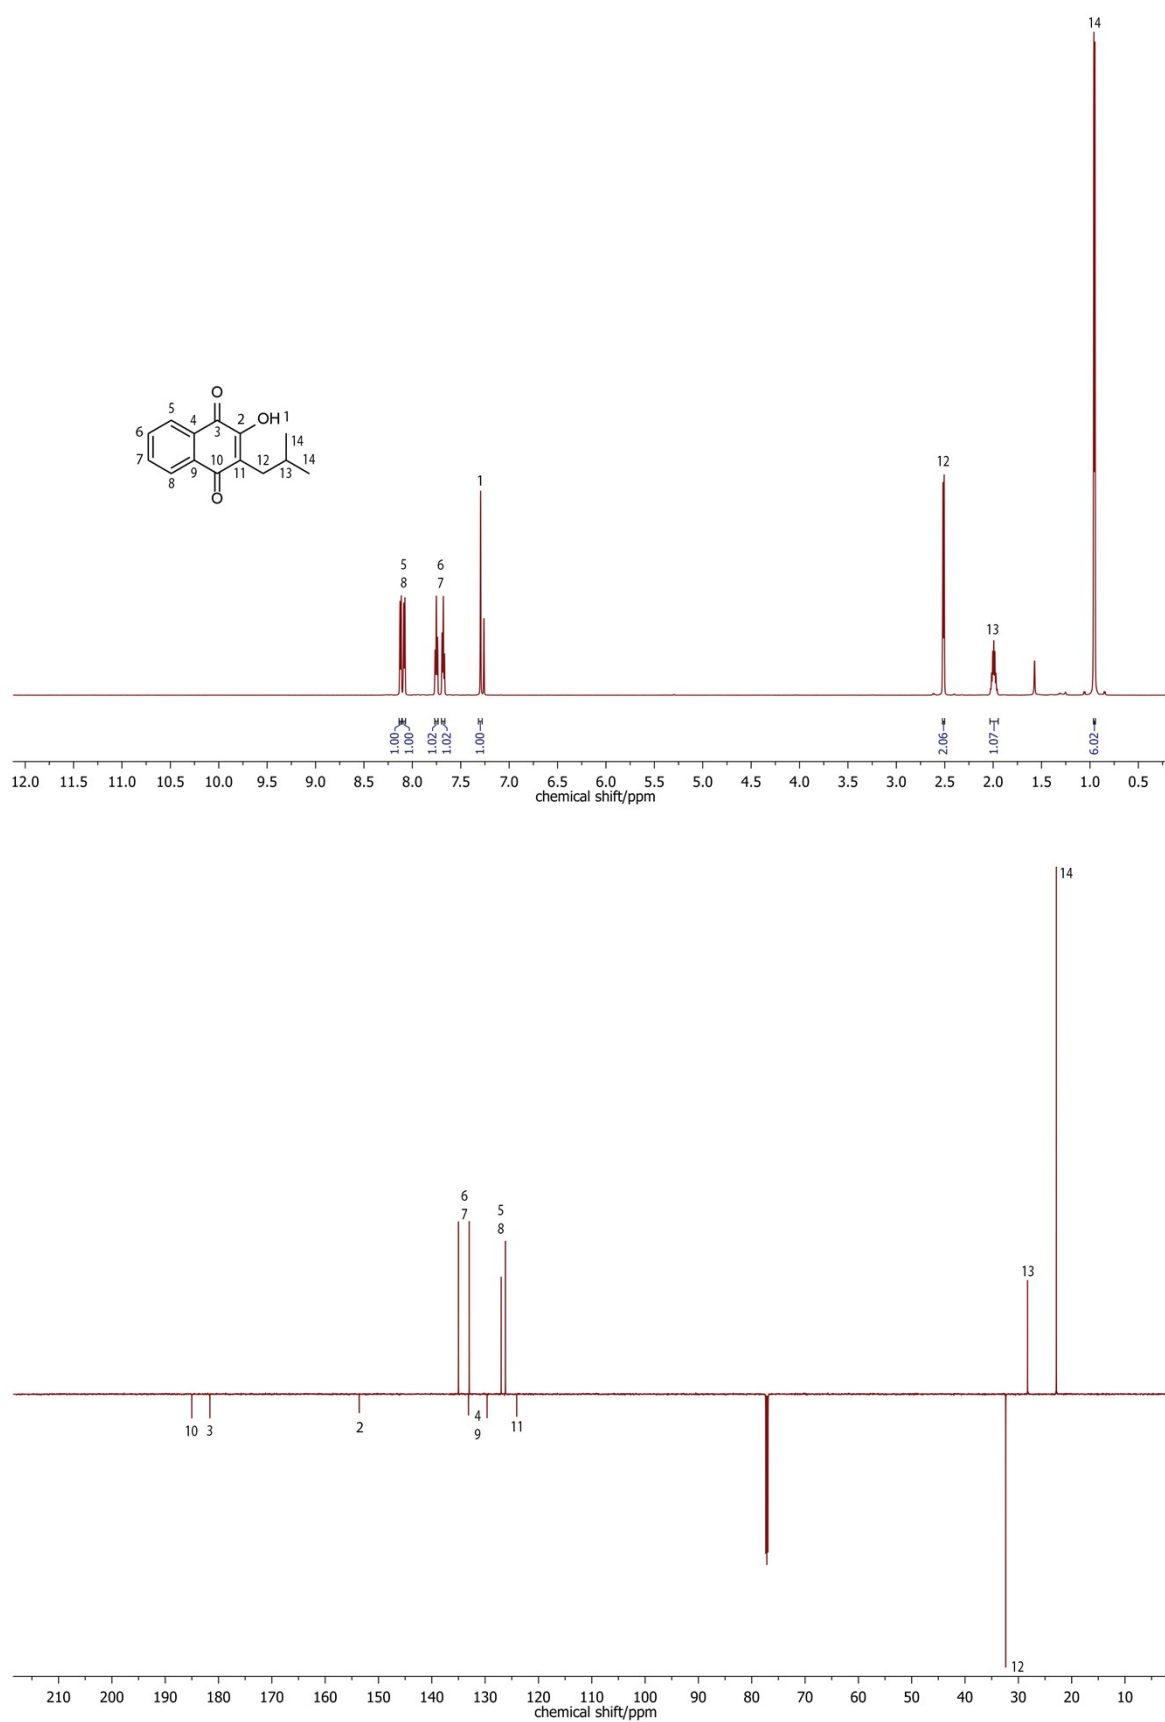

Figure S3:  $^1\text{H}$  (above) and  $^{13}\text{C}$  (below) NMR spectra of ligand **c** in  $\text{CDCl}_3$ .

### 1.1.4 2-(tert-Butyl)-3-hydroxynaphthalene-1,4-dione: **d**

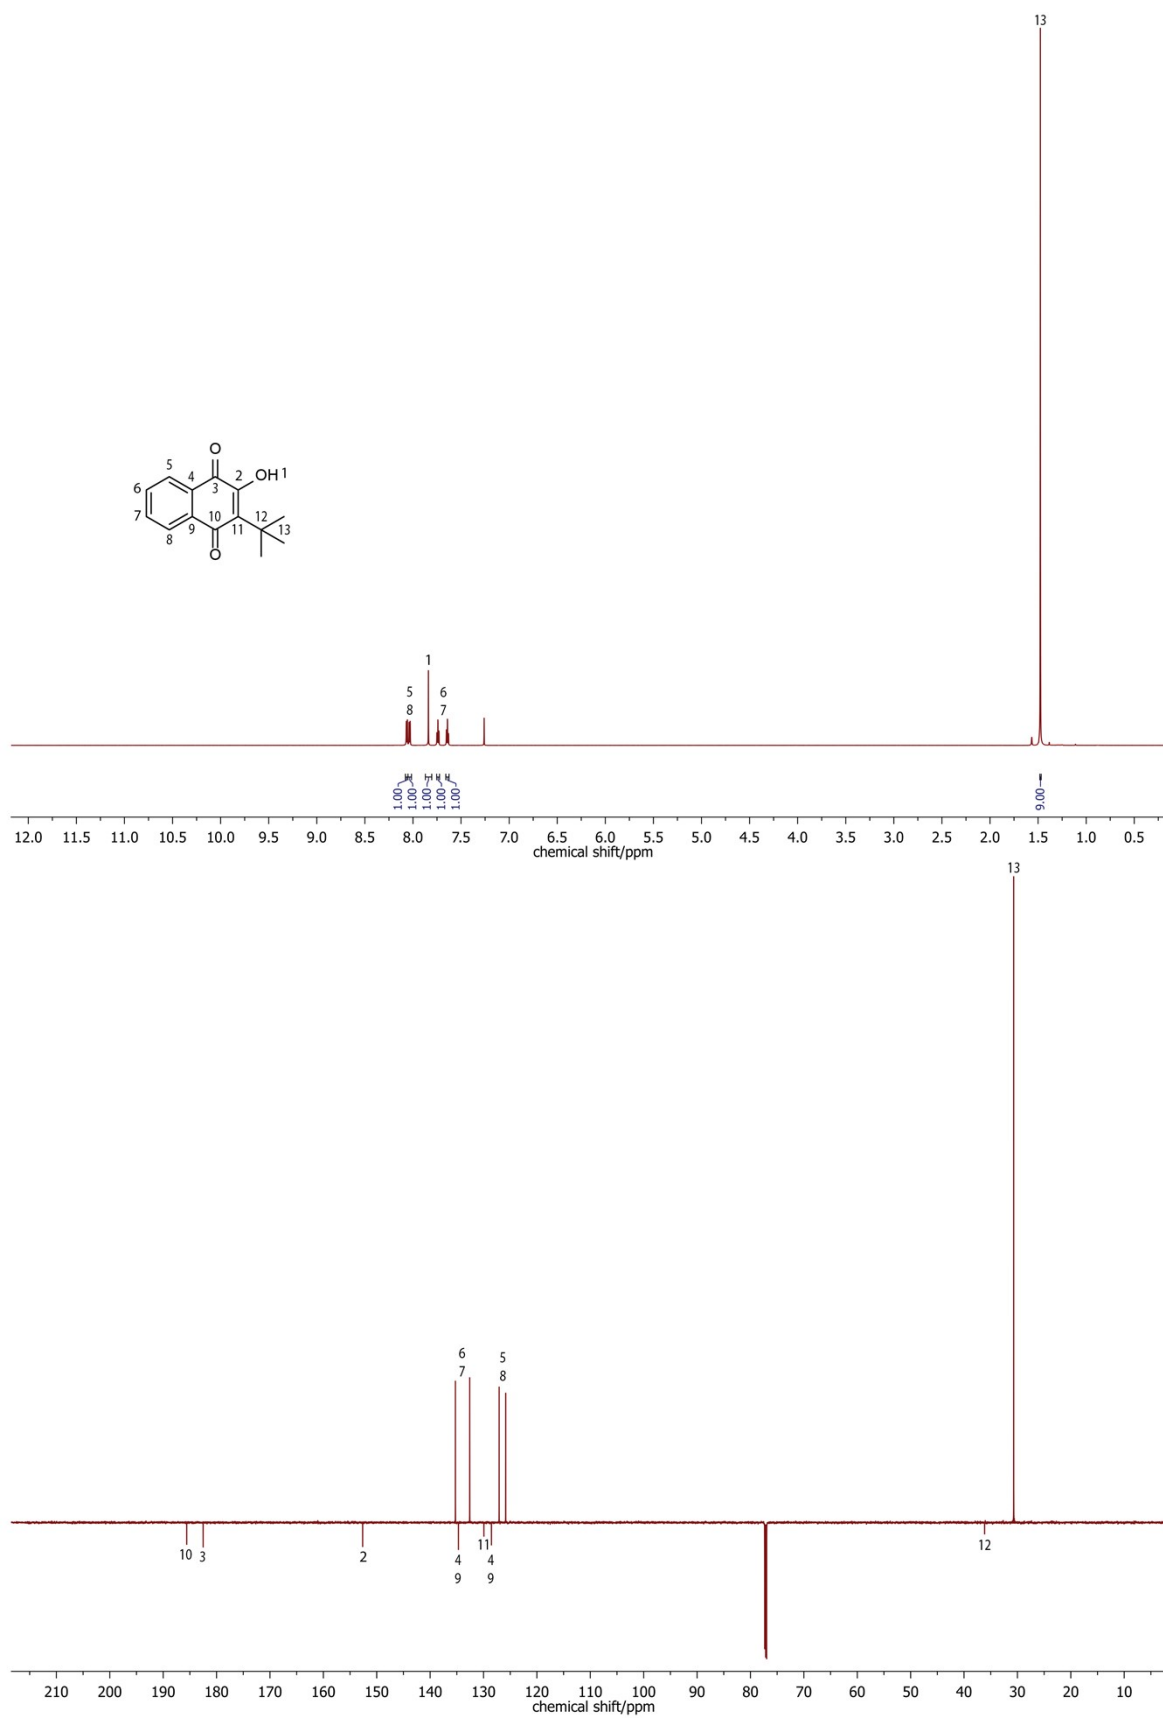

Figure S4: <sup>1</sup>H (above) and <sup>13</sup>C (below) NMR spectra of ligand **d** in CDCl<sub>3</sub>.

### 1.1.5 2-Hydroxy-3-neopentyl-naphthalene-1,4-dione: **e**

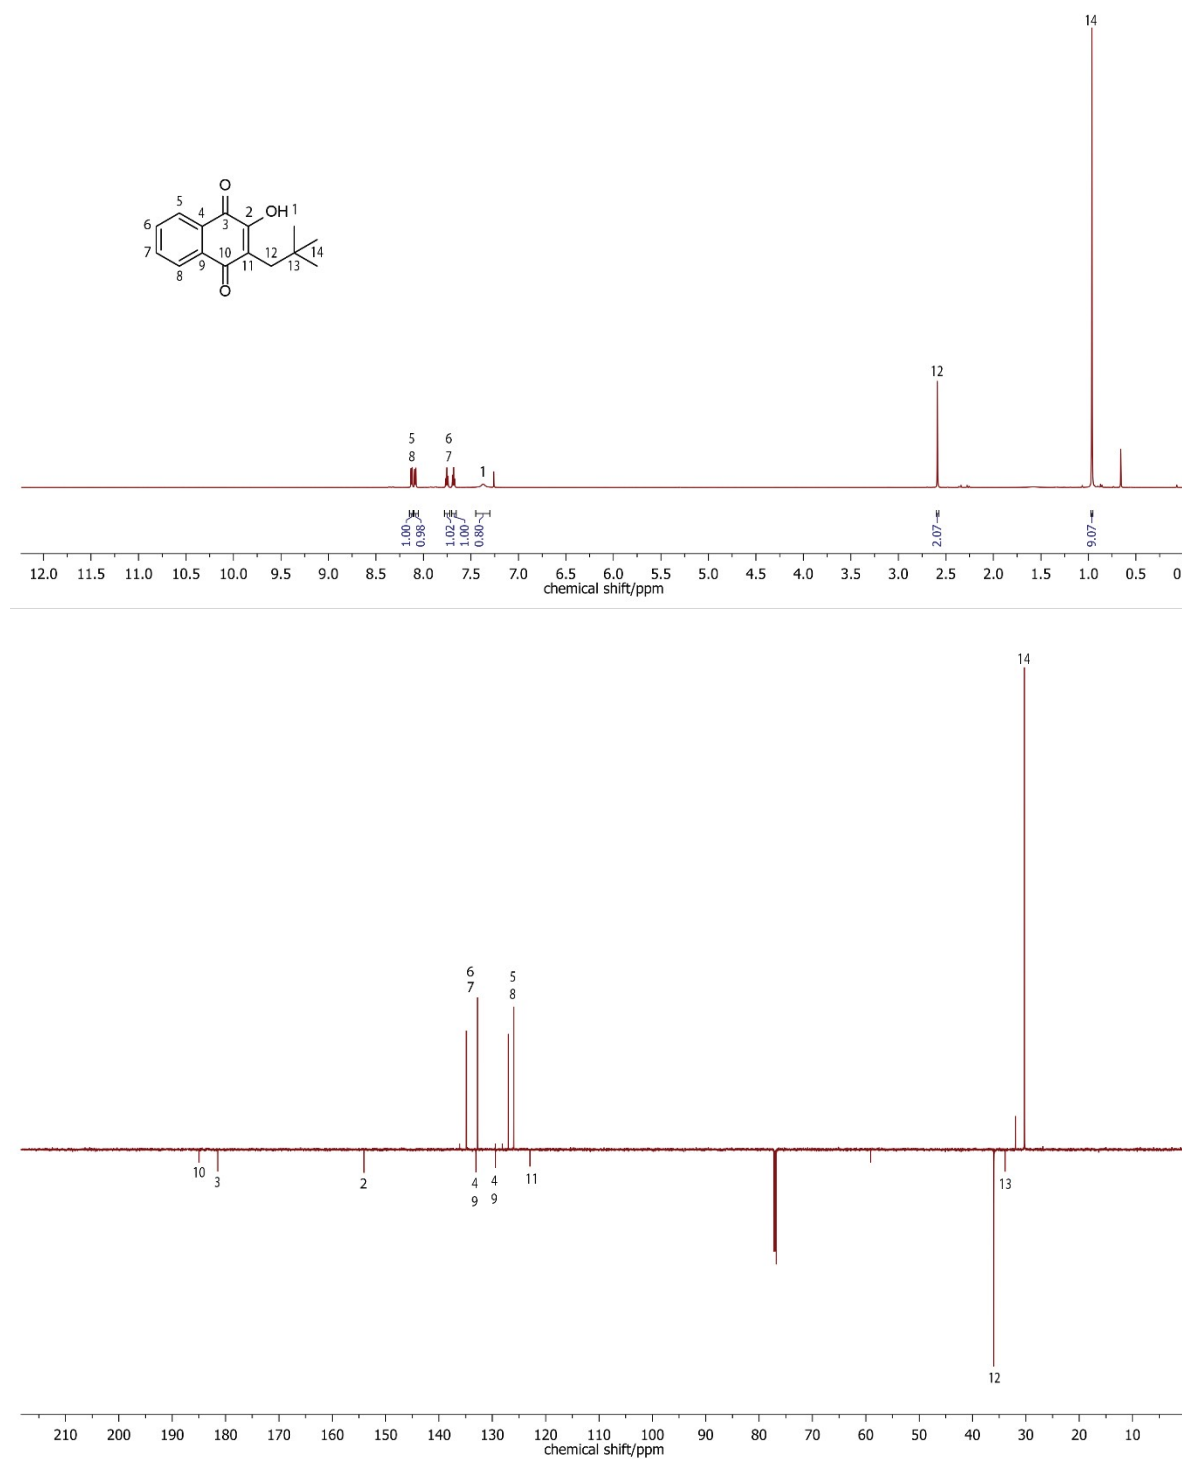

Figure S5:  $^1\text{H}$  (above) and  $^{13}\text{C}$  (below) NMR spectra of ligand **e** in  $\text{CDCl}_3$ .

1.1.6 2-(2-Ethylbutyl)-3-hydroxynaphthalene-1,4-dione: **f**

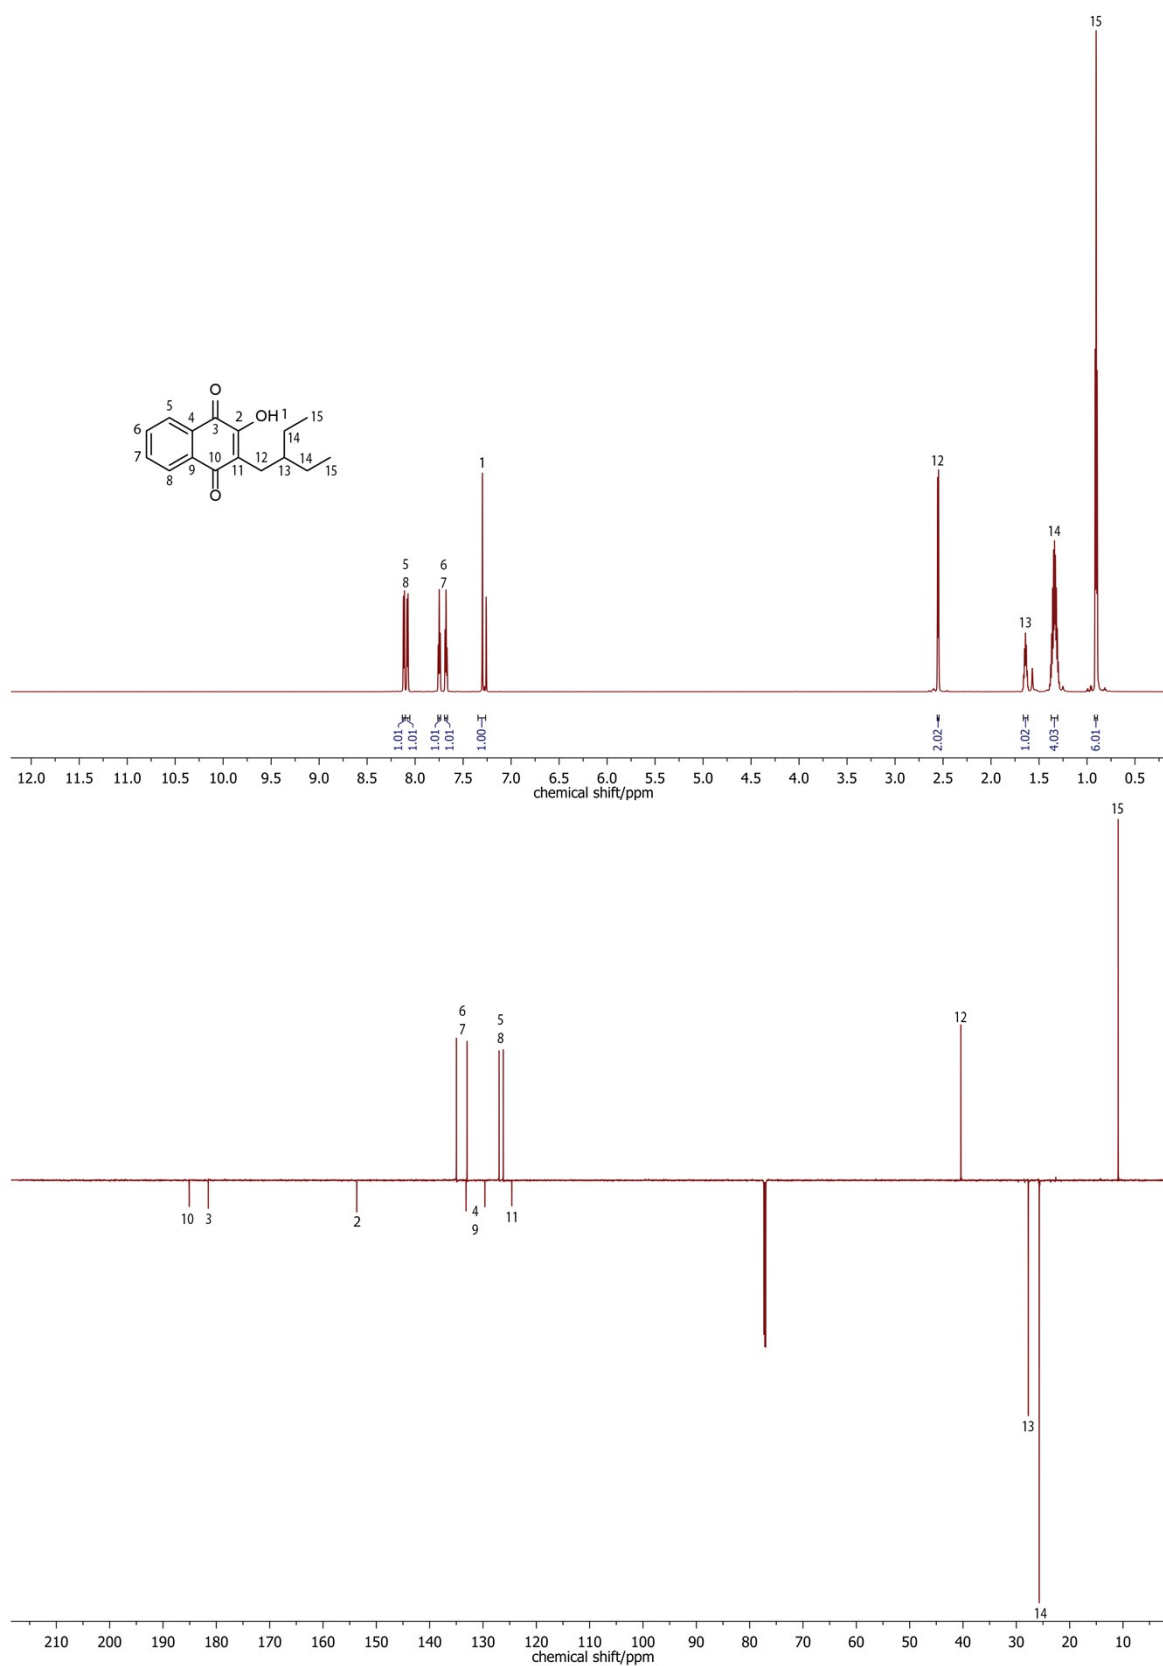

Figure S6:  $^1\text{H}$  (above) and  $^{13}\text{C}$  (below) NMR spectra of ligand **f** in  $\text{CDCl}_3$ .

1.1.7 [(3-Propyl-1-(1H- $\kappa$ N2-pyrazol-1-yl)-4-oxo-1,4-dihydronaphthalene-1,2-bis(olato)- $\kappa$ O1- $\kappa$ O2)( $\eta^6$ -*p*-cymene)ruthenium(II)]: **1a**

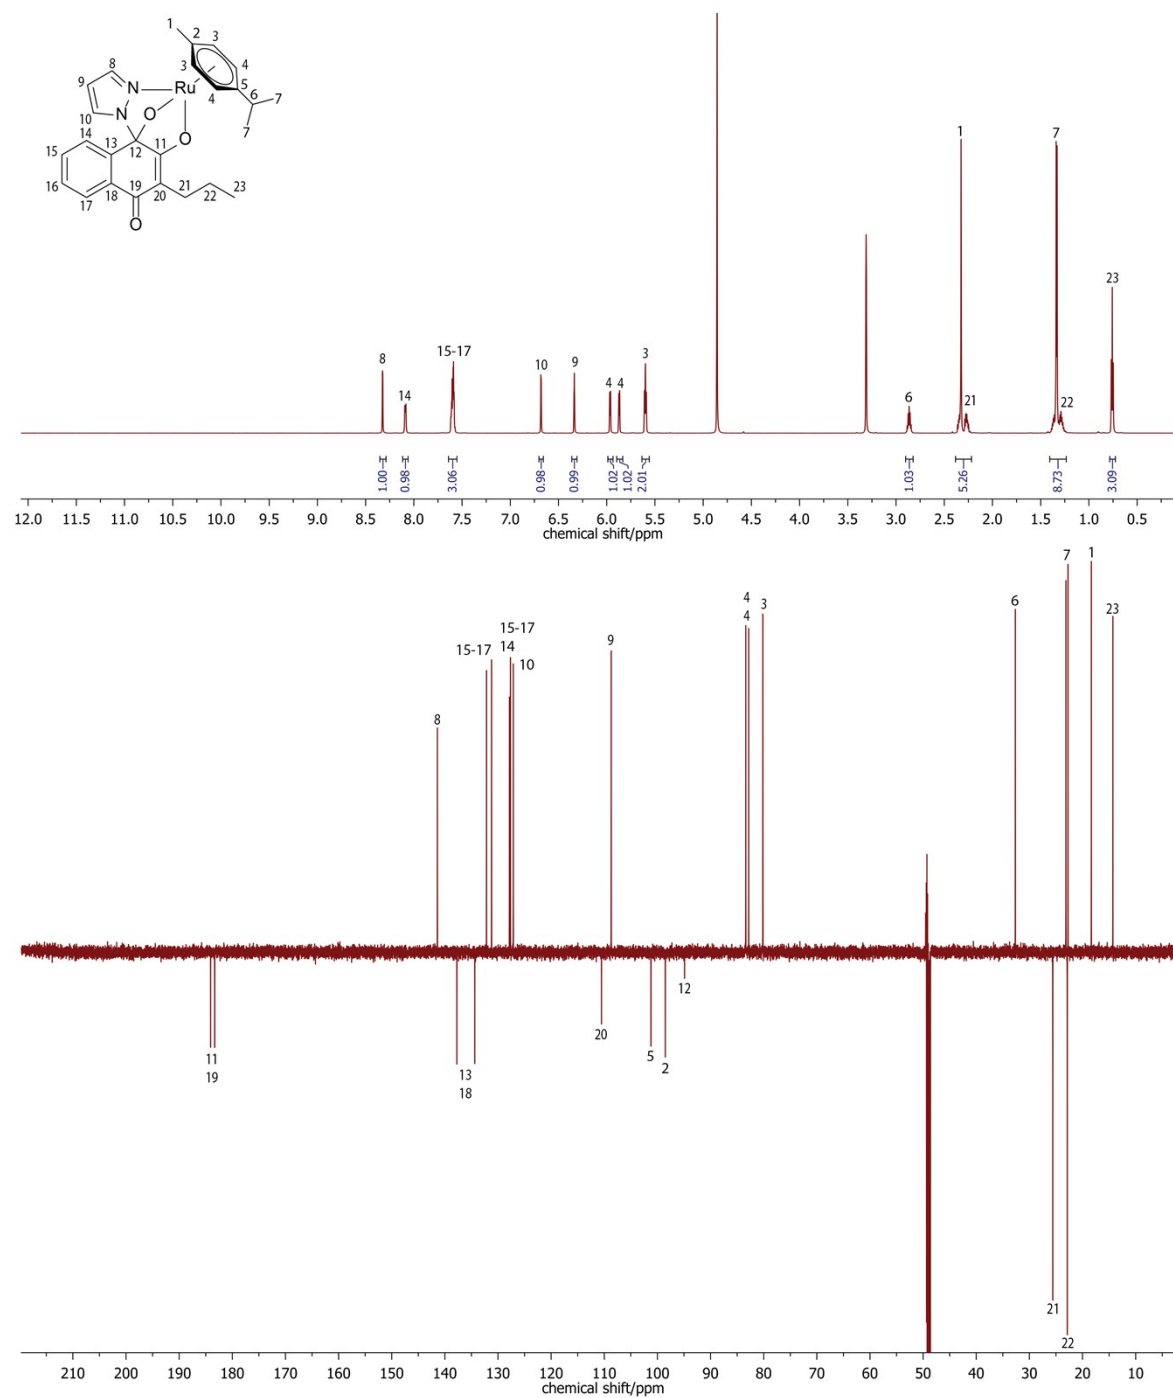

Figure S7:  $^1\text{H}$  (above) and  $^{13}\text{C}$  (below) NMR spectra of complex **1a** in  $\text{d}_4\text{-MeOD}$ .

1.1.8 [(3-Butyl-1-(1H- $\kappa$ N2-pyrazol-1-yl)-4-oxo-1,4-dihydronaphthalene-1,2-bis(olato)- $\kappa$ O1- $\kappa$ O2)( $\eta^6$ -*p*-cymene)ruthenium(II)]: **1b**

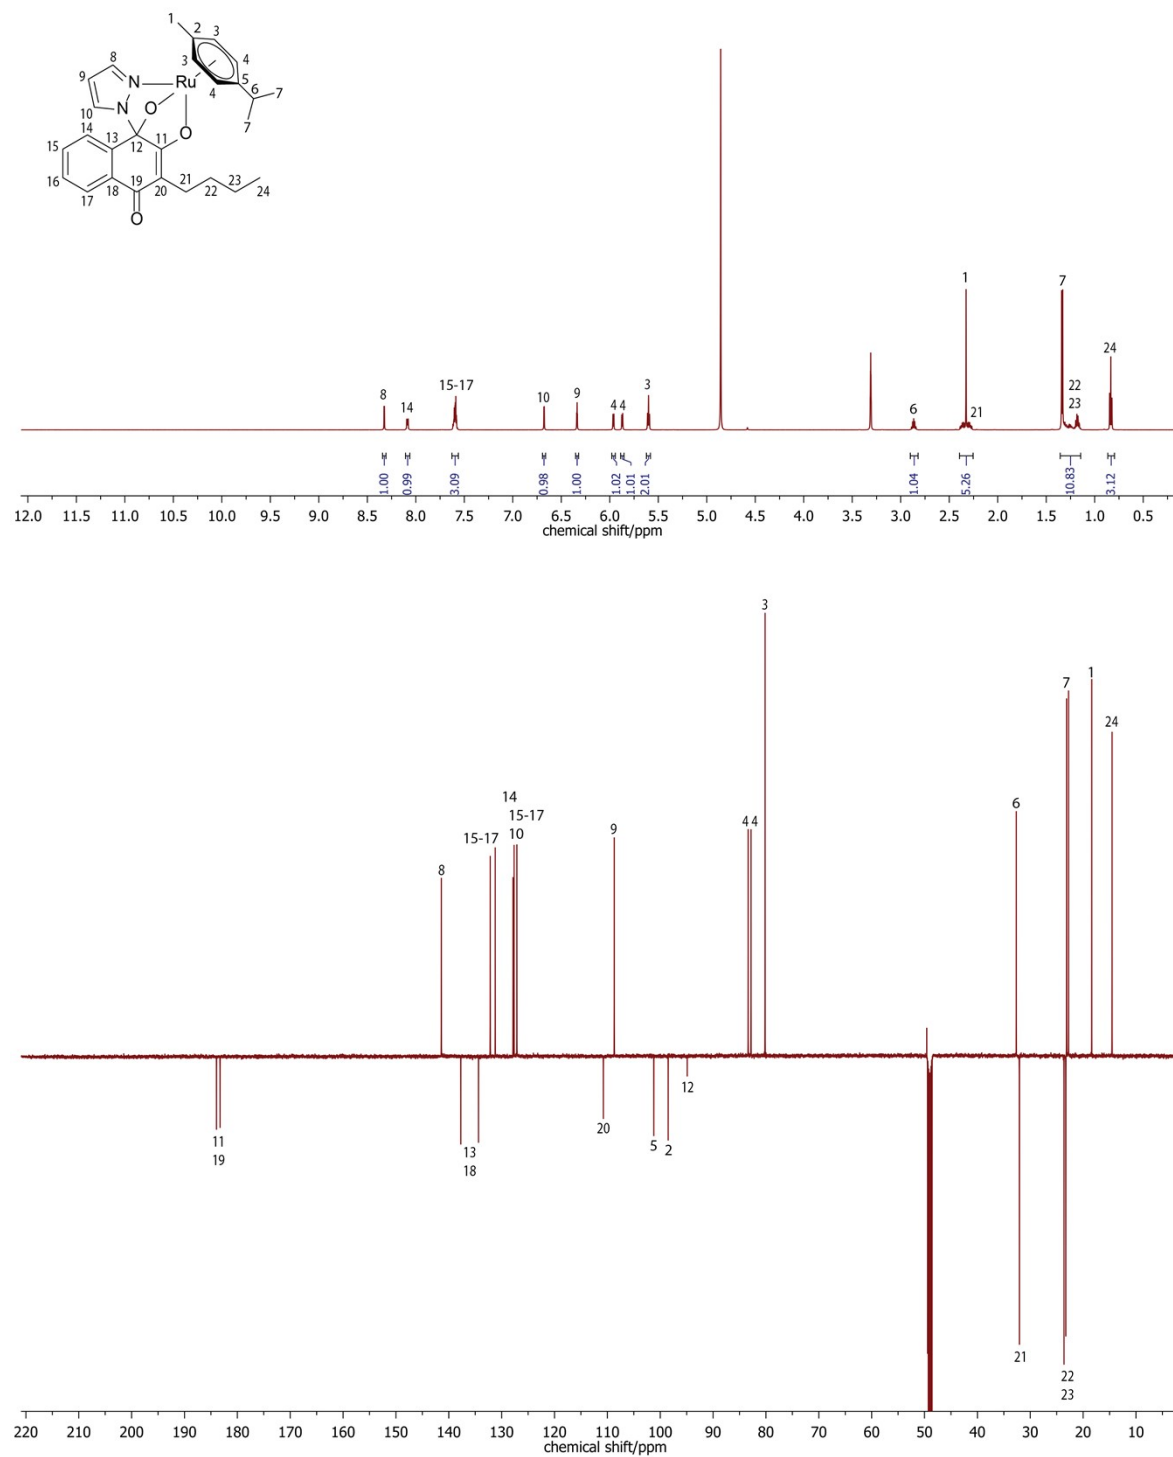

Figure S8: <sup>1</sup>H (above) and <sup>13</sup>C (below) NMR spectra of complex **1b** in d<sub>4</sub>-MeOD.

1.1.9 [(3-Isobutyl-1-(1H- $\kappa$ N2-pyrazol-1-yl)-4-oxo-1,4-dihydronaphthalene-1,2-bis(olato)- $\kappa$ O1- $\kappa$ O2)( $\eta^6$ -*p*-cymene)ruthenium(II)]: **1c**

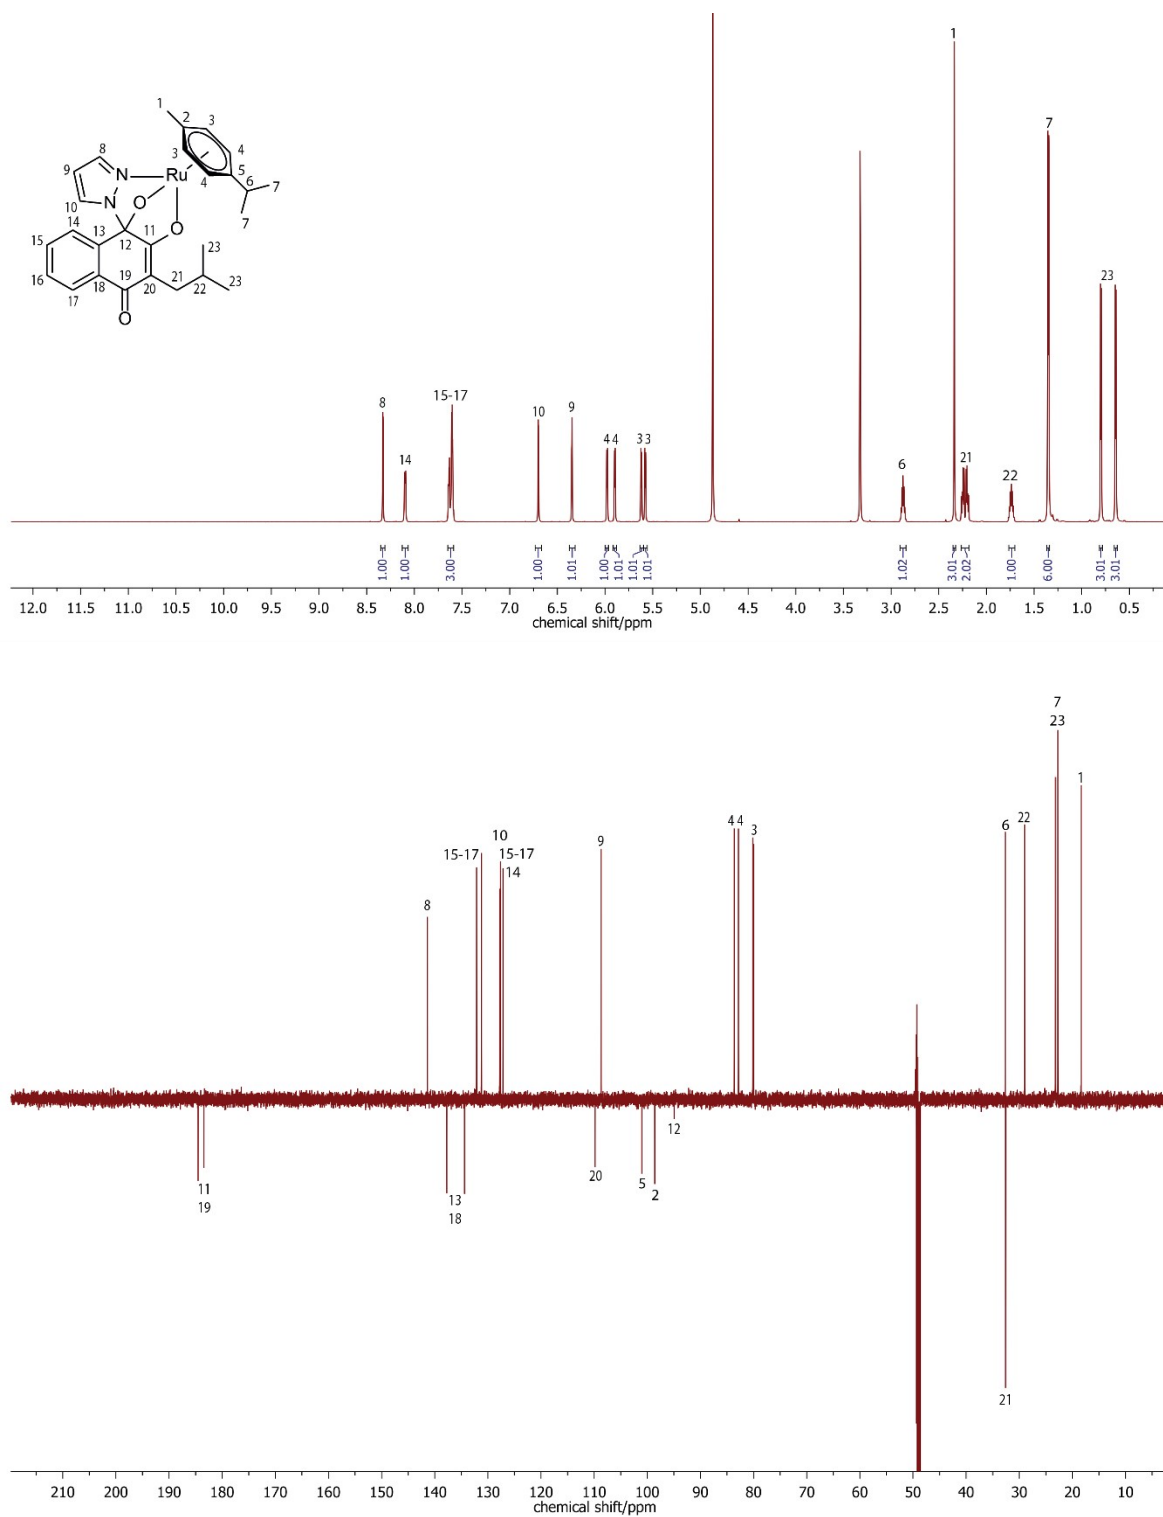

Figure S9:  $^1\text{H}$  (above) and  $^{13}\text{C}$  (below) NMR spectra of complex **1c** in  $\text{d}^4\text{-MeOD}$ .

1.1.10 [(3-(tert-butyl)-1-(1H- $\kappa$ N2-pyrazol-1-yl)-4-oxo-1,4-dihydronaphthalene-1,2-bis(olato)- $\kappa$ O1- $\kappa$ O2)( $\eta$ 6-p-cymene)ruthenium(II)]: **1d**

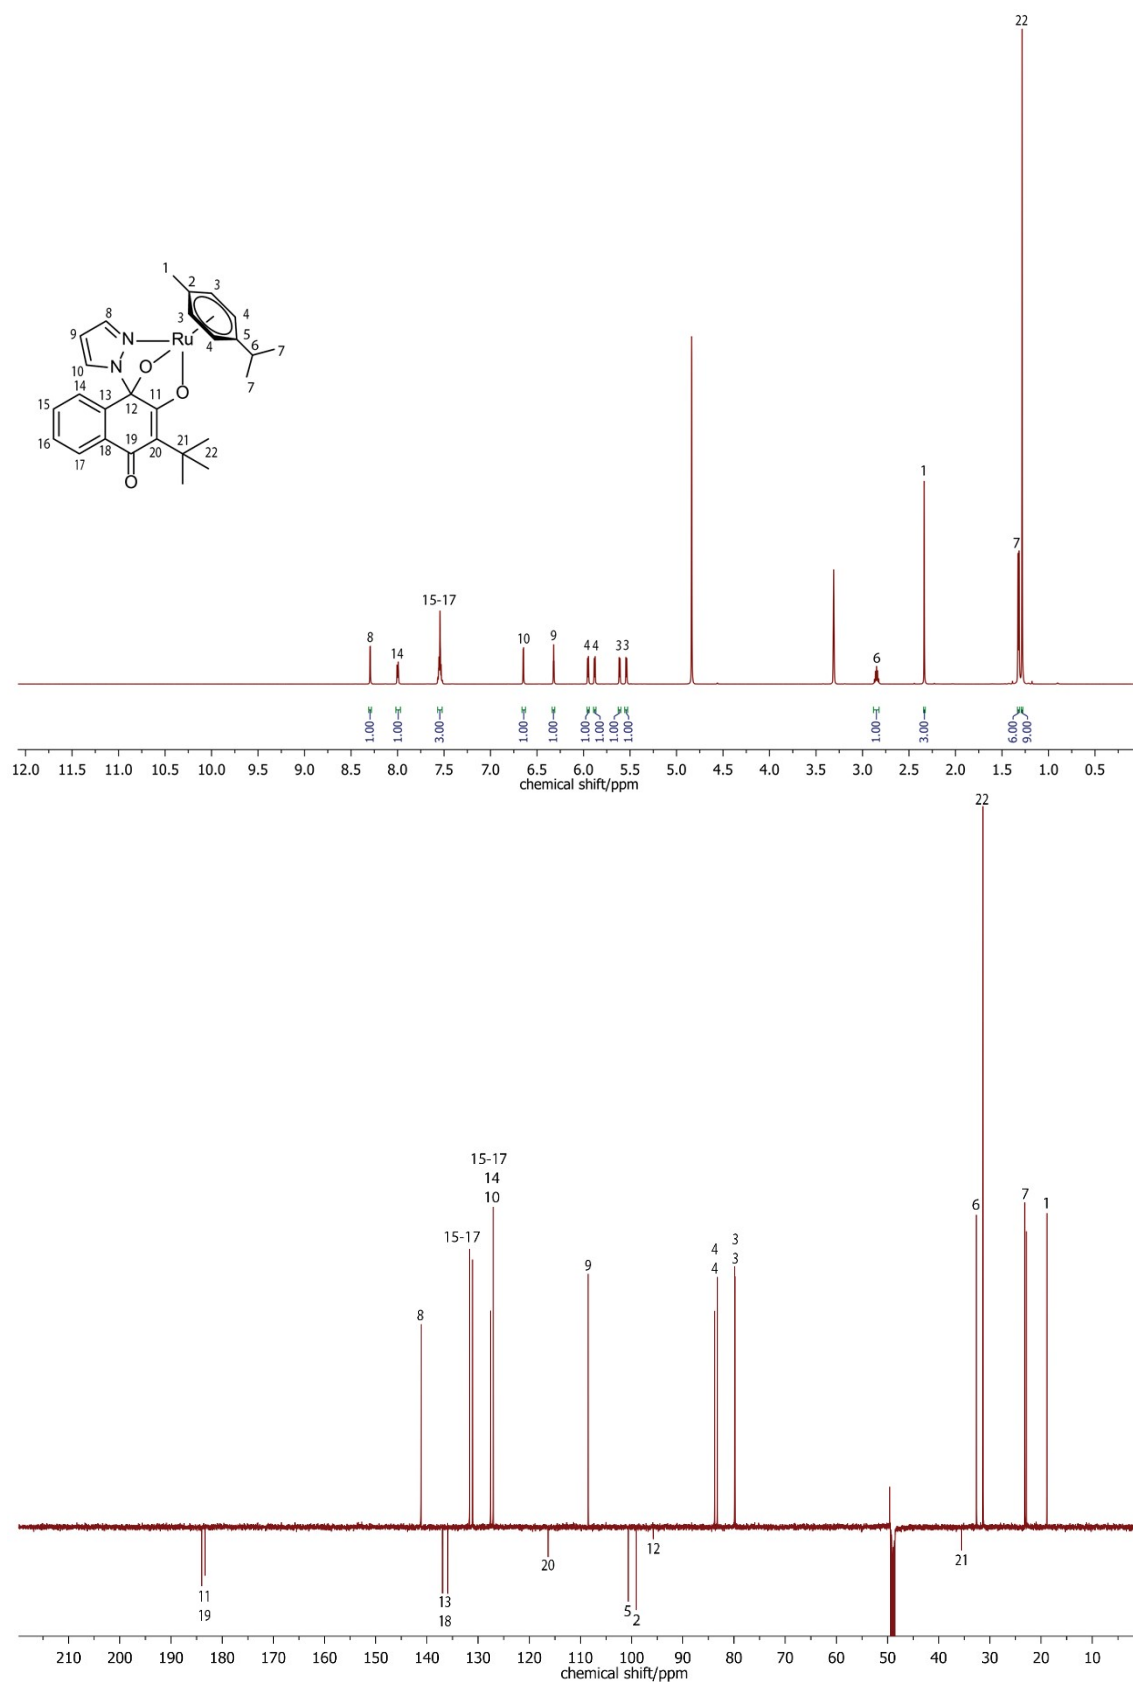

Figure S10:  $^1\text{H}$  (above) and  $^{13}\text{C}$  (below) NMR spectra of complex **1d** in  $\text{d}_4\text{-MeOD}$ .



1.1.11 [(3-Neopentyl-1-(1H- $\kappa$ N2-pyrazol-1-yl)-4-oxo-1,4-dihydronaphthalene-1,2-bis(olato)- $\kappa$ O1- $\kappa$ O2)( $\eta^6$ -*p*-cymene)ruthenium(II)]: **1e**

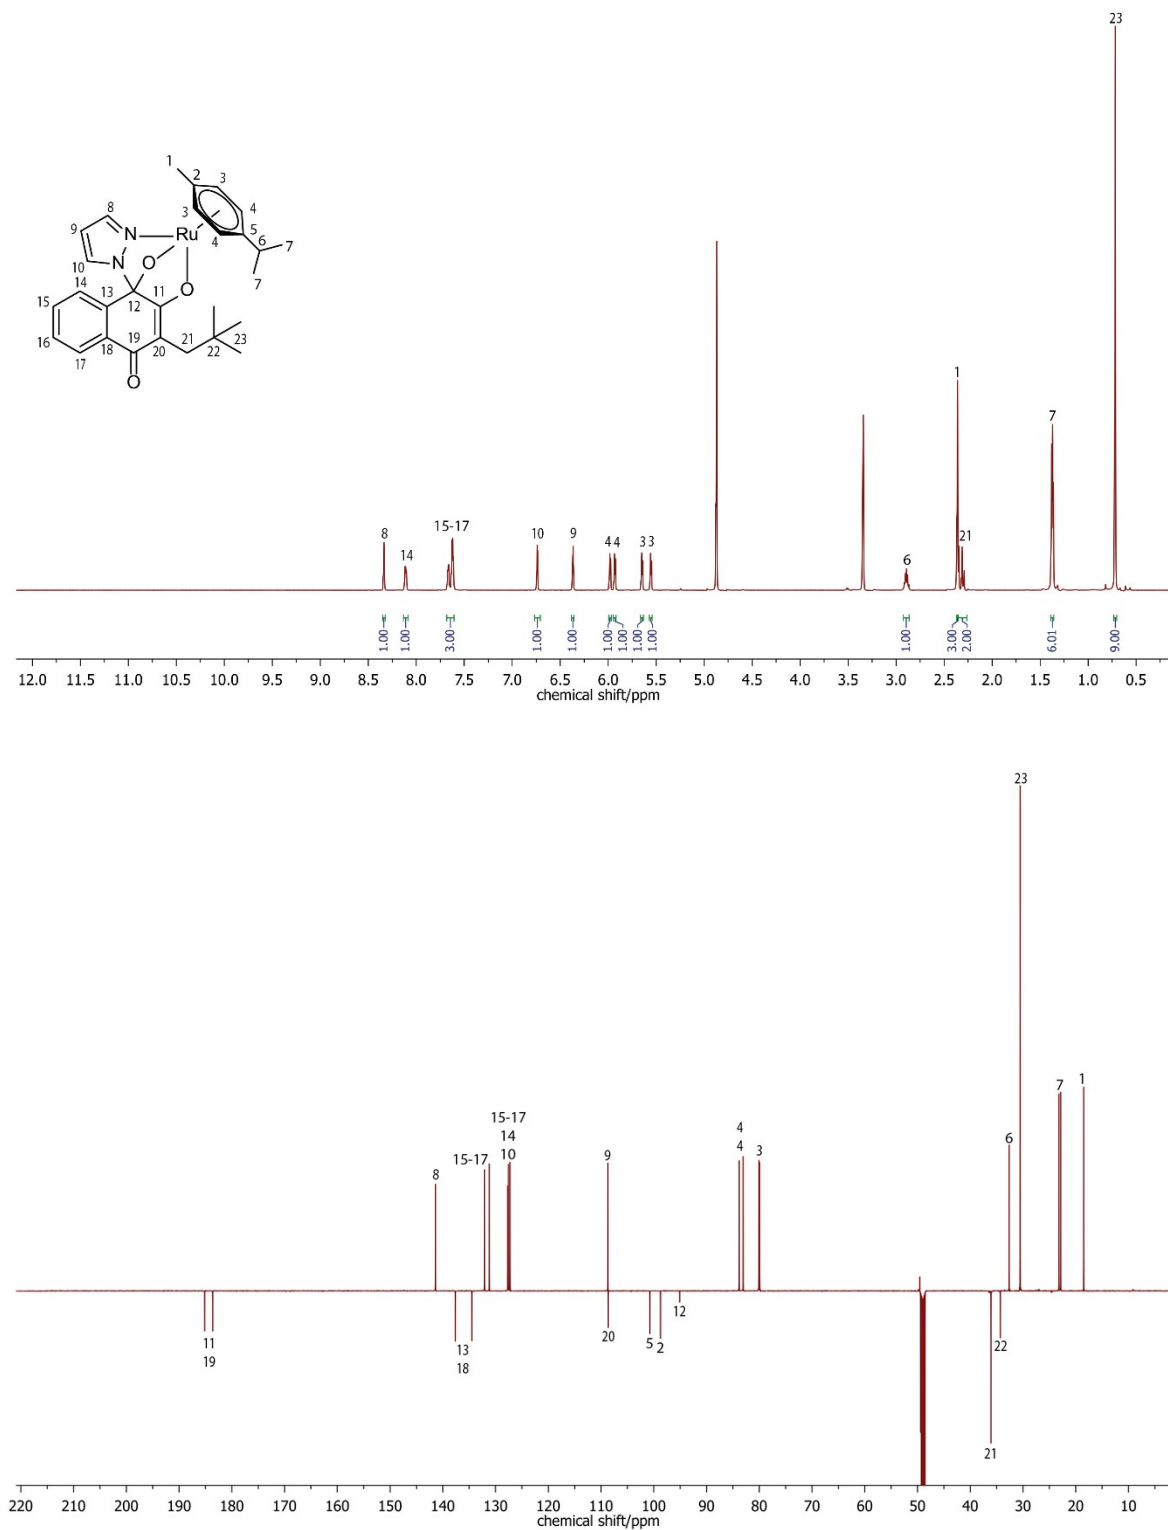

Figure S11:  $^1\text{H}$  (above) and  $^{13}\text{C}$  (below) NMR spectra of complex **1e** in  $d^4$ -MeOD.

1.1.12 [(3-(2-Ethylbutyl)-1-(1H- $\kappa$ N2-pyrazol-1-yl)-4-oxo-1,4-dihydronaphthalene-1,2-bis(olato)- $\kappa$ O1- $\kappa$ O2)( $\eta$ 6-p-cymene)ruthenium(II)]: **1f**

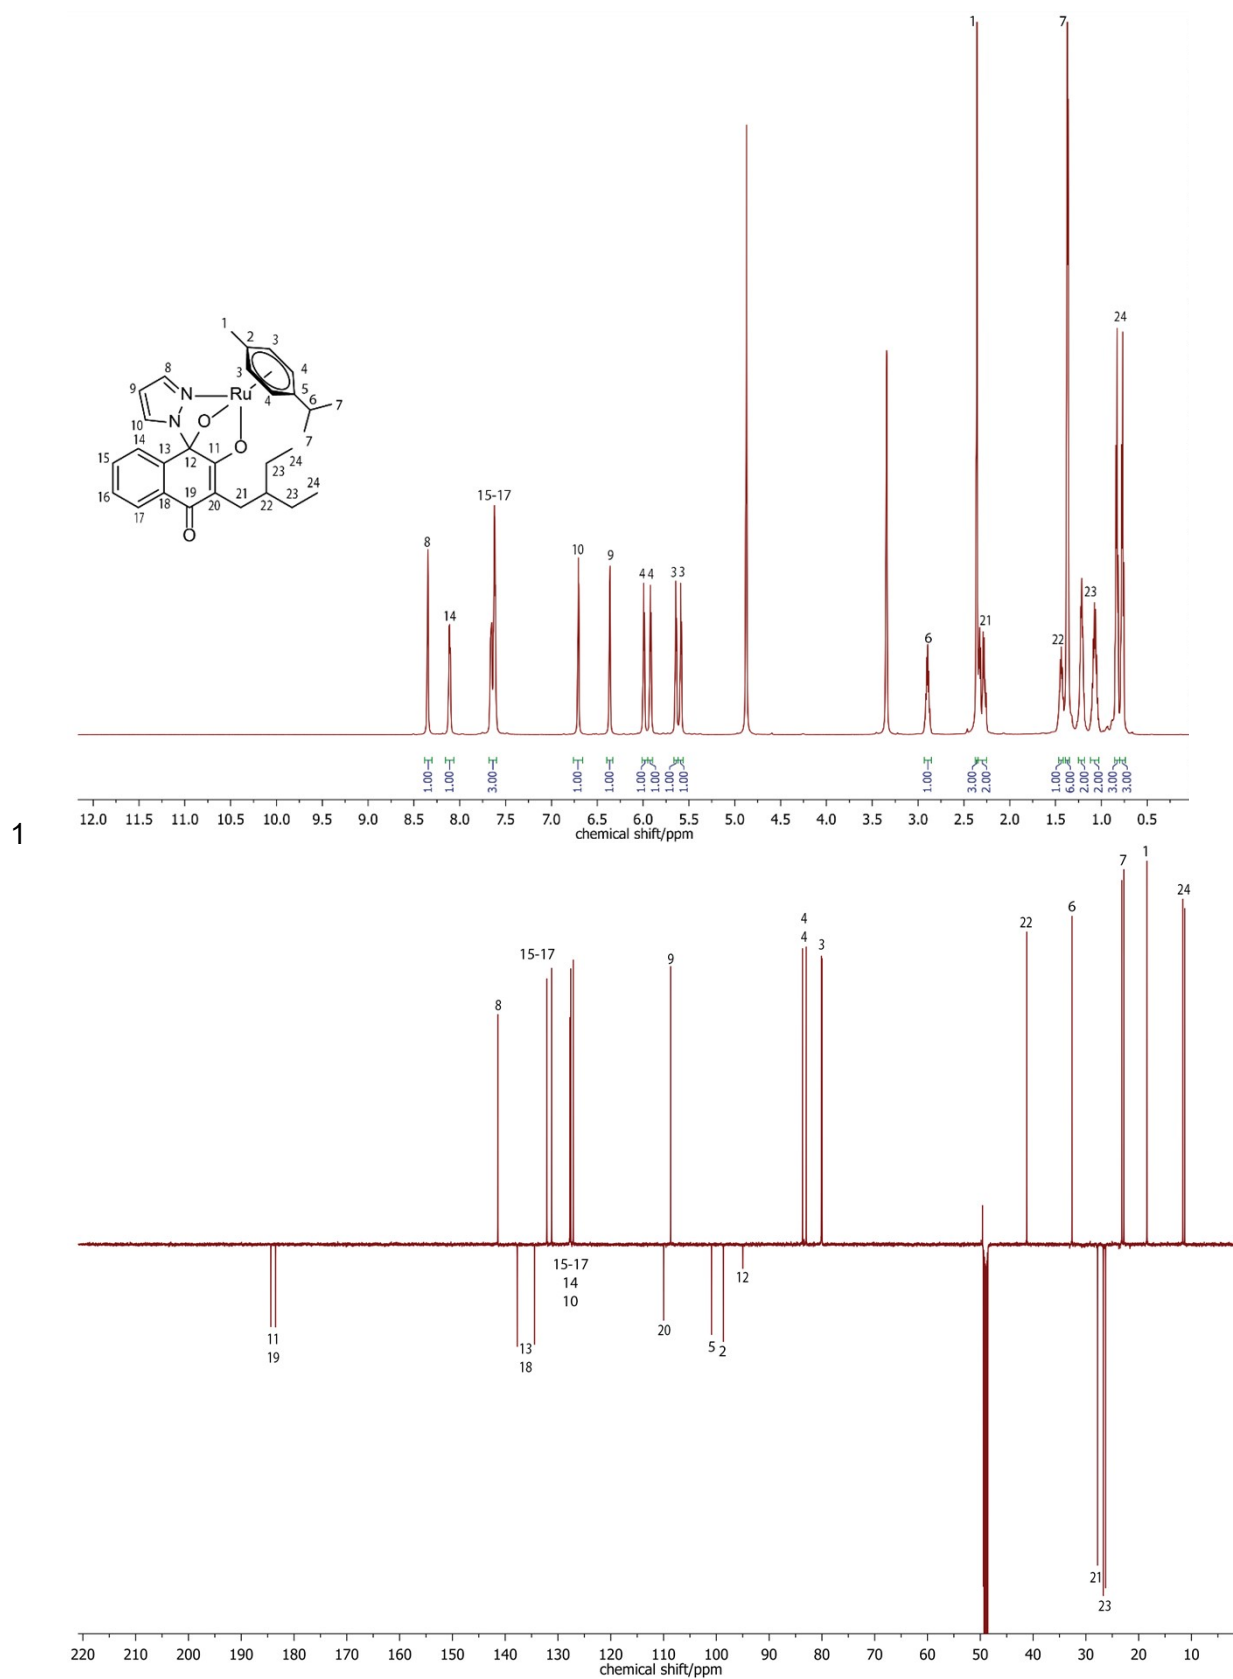

Figure S12:  $^1\text{H}$  (above) and  $^{13}\text{C}$  (below) NMR spectra of complex **1f** in  $\text{d}^4\text{-MeOD}$ .

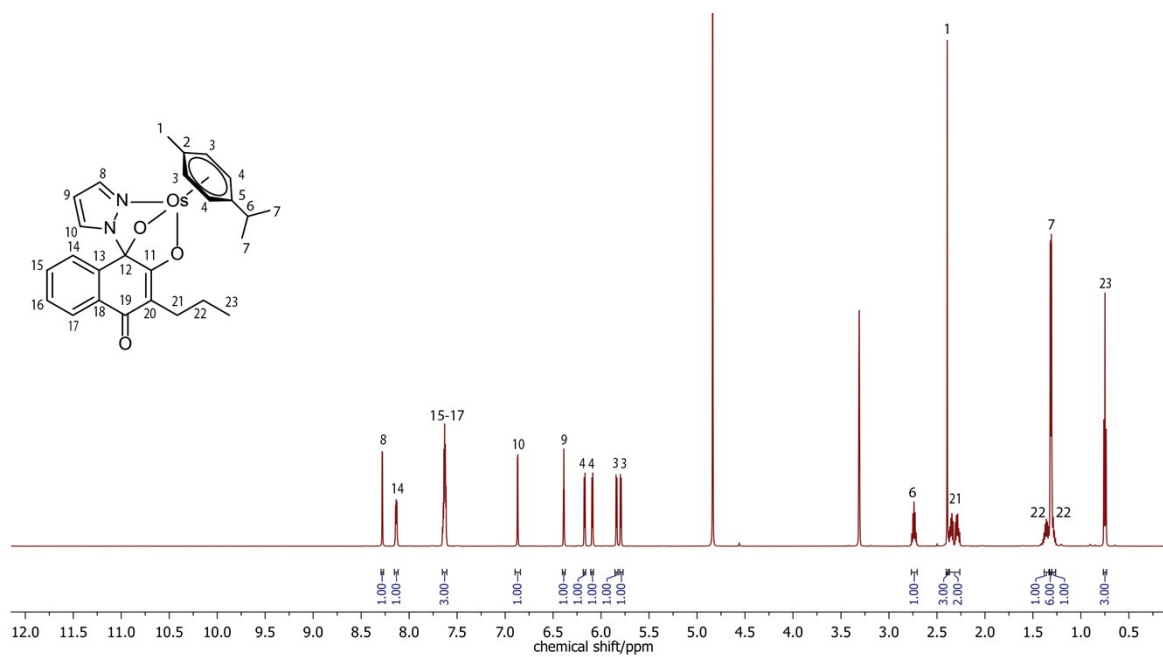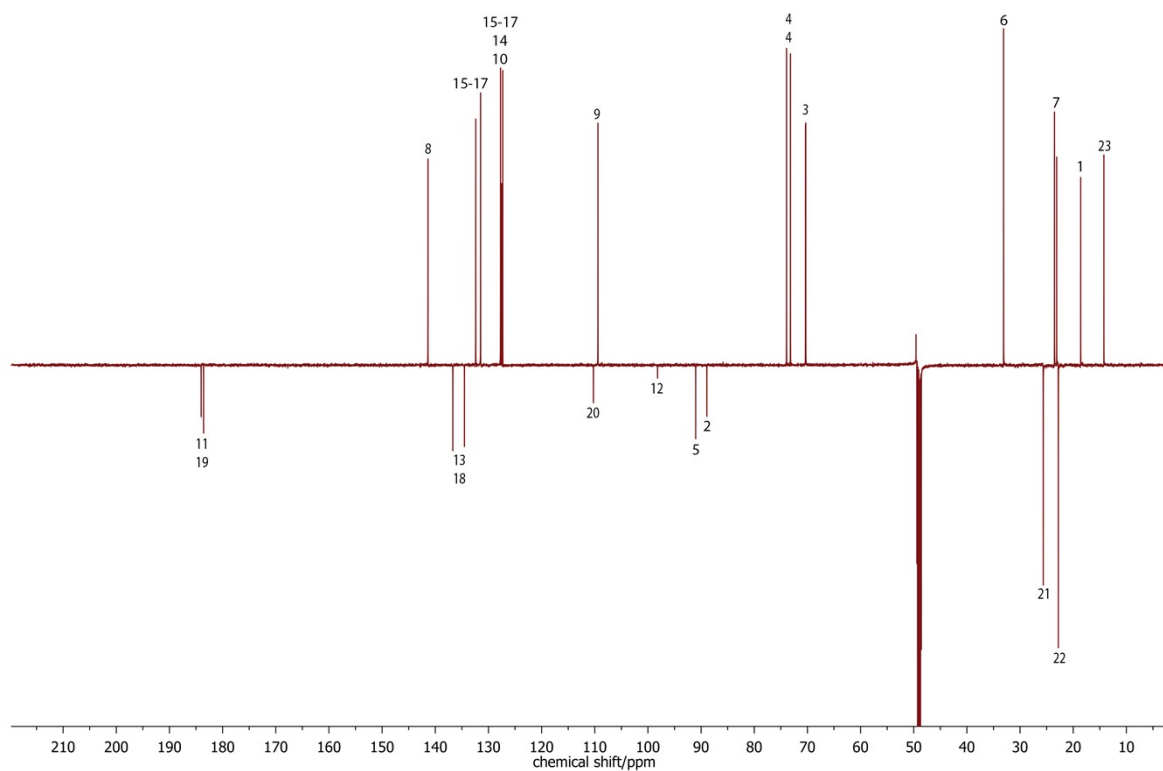

15

1.1.14 [(3-Butyl-1-(1H- $\kappa$ N2-pyrazol-1-yl)-4-oxo-1,4-dihydronaphthalene-1,2-bis(olato)- $\kappa$ O1- $\kappa$ O2)( $\eta^6$ -*p*-cymene)osmium(II)]: **2b**

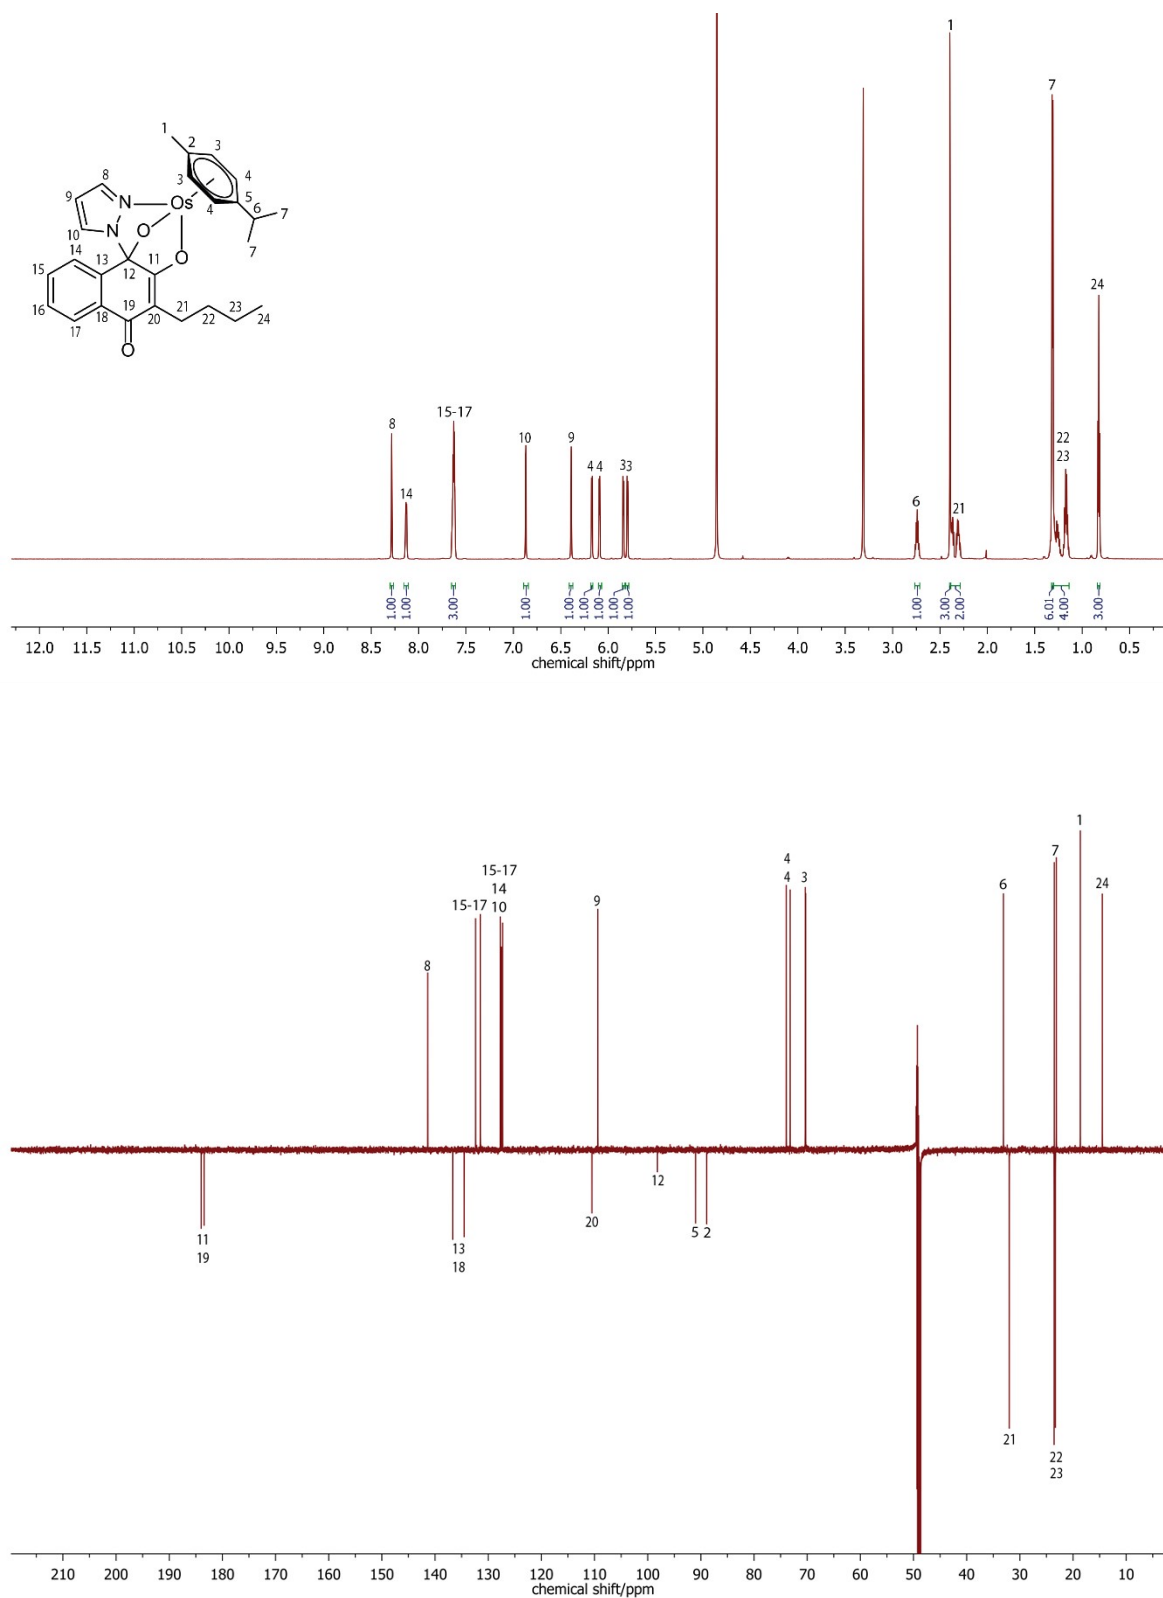

Figure S14:  $^1\text{H}$  (above) and  $^{13}\text{C}$  (below) NMR spectra of complex **2b** in  $d_4$ -MeOD.

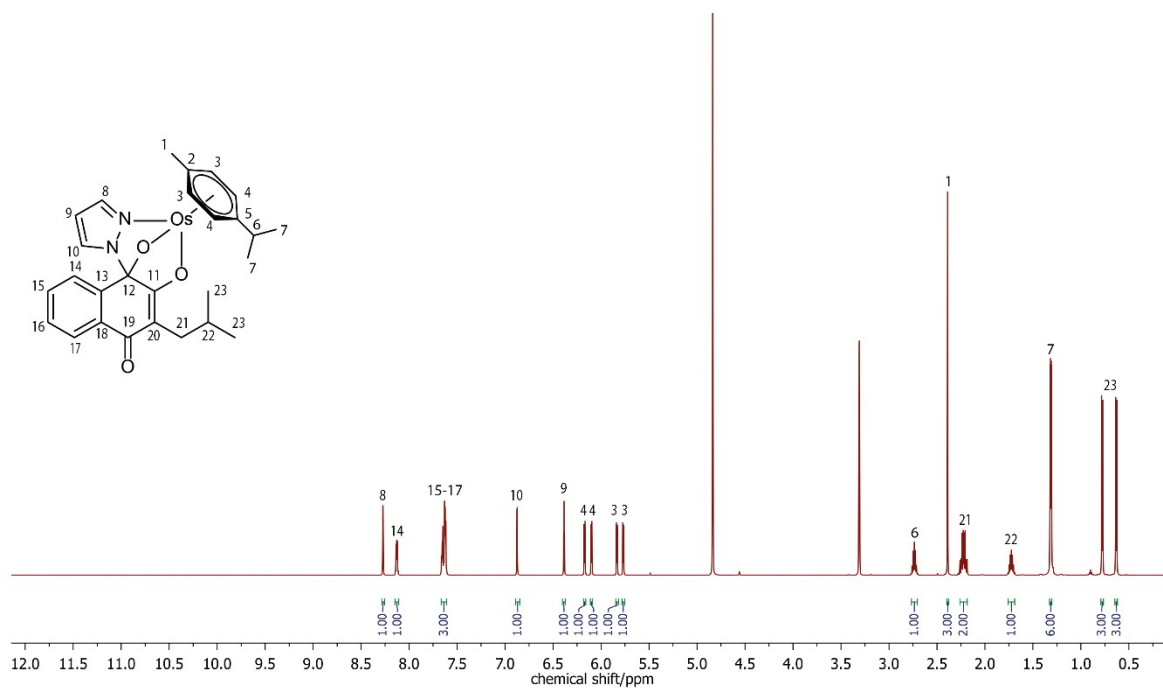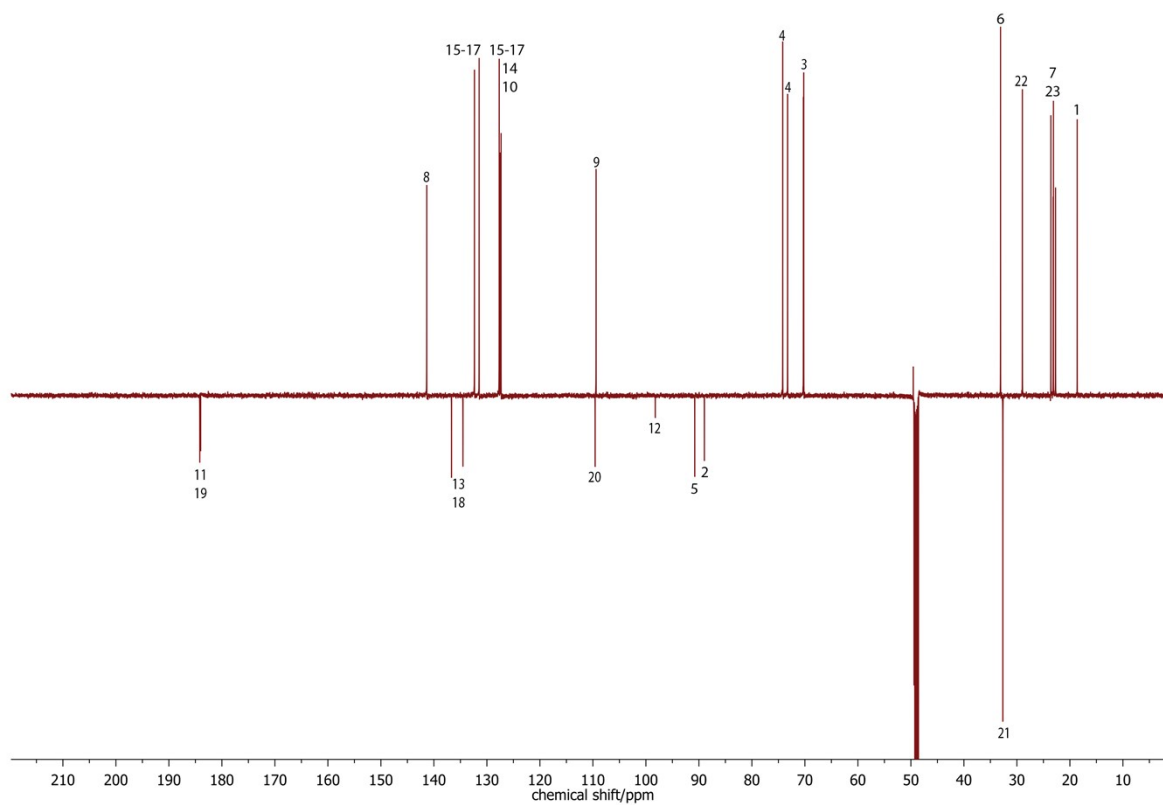

17

**Chemical structure of compound 1:** CC(C)(C)C1=CC=C(C=C1)C(=O)C2=CC=CC=C2C3=C(C(=O)O)N(C3)C4=CC=CC=C4

**<sup>1</sup>H NMR (400 MHz, CDCl<sub>3</sub>) spectrum:**

| Chemical shift (ppm) | Integration |
|----------------------|-------------|
| 1.0 (t, 3H)          | 9.00        |
| 1.5 (t, 3H)          | 6.00        |
| 2.5 (s, 1H)          | 1.00        |
| 3.5 (s, 1H)          | 3.00        |
| 5.0 (s, 1H)          | 1.00        |
| 5.5 (s, 1H)          | 1.00        |
| 5.8 (s, 1H)          | 1.00        |
| 6.0 (s, 1H)          | 1.00        |
| 6.2 (s, 1H)          | 1.00        |
| 6.4 (s, 1H)          | 1.00        |
| 6.8 (s, 1H)          | 1.00        |
| 7.2 (s, 1H)          | 3.00        |
| 7.5 (s, 1H)          | 1.00        |
| 7.8 (s, 1H)          | 1.00        |
| 8.2 (s, 1H)          | 1.00        |

**<sup>13</sup>C NMR (100 MHz, CDCl<sub>3</sub>) spectrum:**

| Chemical shift (ppm) |
|----------------------|
| 10                   |
| 11                   |
| 12                   |
| 13                   |
| 14                   |
| 15                   |
| 16                   |
| 17                   |
| 18                   |
| 19                   |
| 20                   |
| 21                   |
| 22                   |

1.1.17 [(3-Neopentyl-1-(1H- $\kappa$ N2-pyrazol-1-yl)-4-oxo-1,4-dihydronaphthalene-1,2-bis(olato)- $\kappa$ O1- $\kappa$ O2)( $\eta^6$ -p-cymene)osmium(II)]: **2e**

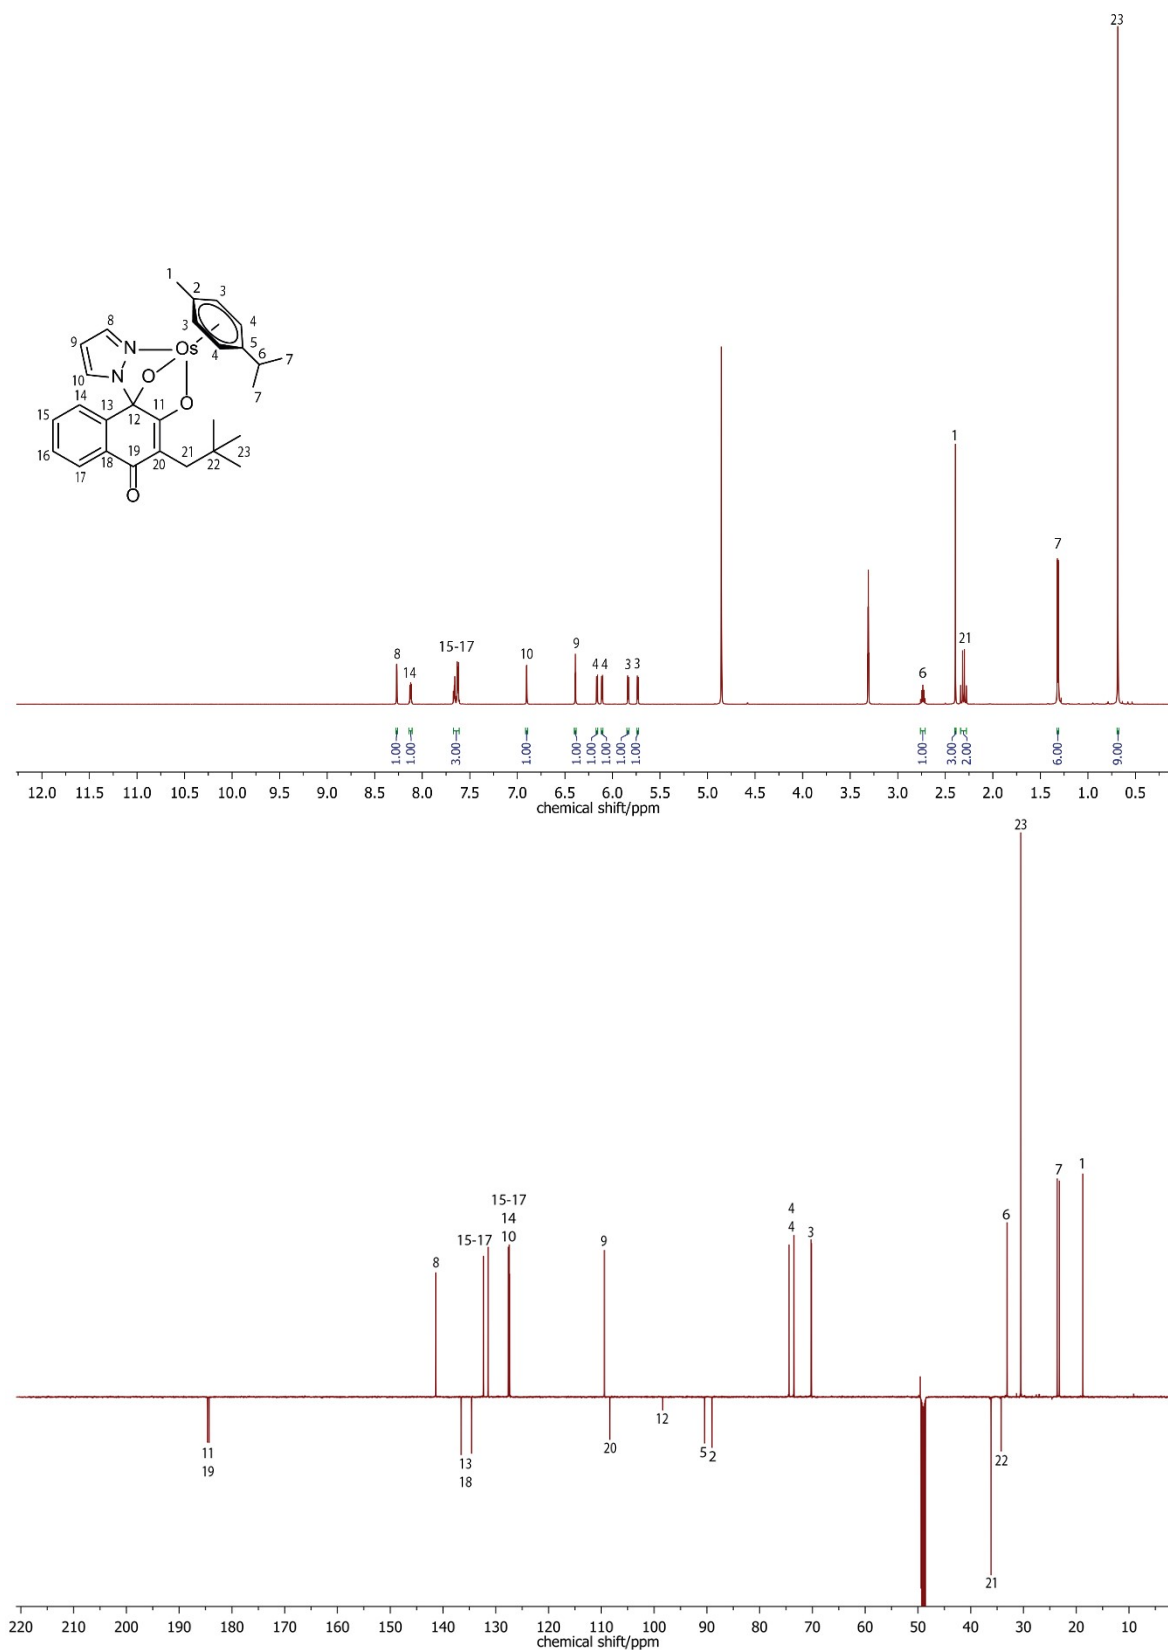

Figure S17:  $^1\text{H}$  (above) and  $^{13}\text{C}$  (below) NMR spectra of complex **2e** in  $d_4$ -MeOD.

1.1.18 [(3-(2-Ethylbutyl)-1-(1H- $\kappa$ N2-pyrazol-1-yl)-4-oxo-1,4-dihydronaphthalene-1,2-bis(olato)- $\kappa$ O1- $\kappa$ O2)( $\eta^6$ -*p*-cymene)osmium(II)]: **2f**

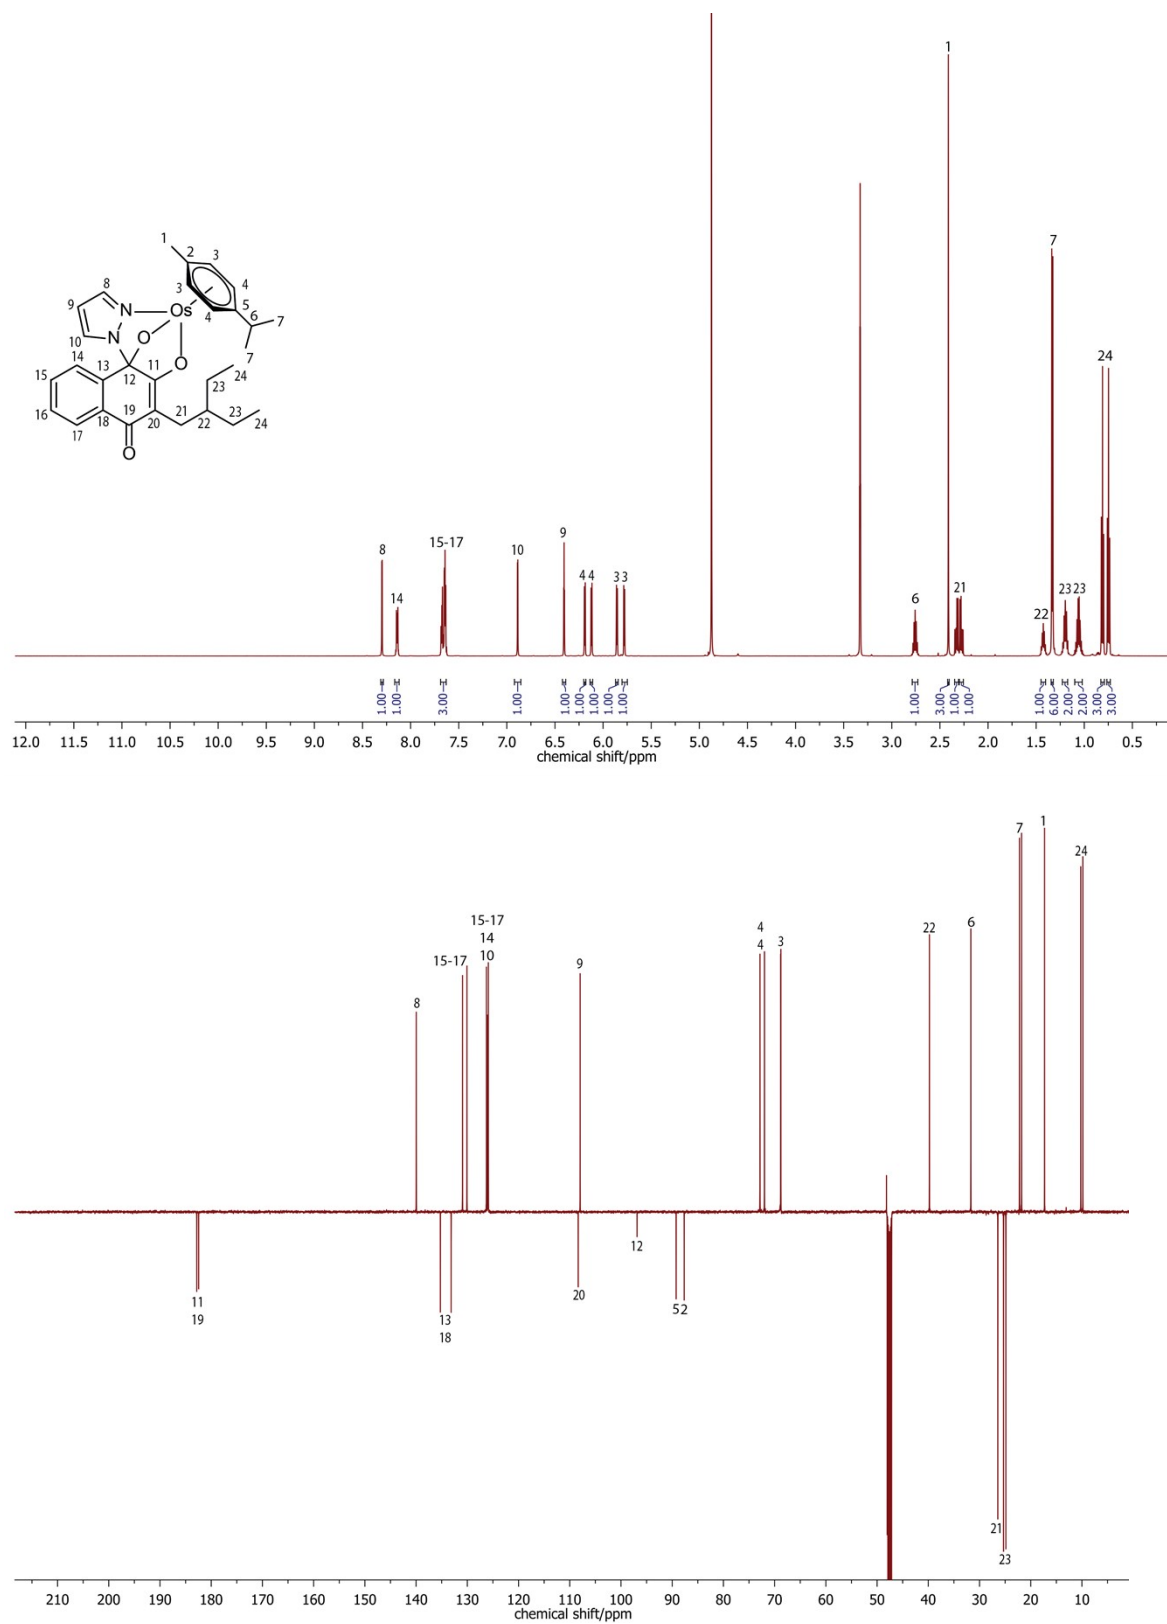

Figure S18:  $^1\text{H}$  (above) and  $^{13}\text{C}$  (below) NMR spectra of complex **2f** in  $\text{d}_4\text{-MeOD}$ .



## 2 Mass spectra

### 2.1.1 [(3-Propyl-1-(1H- $\kappa$ N2-pyrazol-1-yl)-4-oxo-1,4-dihydronaphthalene-1,2-bis(olato)- $\kappa$ O1- $\kappa$ O2)( $\eta^6$ -*p*-cymene)ruthenium(II)]: **1a**

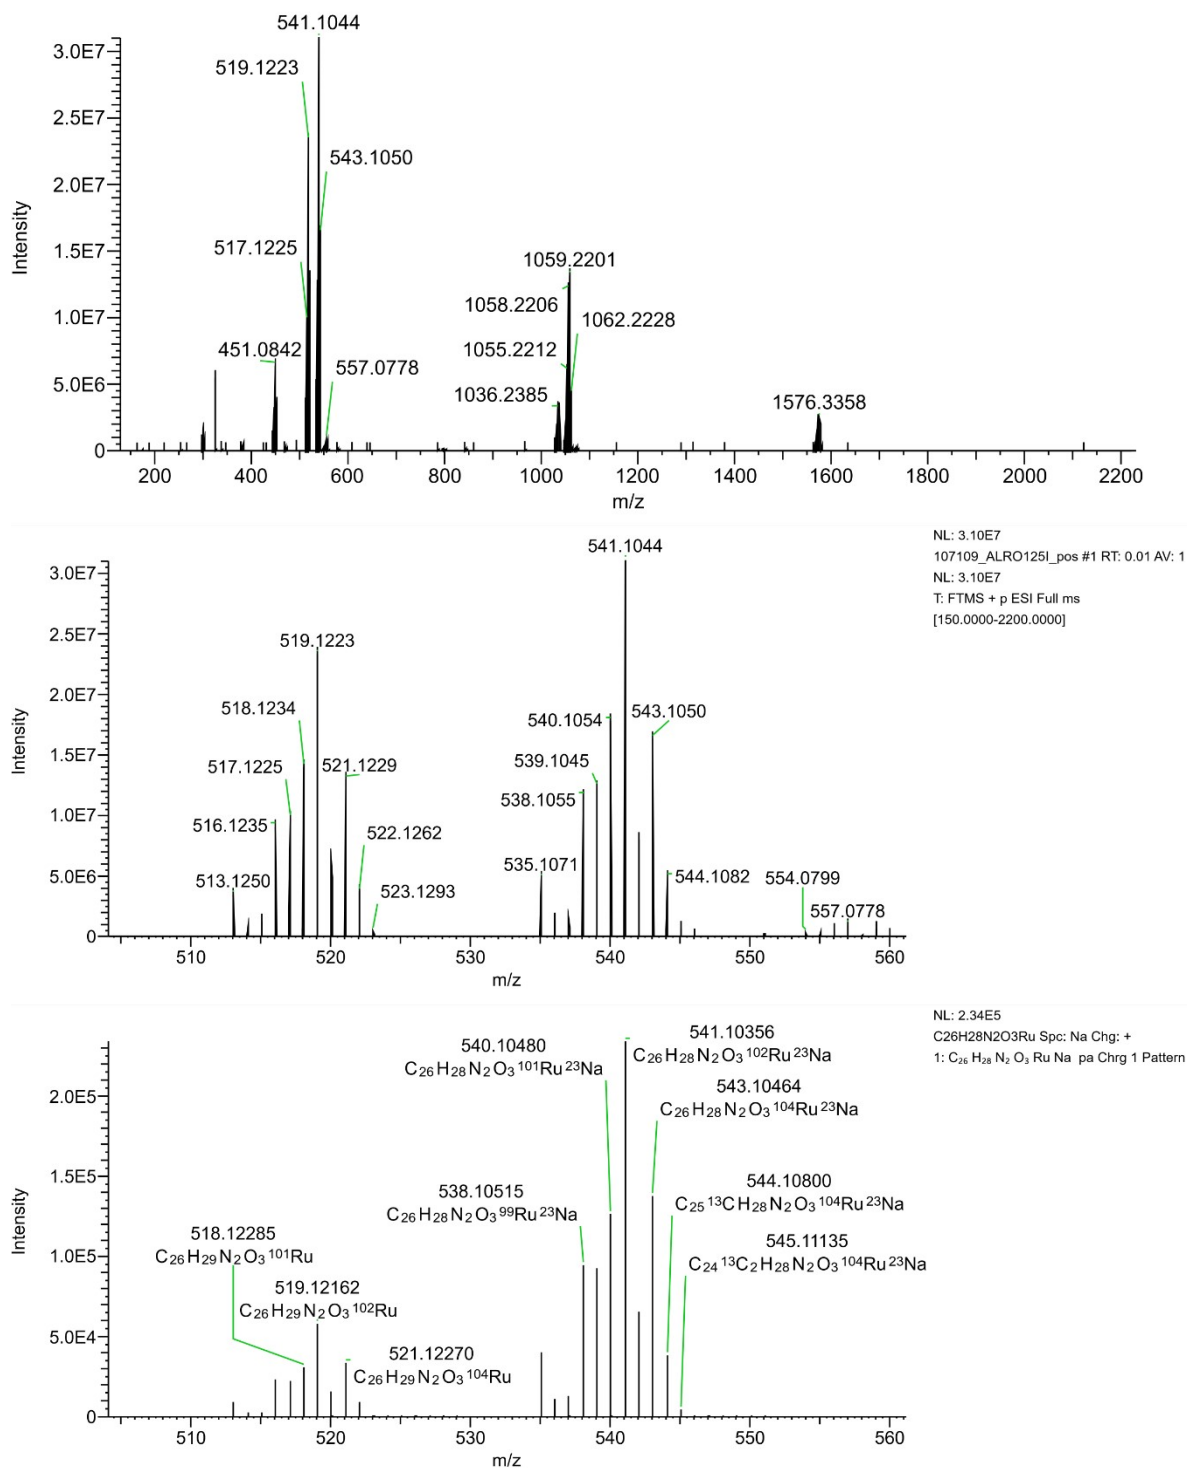

Figure S19: Mass spectrum of complex **1a**.

2.1.2 [(3-Butyl-1-(1H- $\kappa$ N2-pyrazol-1-yl)-4-oxo-1,4-dihydronaphthalene-1,2-bis(olato)- $\kappa$ O1- $\kappa$ O2)( $\eta^6$ -*p*-cymene)ruthenium(II)]: **1b**

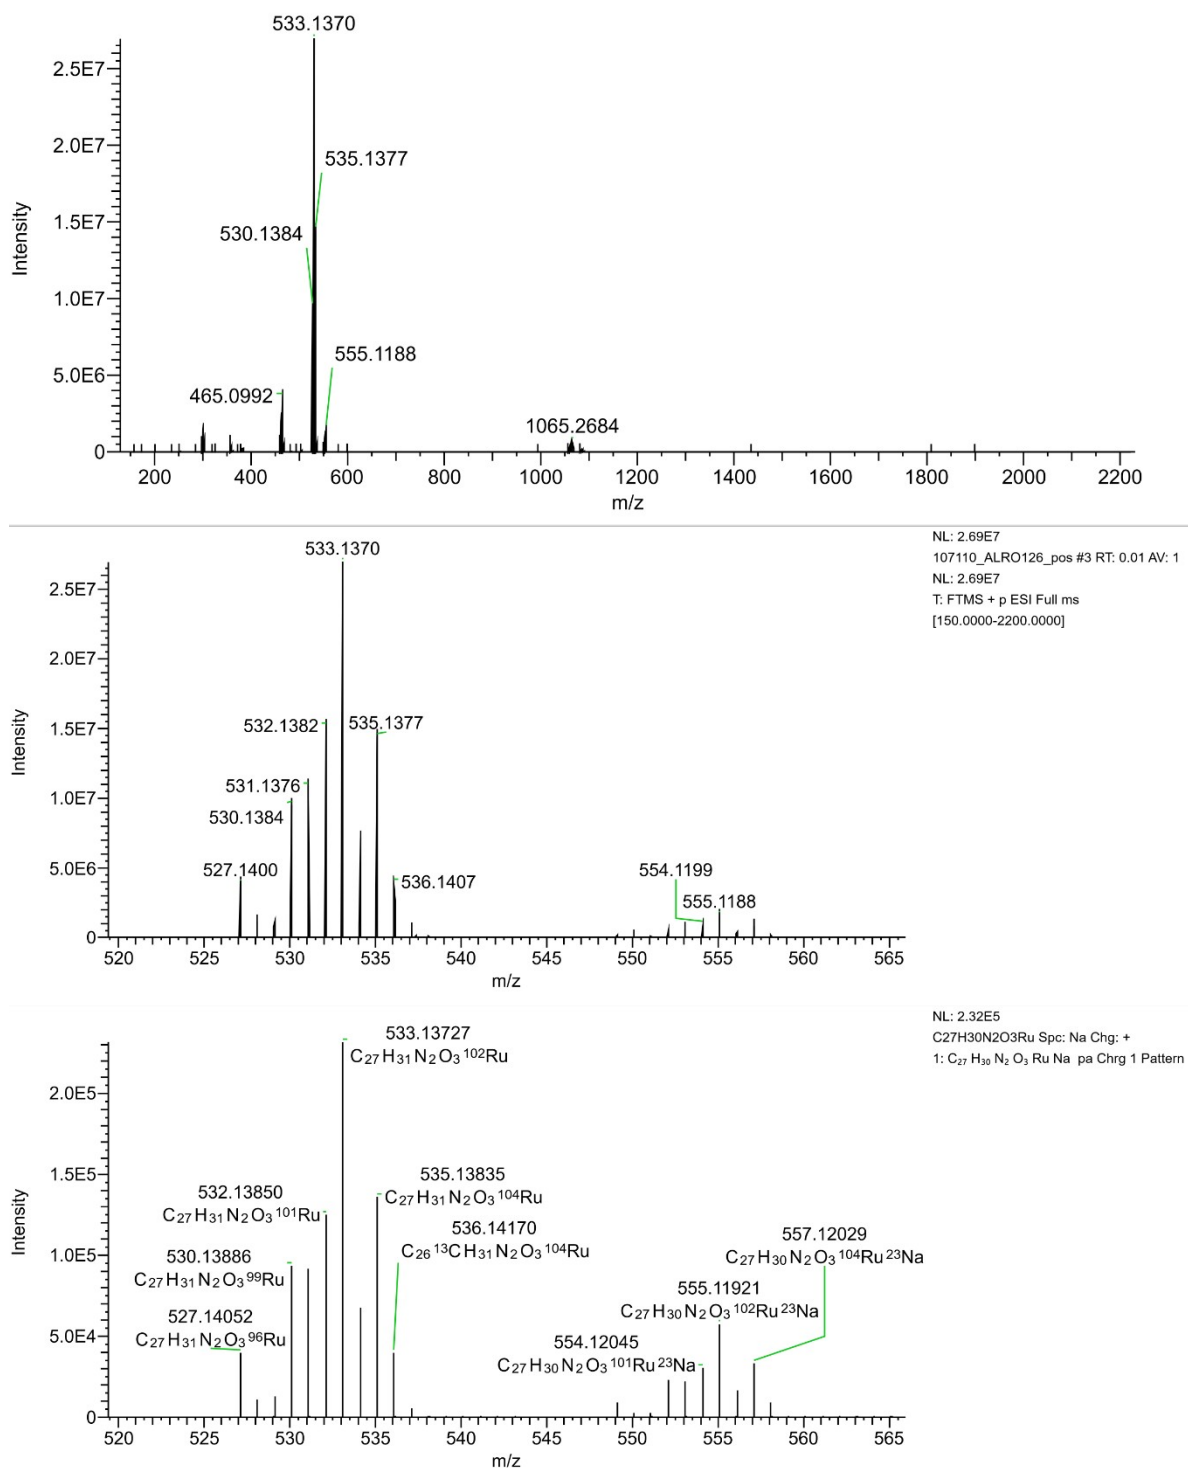

Figure S20: Mass spectrum of complex **1b**.

2.1.3 [(3-Isobutyl-1-(1H- $\kappa$ N2-pyrazol-1-yl)-4-oxo-1,4-dihydronaphthalene-1,2-bis(olato)- $\kappa$ O1- $\kappa$ O2)( $\eta^6$ -*p*-cymene)ruthenium(II)]: **1c**

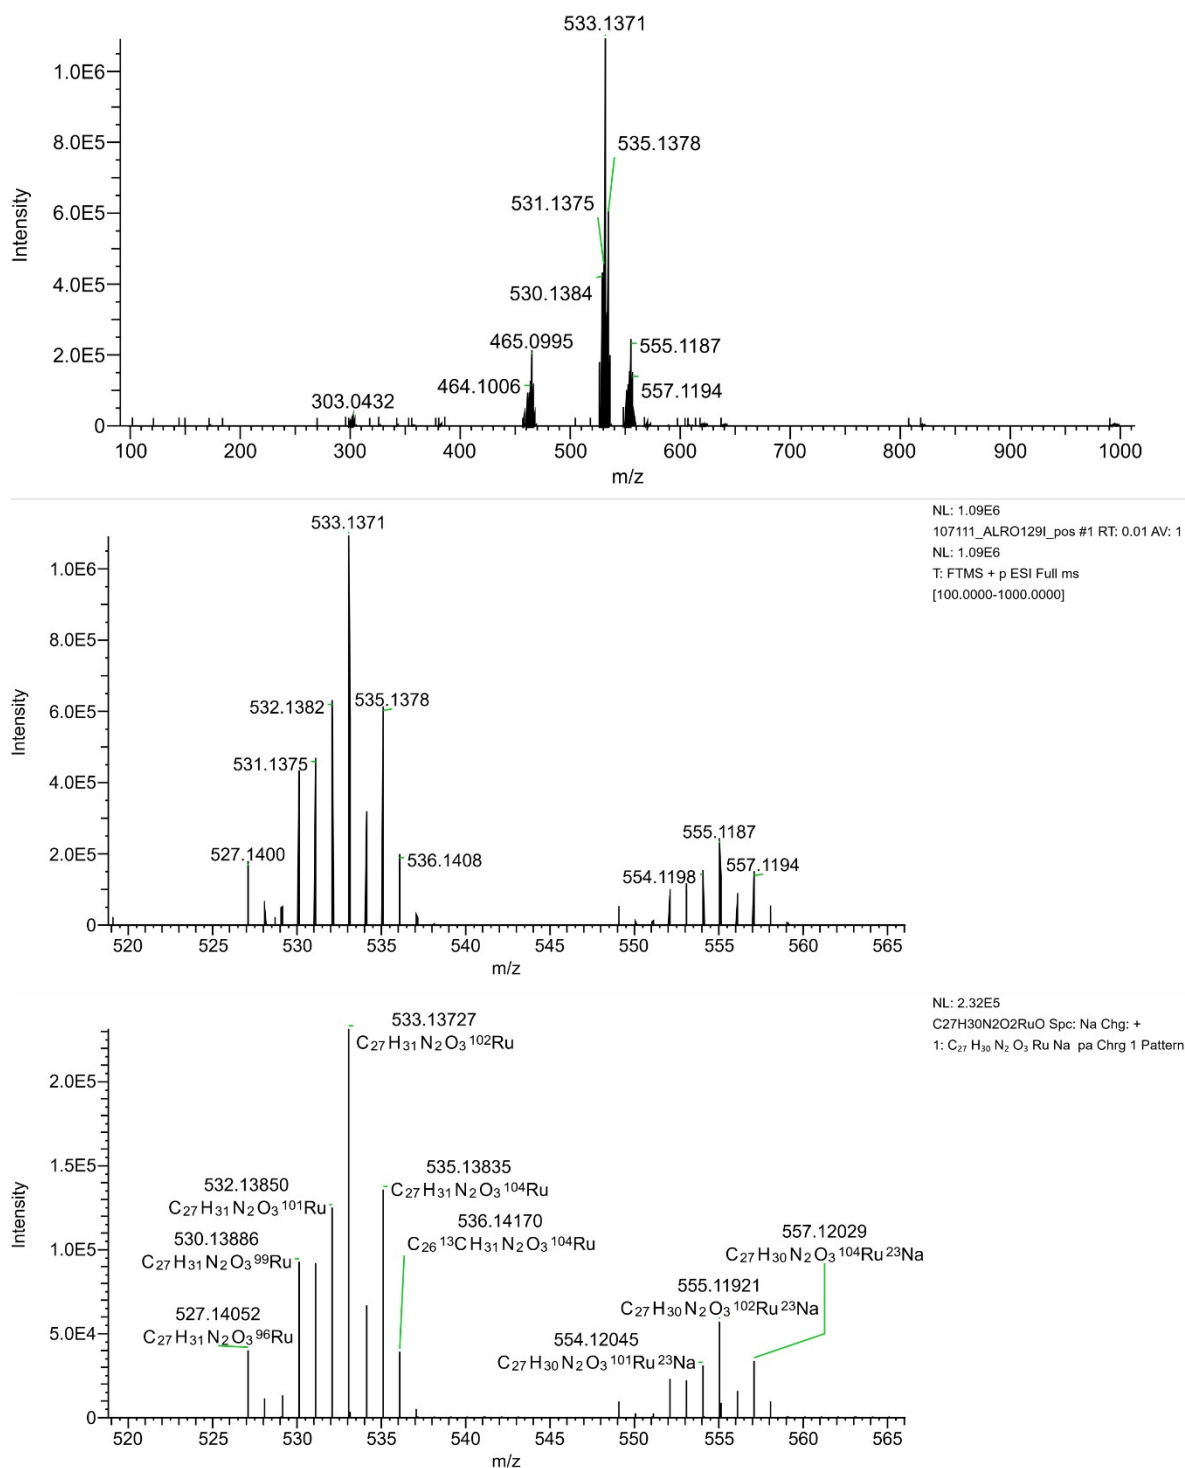

Figure S21: Mass spectrum of complex **1c**.

2.1.4 [(3-(tert-butyl)-1-(1H- $\kappa$ N2-pyrazol-1-yl)-4-oxo-1,4-dihydronaphthalene-1,2-bis(olato)- $\kappa$ O1- $\kappa$ O2)( $\eta$ 6-p-cymene)ruthenium(II)]: **1d**

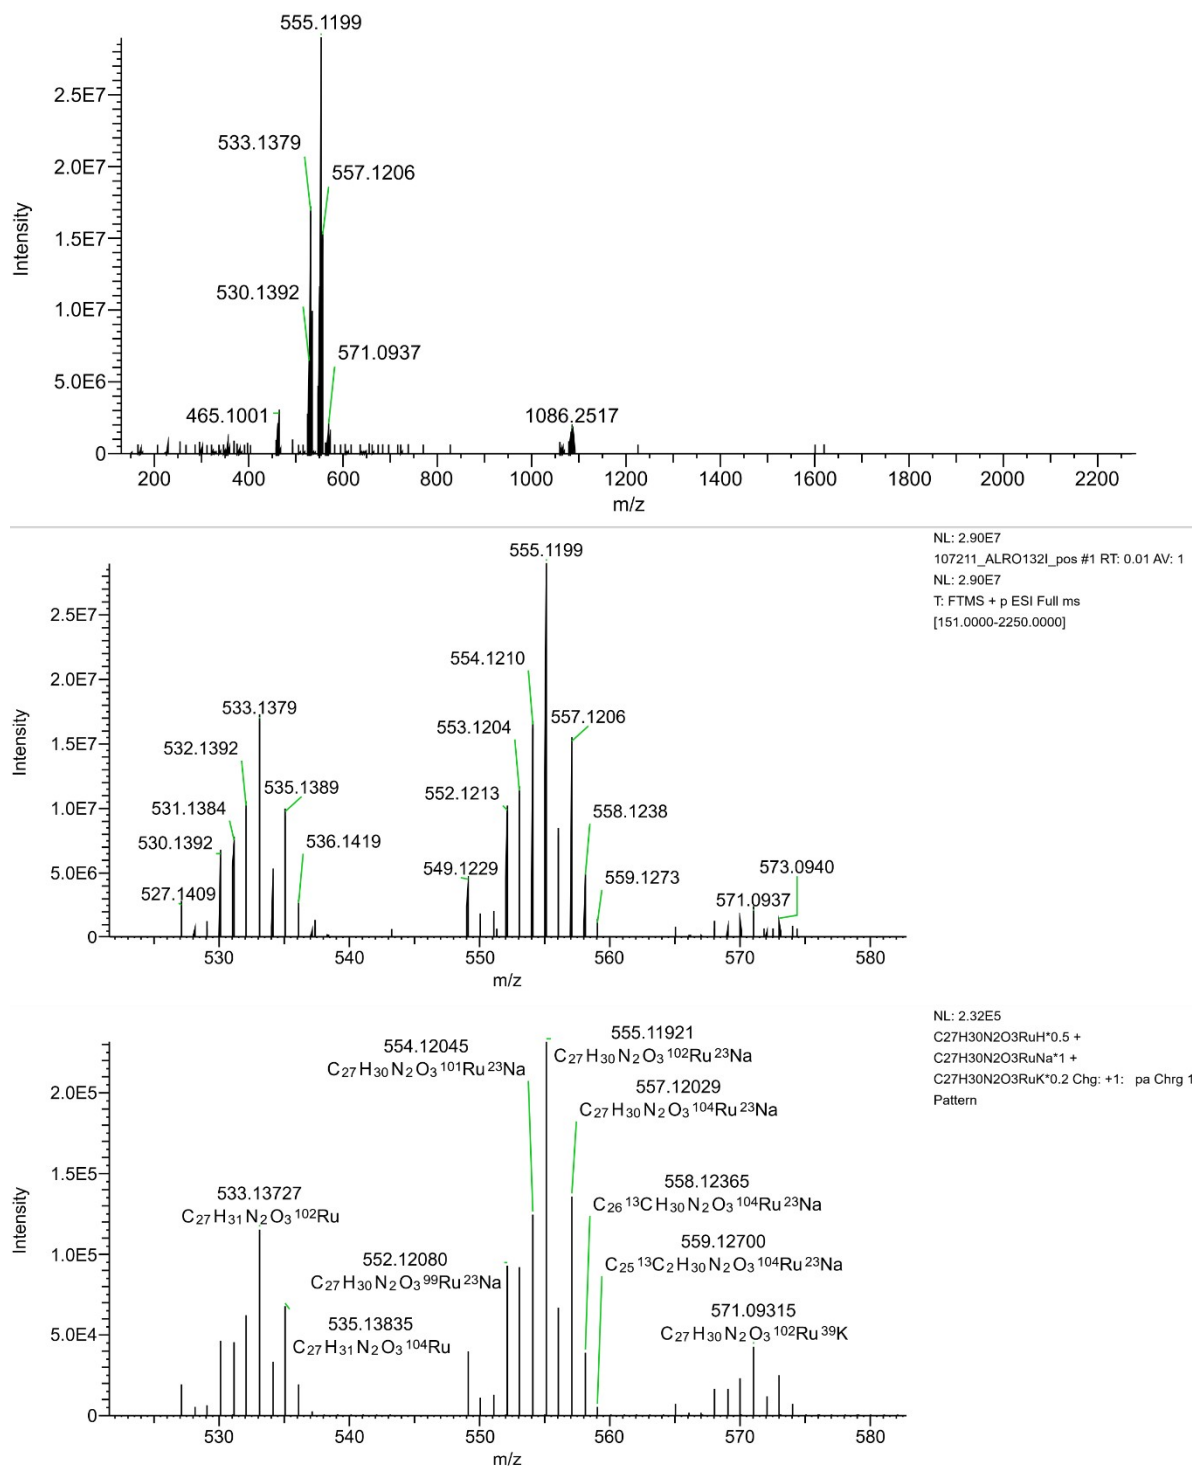

Figure S22: Mass spectrum of complex **1d**.

2.1.5 [(3-Neopentyl-1-(1H- $\kappa$ N2-pyrazol-1-yl)-4-oxo-1,4-dihydronaphthalene-1,2-bis(olato)- $\kappa$ O1- $\kappa$ O2)( $\eta^6$ -*p*-cymene)ruthenium(II)]: **1e**

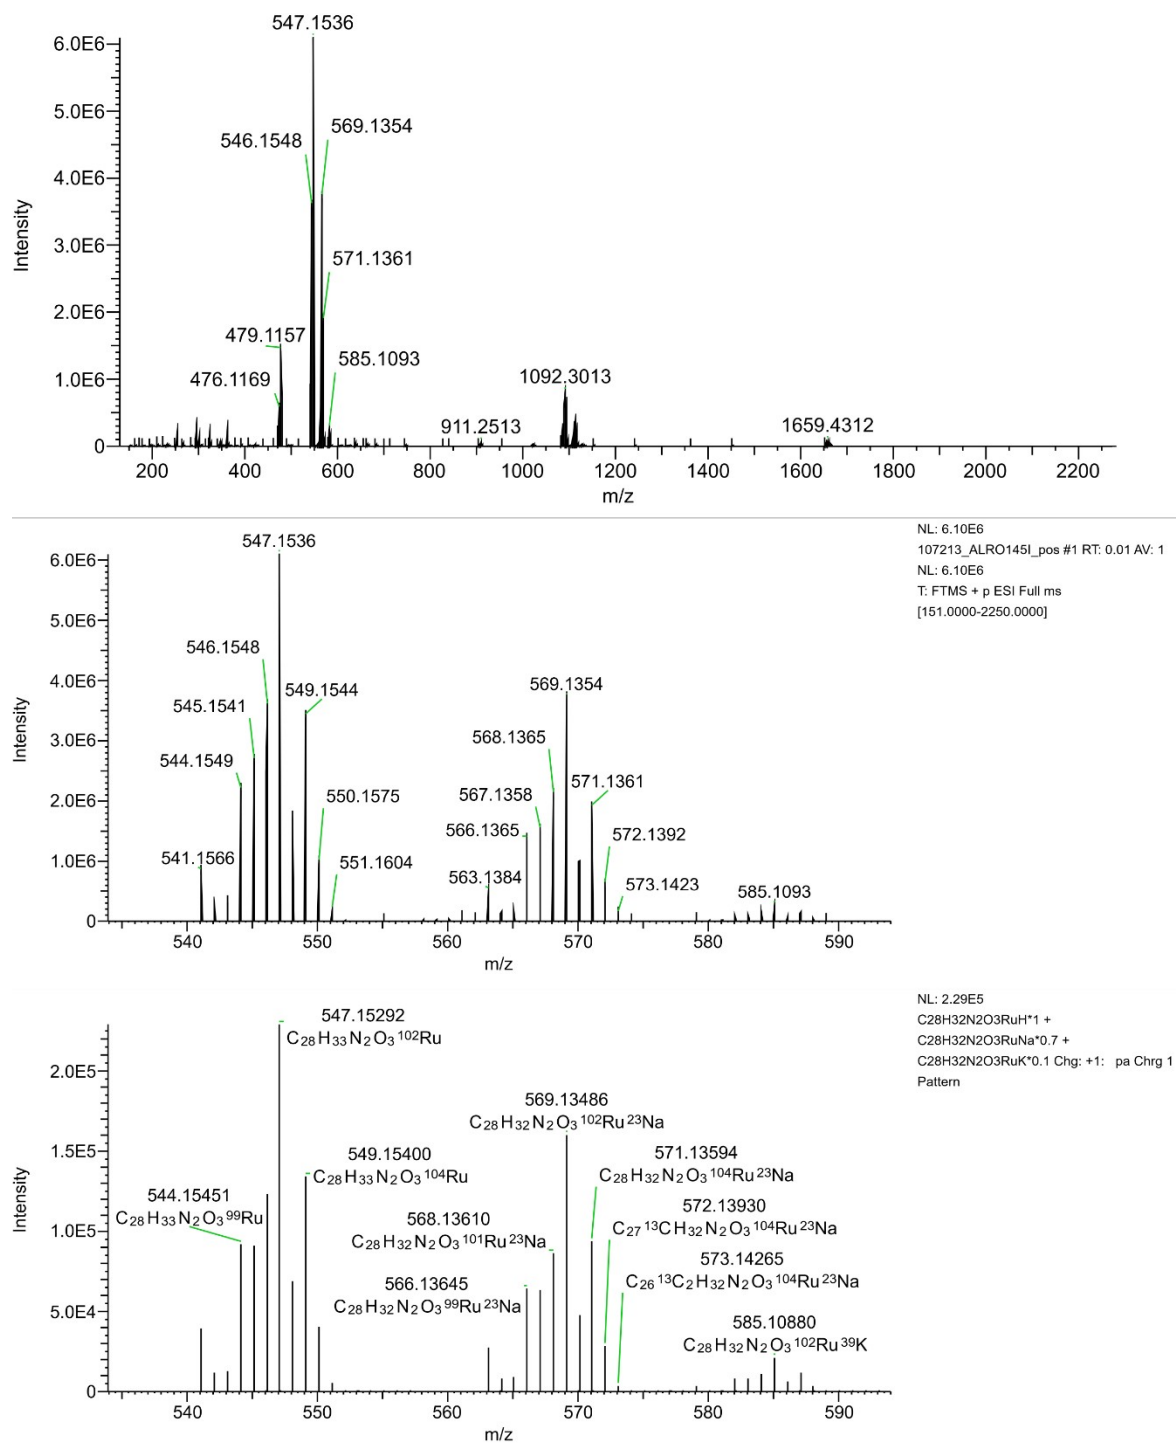

Figure S23: Mass spectrum of complex **1e**.

2.1.6 [(3-(2-Ethylbutyl)-1-(1H- $\kappa$ N2-pyrazol-1-yl)-4-oxo-1,4-dihydronaphthalene-1,2-bis(olato)- $\kappa$ O1- $\kappa$ O2)( $\eta^6$ -*p*-cymene)ruthenium(II)]: **1f**

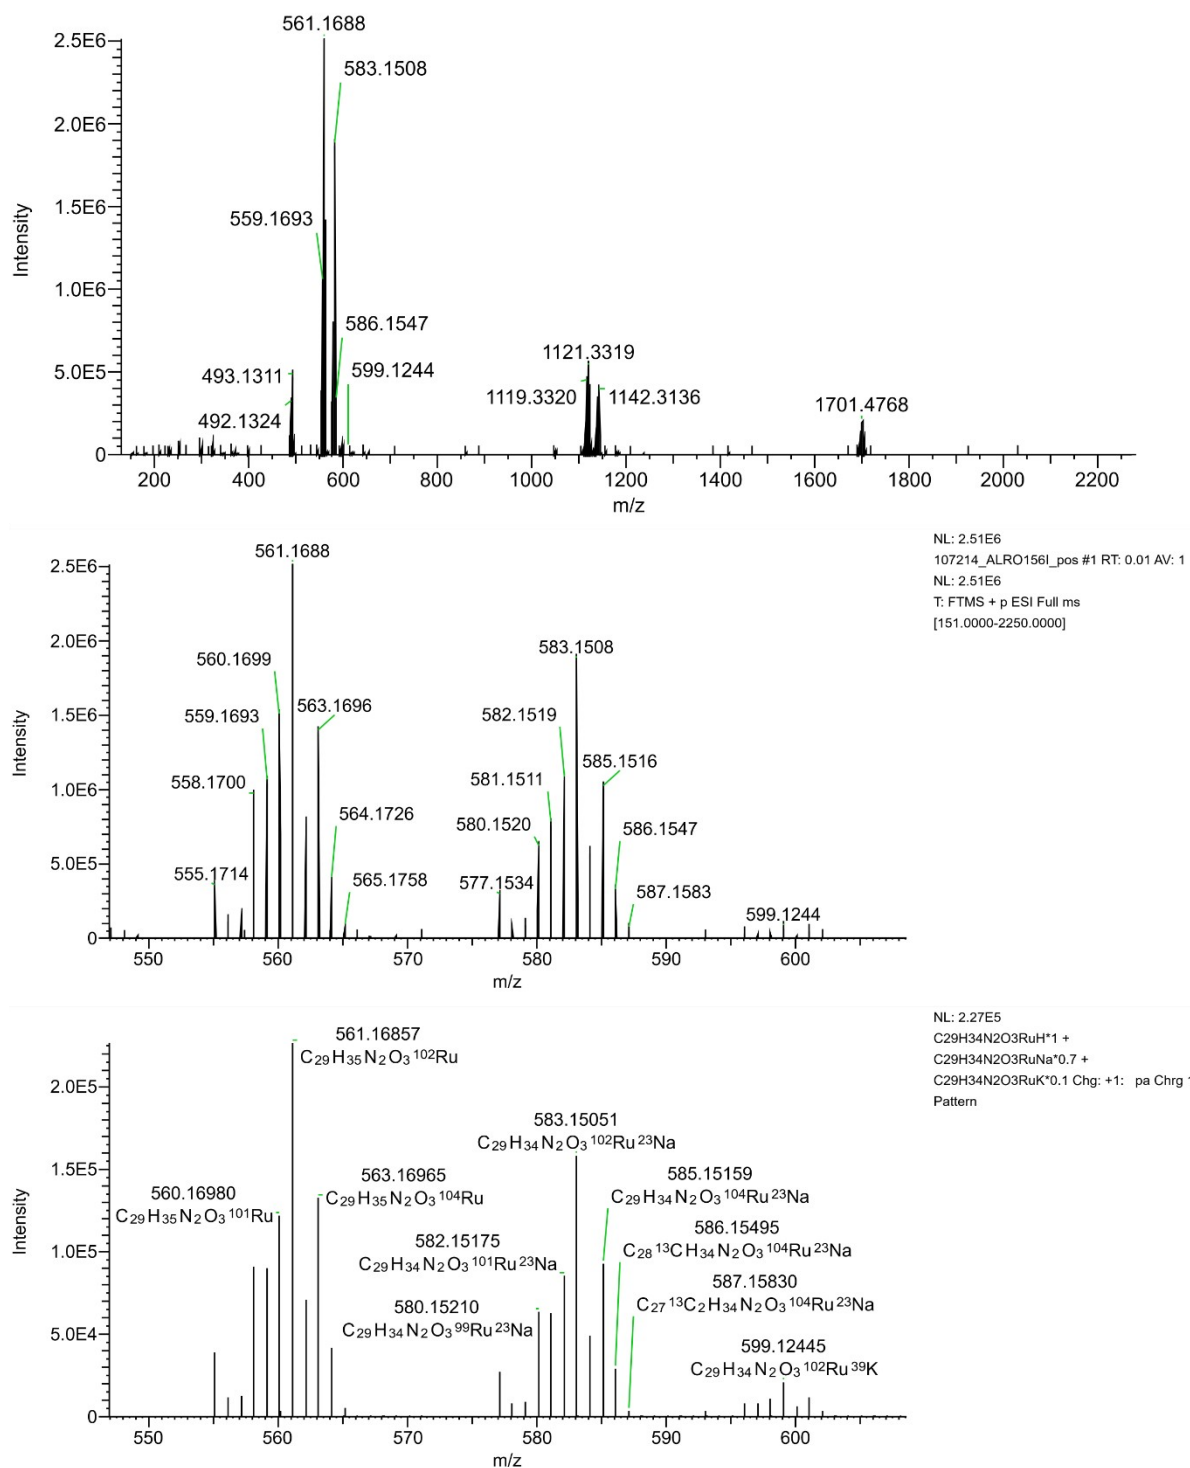

Figure S24: Mass spectrum of complex **1f**.

2.1.7 [(3-Propyl-1-(1H- $\kappa$ N2-pyrazol-1-yl)-4-oxo-1,4-dihydronaphthalene-1,2-bis(olato)- $\kappa$ O1- $\kappa$ O2)( $\eta^6$ -*p*-cymene)osmium(II)]: **2a**

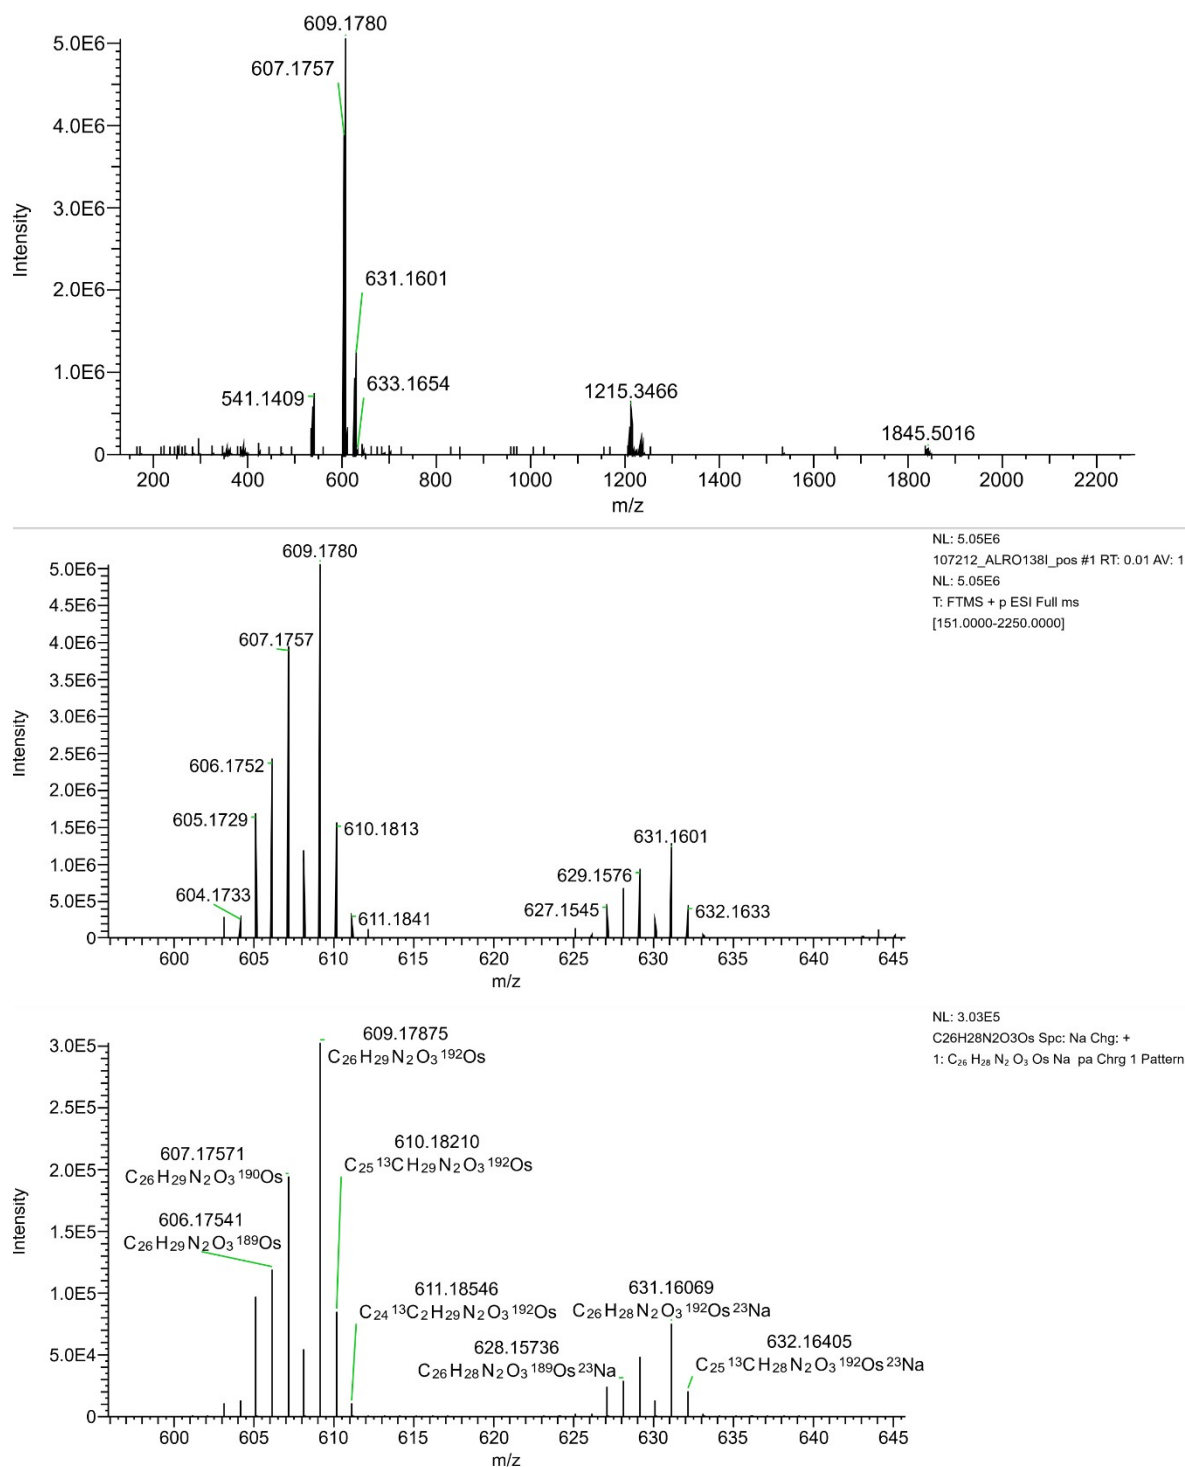

2.1.8 [(3-Butyl-1-(1H- $\kappa$ N2-pyrazol-1-yl)-4-oxo-1,4-dihydronaphthalene-1,2-bis(olato)- $\kappa$ O1- $\kappa$ O2)( $\eta^6$ -*p*-cymene)osmium(II)]: **2b**

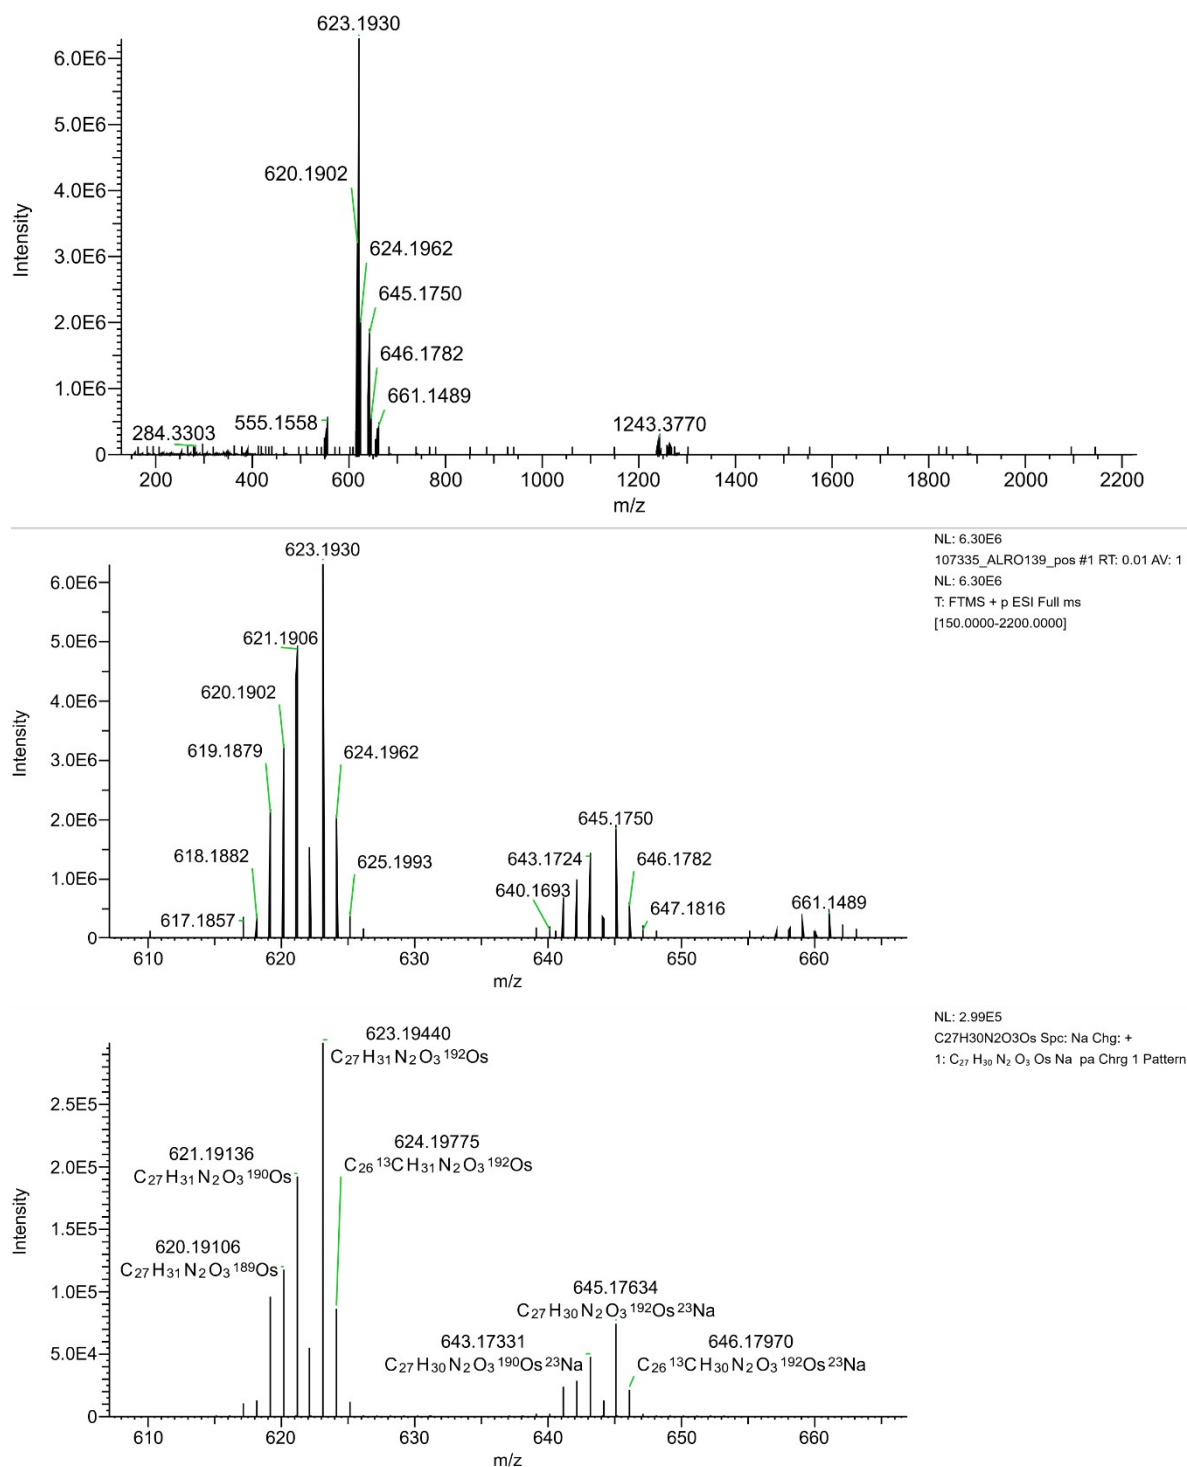



2.1.9 [(3-Isobutyl-1-(1H- $\kappa$ N2-pyrazol-1-yl)-4-oxo-1,4-dihydronaphthalene-1,2-bis(olato)- $\kappa$ O1- $\kappa$ O2)( $\eta^6$ -*p*-cymene)osmium(II)]: **2c**

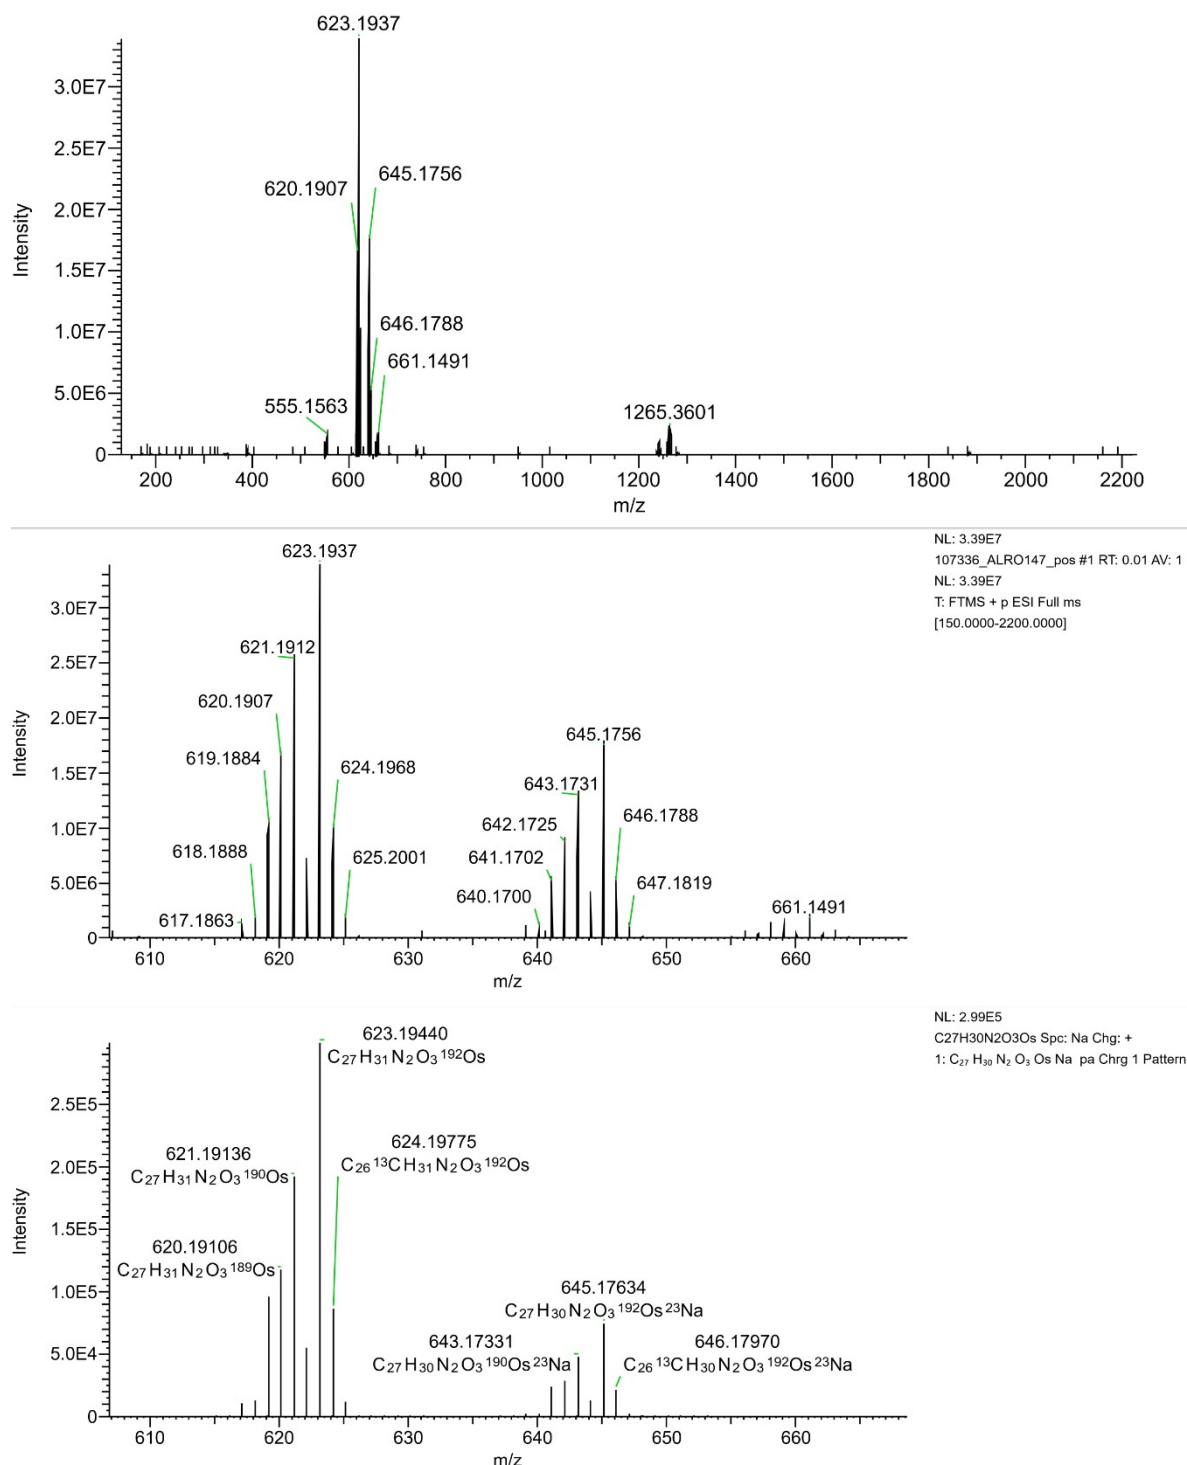

2.1.10 [(3-(*tert*-butyl)-1-(1H- $\kappa$ N2-pyrazol-1-yl)-4-oxo-1,4-dihydronaphthalene-1,2-bis(olato)- $\kappa$ O1- $\kappa$ O2)( $\eta^6$ -*p*-cymene)osmium(II)]: **2d**

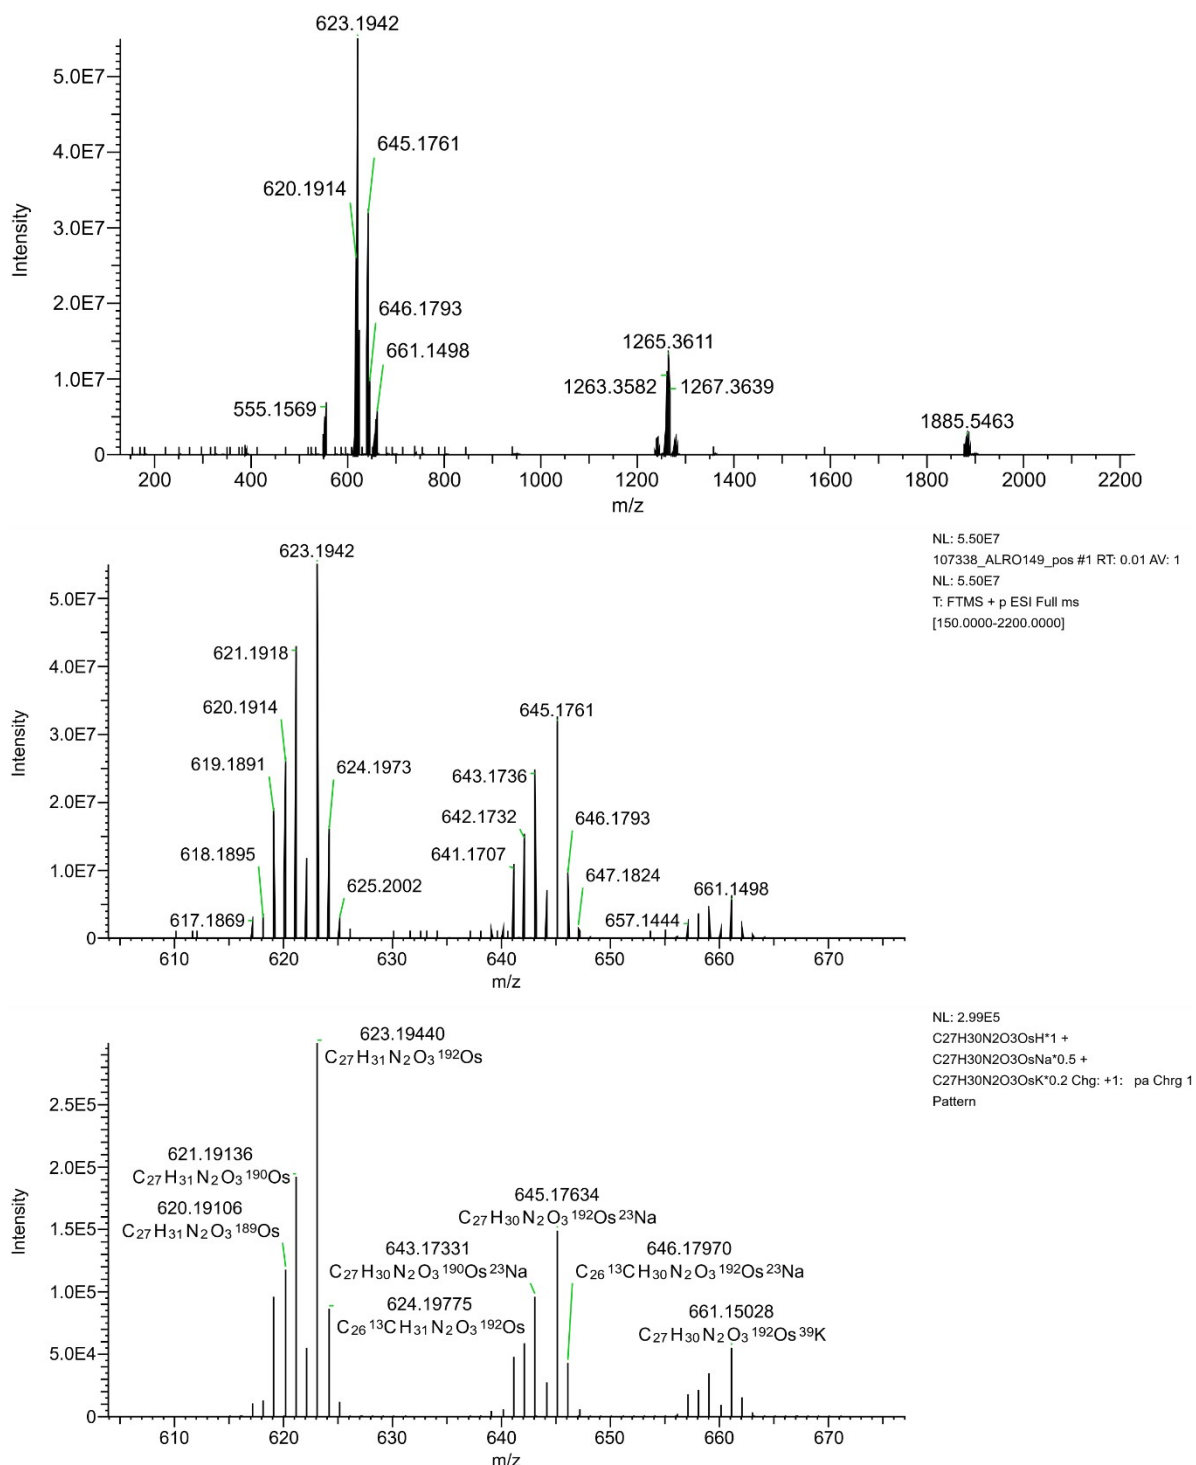

2.1.11 [(3-Neopentyl-1-(1H- $\kappa$ N2-pyrazol-1-yl)-4-oxo-1,4-dihydronaphthalene-1,2-bis(olato)- $\kappa$ O1- $\kappa$ O2)( $\eta^6$ -p-cymene)osmium(II)]: **2e**

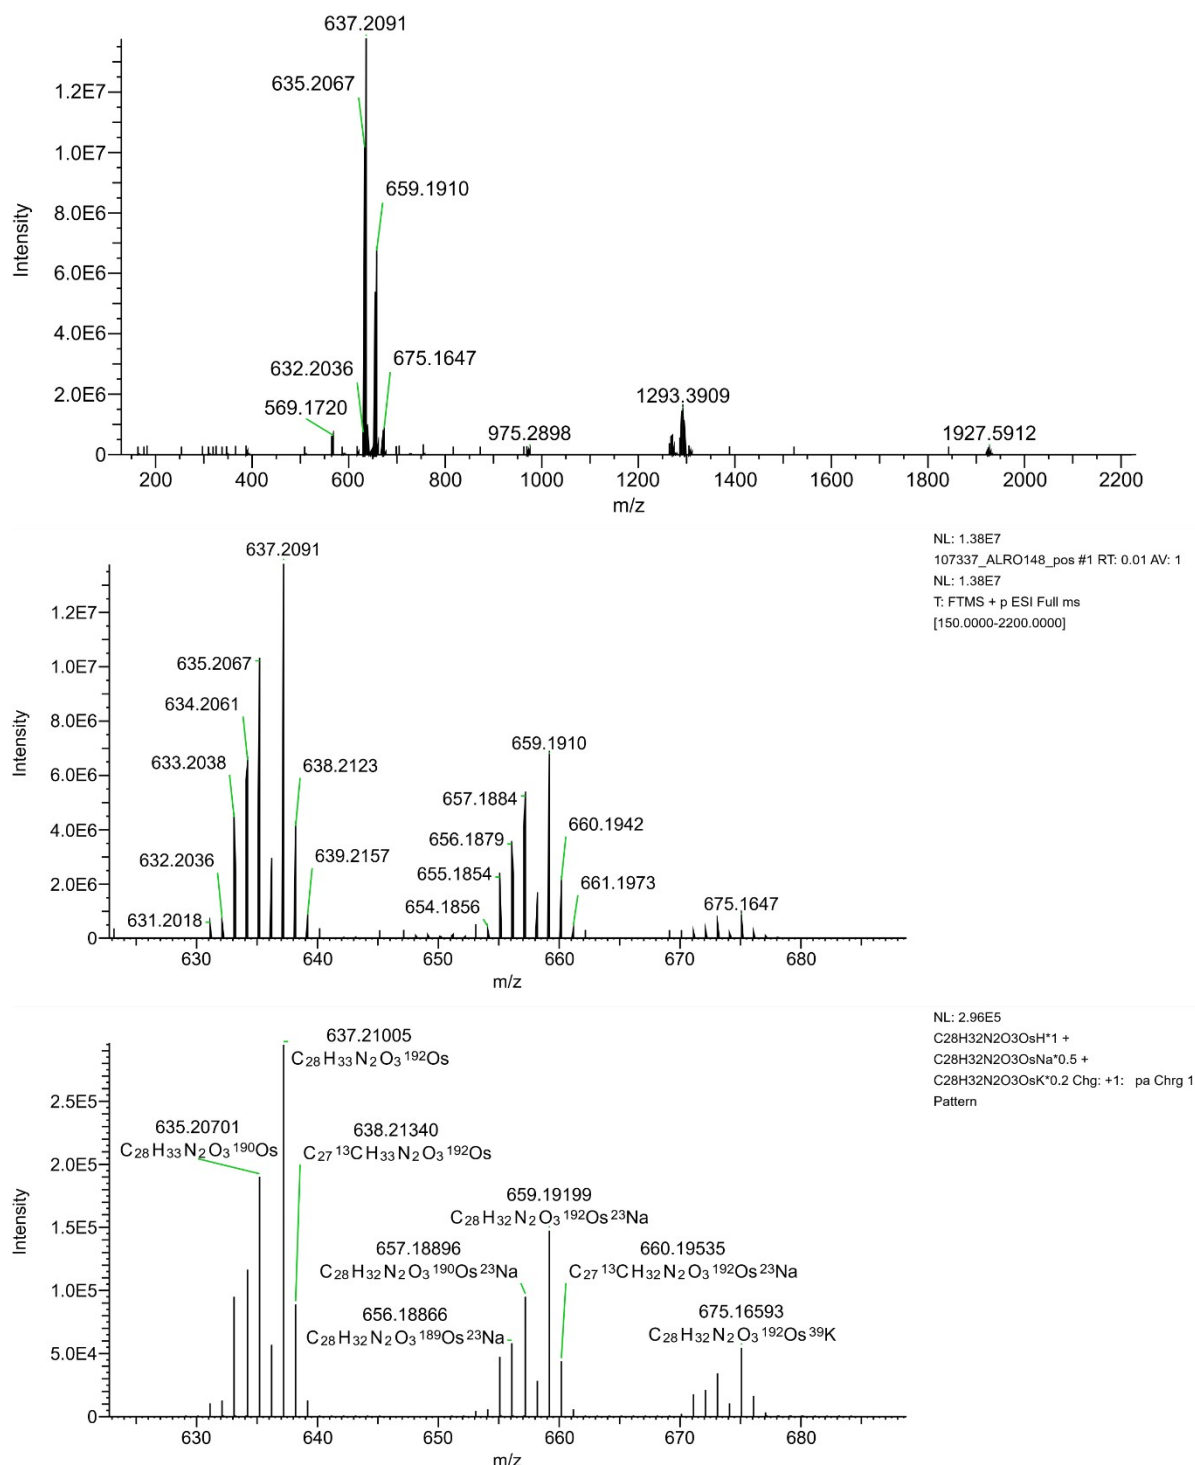

Figure S29: Mass spectrum of complex **2e**.

2.1.12 [(3-(2-Ethylbutyl)-1-(1H- $\kappa$ N2-pyrazol-1-yl)-4-oxo-1,4-dihydronaphthalene-1,2-bis(olato)- $\kappa$ O1- $\kappa$ O2)( $\eta^6$ -*p*-cymene)osmium(II)]: **2f**

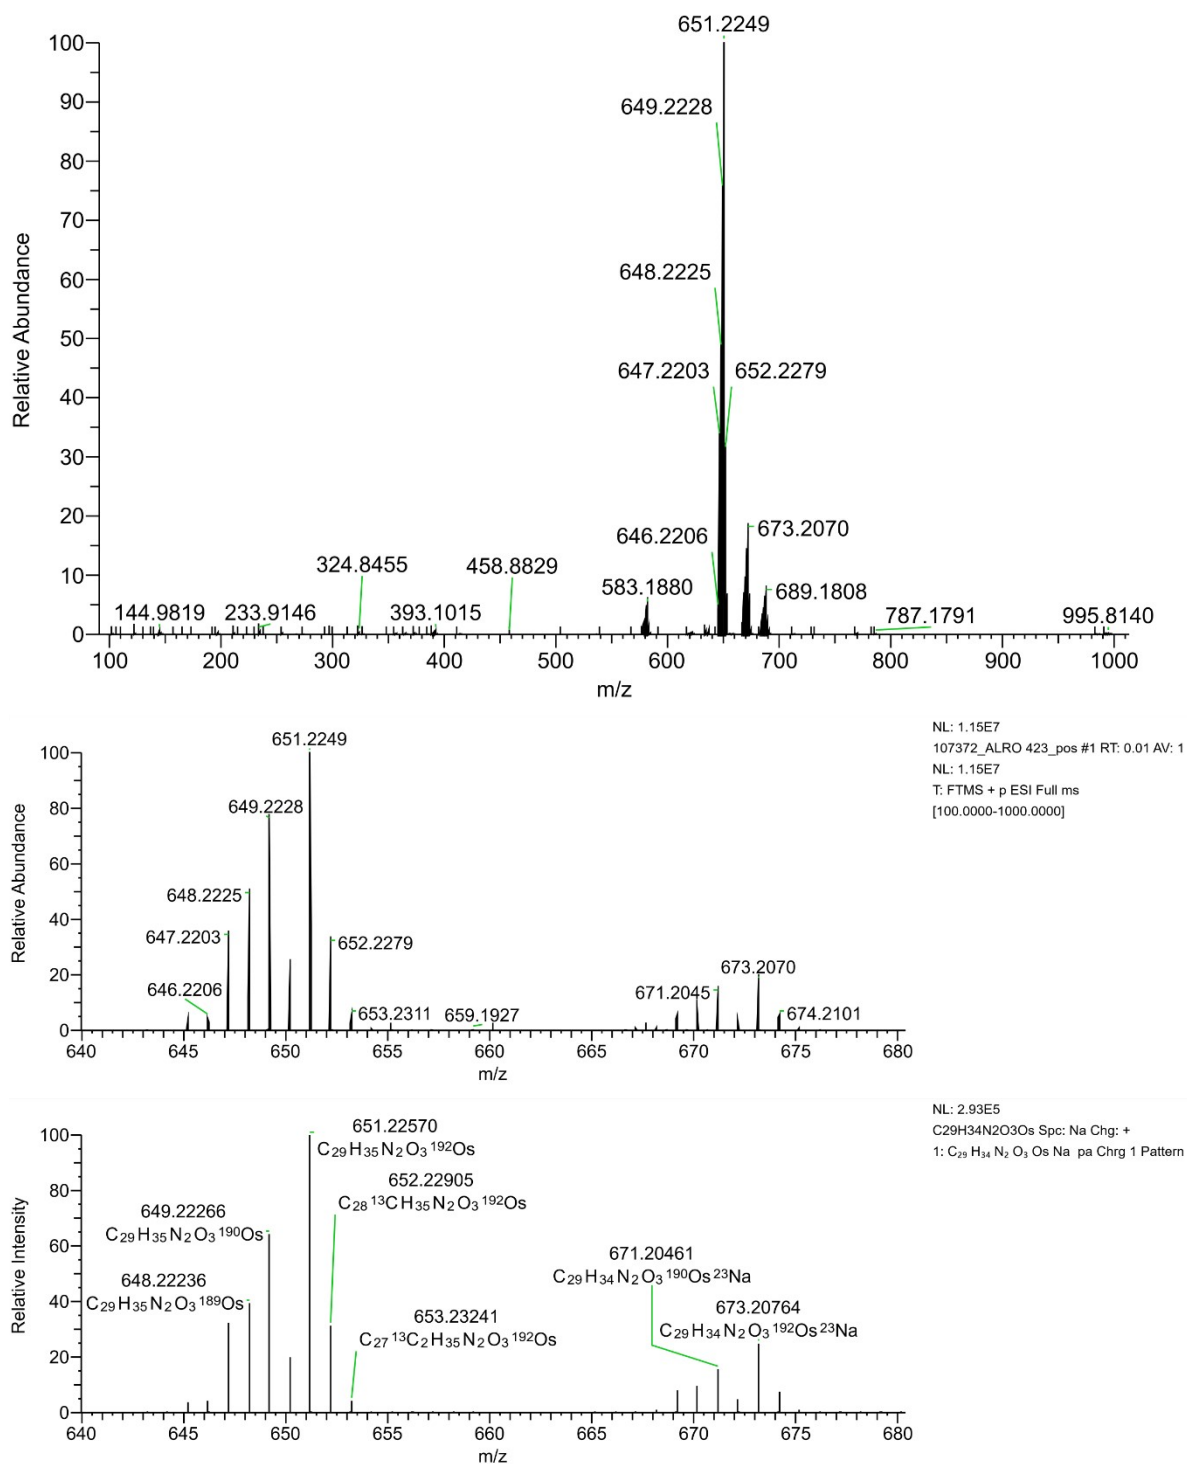

Figure S30: Mass spectrum of complex **2f**.

### 3 X-ray crystallography data

Single crystals were grown from DCM/toluene/diethyl ether *via* vapor diffusion.

For all samples, computation of molecular graphics, computing of publication material, we used Olex2 1.5-alpha (Dolomanov *et al.*, 2009) and the computing of structure refinement was done *via* SHELXL 2018/3 (Sheldrick, 2015).

#### 3.1.1 [(3-Propyl-1-(1H- $\kappa$ N2-pyrazol-1-yl)-4-oxo-1,4-dihydronaphtalene-1,2-bis(olato)- $\kappa$ O1- $\kappa$ O2)( $\eta^6$ -*p*-cymene)ruthenium(II)]: **1a** (CCDC 2448265)

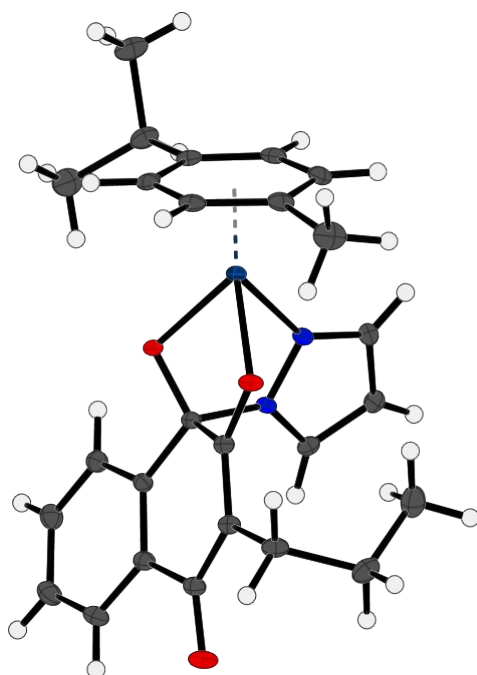

Figure S31: Crystal structure of complex **1a**.

A suitable crystal was selected and analyzed on a Bruker D8 Venture diffractometer. For computing of cell refinement and data collection the APEX4 SUITE was used. This is also valid for all other measurements on BRUKER instruments. The crystal was kept at 100 K during data collection. Using Olex2, the structure was solved with the SHELXS structure solution program using Direct Methods.

Table S1: Sample and crystal data of **1a**.

|                          |                                                                  |
|--------------------------|------------------------------------------------------------------|
| <b>Empirical formula</b> | C <sub>26</sub> H <sub>28</sub> N <sub>2</sub> O <sub>3</sub> Ru |
| <b>Formula weight</b>    | 517.57                                                           |
| <b>Temperature/K</b>     | 100.00                                                           |
| <b>Crystal system</b>    | triclinic                                                        |
| <b>Space group</b>       | P-1                                                              |
| <b>a/Å</b>               | 10.1522(3)                                                       |
| <b>b/Å</b>               | 10.4123(4)                                                       |
| <b>c/Å</b>               | 12.5901(4)                                                       |

|                                                |                                                                    |
|------------------------------------------------|--------------------------------------------------------------------|
| $\alpha/^\circ$                                | 102.837(2)                                                         |
| $\beta/^\circ$                                 | 92.546(2)                                                          |
| $\gamma/^\circ$                                | 118.4480(10)                                                       |
| Volume/ $\text{\AA}^3$                         | 1123.26(7)                                                         |
| Z                                              | 2                                                                  |
| $\rho_{\text{calc}}/\text{g/cm}^3$             | 1.530                                                              |
| $\mu/\text{mm}^{-1}$                           | 0.729                                                              |
| F(000)                                         | 532.0                                                              |
| Crystal size/ $\text{mm}^3$                    | $0.15 \times 0.12 \times 0.1$                                      |
| Radiation                                      | MoK $\alpha$ ( $\lambda = 0.71073$ )                               |
| 2 $\theta$ range for data collection/ $^\circ$ | 4.63 to 60.19                                                      |
| Index ranges                                   | $-14 \leq h \leq 14$ , $-14 \leq k \leq 14$ , $-17 \leq l \leq 17$ |
| Reflections collected                          | 36115                                                              |
| Independent reflections                        | 6499 [ $R_{\text{int}} = 0.0298$ , $R_{\text{sigma}} = 0.0195$ ]   |
| Data/restraints/parameters                     | 6499/0/293                                                         |
| Goodness-of-fit on $F^2$                       | 1.036                                                              |
| Final R indexes [ $I \geq 2\sigma(I)$ ]        | $R_1 = 0.0187$ , $wR_2 = 0.0473$                                   |
| Final R indexes [all data]                     | $R_1 = 0.0202$ , $wR_2 = 0.0479$                                   |
| Largest diff. peak/hole / $e \text{ \AA}^{-3}$ | 0.63/-0.69                                                         |

3.1.2 [(3-Butyl-1-(1H- $\kappa$ N2-pyrazol-1-yl)-4-oxo-1,4-dihydronaphthalene-1,2-bis(olato)- $\kappa$ O1- $\kappa$ O2)( $\eta^6$ -*p*-cymene)ruthenium(II)]: **1b** (CCDC 2422950)

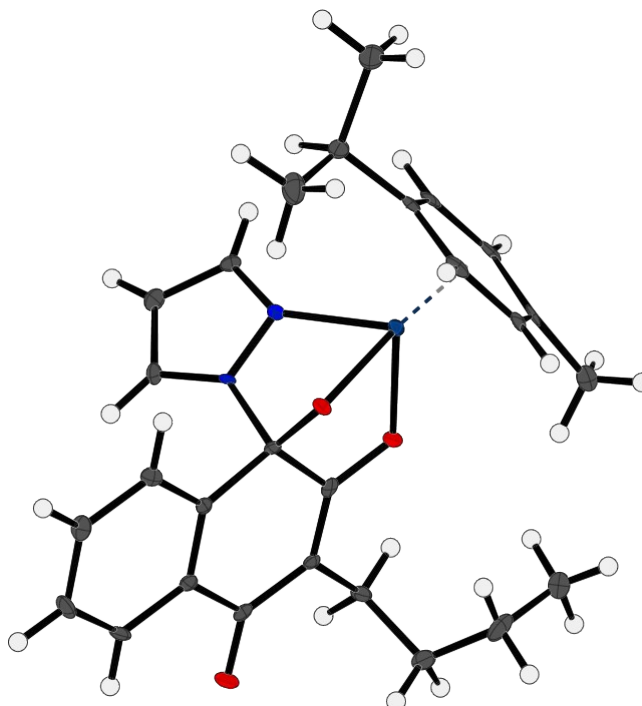

Figure S32: Crystal structure of complex **1b**.

A suitable crystal was selected and analyzed on a STOE STADIVARI diffractometer. For computing of cell refinement, X-Area Recipe 2.0.2 (STOE, 2024) was used. Computing of data collection was conducted *via* X-Area Pilatus3\_SV 1.31.194.0 (STOE, 2023). This is also valid for all other measurements on the STOE STADIVARI. The crystal was kept at 100 K during data collection. Using Olex2, the structure was solved with the SHELXS structure solution program using Direct Methods.

Table S2: Sample and crystal data of **1b**.

|                          |                                                                  |
|--------------------------|------------------------------------------------------------------|
| <b>Empirical formula</b> | C <sub>27</sub> H <sub>30</sub> N <sub>2</sub> O <sub>3</sub> Ru |
| <b>Formula weight</b>    | 531.60                                                           |
| <b>Temperature/K</b>     | 100                                                              |
| <b>Crystal system</b>    | monoclinic                                                       |
| <b>Space group</b>       | P2 <sub>1</sub> /n                                               |
| <b>a/Å</b>               | 9.7903(5)                                                        |
| <b>b/Å</b>               | 17.4298(9)                                                       |
| <b>c/Å</b>               | 13.5228(7)                                                       |
| <b>α/°</b>               | 90                                                               |
| <b>β/°</b>               | 94.398(4)                                                        |

|                                                                           |                                                               |
|---------------------------------------------------------------------------|---------------------------------------------------------------|
| <b><math>\gamma/^\circ</math></b>                                         | 90                                                            |
| <b>Volume/<math>\text{\AA}^3</math></b>                                   | 2300.8(2)                                                     |
| <b>Z</b>                                                                  | 4                                                             |
| <b><math>\rho_{\text{calc}}/\text{g/cm}^3</math></b>                      | 1.535                                                         |
| <b><math>\mu/\text{mm}^{-1}</math></b>                                    | 0.714                                                         |
| <b>F(000)</b>                                                             | 1096.0                                                        |
| <b>Crystal size/<math>\text{mm}^3</math></b>                              | $0.26 \times 0.133 \times 0.07$                               |
| <b>Radiation</b>                                                          | MoK $\alpha$ ( $\lambda = 0.71073$ )                          |
| <b>2<math>\Theta</math> range for data collection/<math>^\circ</math></b> | 3.82 to 54.966                                                |
| <b>Index ranges</b>                                                       | $-12 \leq h \leq 11, -22 \leq k \leq 21, -17 \leq l \leq 17$  |
| <b>Reflections collected</b>                                              | 33510                                                         |
| <b>Independent reflections</b>                                            | 5282 [ $R_{\text{int}} = 0.0402, R_{\text{sigma}} = 0.0592$ ] |
| <b>Data/restraints/parameters</b>                                         | 5282/6/302                                                    |
| <b>Goodness-of-fit on <math>F^2</math></b>                                | 0.961                                                         |
| <b>Final R indexes [<math> I  \geq 2\sigma(I)</math>]</b>                 | $R_1 = 0.0258, wR_2 = 0.0560$                                 |
| <b>Final R indexes [all data]</b>                                         | $R_1 = 0.0355, wR_2 = 0.0567$                                 |



3.1.3 [(3-Isobutyl-1-(1H- $\kappa$ N2-pyrazol-1-yl)-4-oxo-1,4-dihydronaphthalene-1,2-bis(olato)- $\kappa$ O1- $\kappa$ O2)( $\eta^6$ -*p*-cymene)ruthenium(II)]: **1c** (CCDC 2422945)

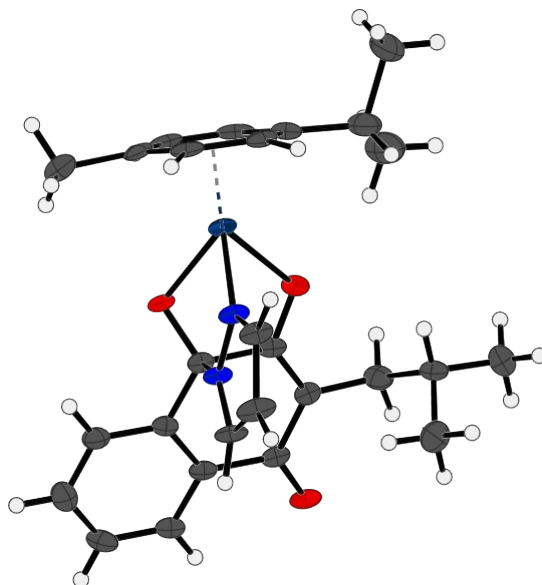

Figure S33: Crystal structure of complex **1c**.

A suitable crystal was selected and analyzed on a STOE STADIVARI diffractometer. The crystal was kept at 100 K during data collection. Using Olex2, the structure was solved with the XT structure solution program using Intrinsic Phasing.

Table S3: Sample and crystal data of **1c**.

|                                                         |                                                                  |
|---------------------------------------------------------|------------------------------------------------------------------|
| <b>Empirical formula</b>                                | C <sub>31</sub> H <sub>40</sub> N <sub>2</sub> O <sub>4</sub> Ru |
| <b>Formula weight</b>                                   | 605.72                                                           |
| <b>Temperature/K</b>                                    | 100                                                              |
| <b>Crystal system</b>                                   | triclinic                                                        |
| <b>Space group</b>                                      | P-1                                                              |
| <b>a/Å</b>                                              | 9.7041(11)                                                       |
| <b>b/Å</b>                                              | 12.6241(15)                                                      |
| <b>c/Å</b>                                              | 14.1057(14)                                                      |
| <b><math>\alpha</math>/°</b>                            | 103.754(8)                                                       |
| <b><math>\beta</math>/°</b>                             | 100.413(8)                                                       |
| <b><math>\gamma</math>/°</b>                            | 112.528(8)                                                       |
| <b>Volume/Å<sup>3</sup></b>                             | 1477.5(3)                                                        |
| <b>Z</b>                                                | 2                                                                |
| <b><math>\rho_{\text{calc}}</math>/g/cm<sup>3</sup></b> | 1.361                                                            |
| <b><math>\mu</math>/mm<sup>-1</sup></b>                 | 0.567                                                            |
| <b>F(000)</b>                                           | 632.0                                                            |
| <b>Crystal size/mm<sup>3</sup></b>                      | 0.13 × 0.073 × 0.03                                              |
| <b>Radiation</b>                                        | MoK $\alpha$ ( $\lambda$ = 0.71073)                              |
| <b>2<math>\theta</math> range for data collection/°</b> | 4.768 to 57.68                                                   |

|                                                                  |                                                               |
|------------------------------------------------------------------|---------------------------------------------------------------|
| <b>Index ranges</b>                                              | $-12 \leq h \leq 12, -16 \leq k \leq 16, -18 \leq l \leq 19$  |
| <b>Reflections collected</b>                                     | 30235                                                         |
| <b>Independent reflections</b>                                   | 7146 [ $R_{\text{int}} = 0.0673, R_{\text{sigma}} = 0.1639$ ] |
| <b>Data/restraints/parameters</b>                                | 7146/395/375                                                  |
| <b>Goodness-of-fit on <math>F^2</math></b>                       | 0.911                                                         |
| <b>Final R indexes [<math>I \geq 2\sigma(I)</math>]</b>          | $R_1 = 0.0433, wR_2 = 0.0808$                                 |
| <b>Final R indexes [all data]</b>                                | $R_1 = 0.0832, wR_2 = 0.0852$                                 |
| <b>Largest diff. peak/hole / <math>e \text{ \AA}^{-3}</math></b> | 0.98/-1.38                                                    |

3.1.4 [(3-(tert-butyl)-1-(1H- $\kappa$ N2-pyrazol-1-yl)-4-oxo-1,4-dihydronaphthalene-1,2-bis(olato)- $\kappa$ O1- $\kappa$ O2)( $\eta$ 6-p-cymene)ruthenium(II)]: **1d** (CCDC 2448267)

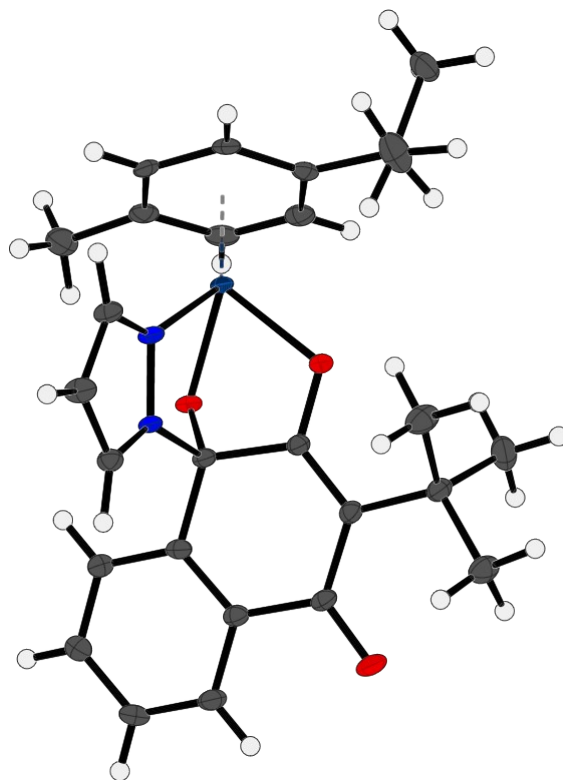

Figure S34: Crystal structure of complex **1d**.

A suitable crystal was selected and analyzed on a Bruker D8 Venture diffractometer. The crystal was kept at 100.00 K during data collection. Using Olex2, the structure was solved with the XS structure solution program using Direct Methods.

Table S4: Sample and crystal data of **1d**.

|                              |                                                                  |
|------------------------------|------------------------------------------------------------------|
| <b>Empirical formula</b>     | C <sub>27</sub> H <sub>30</sub> N <sub>2</sub> O <sub>3</sub> Ru |
| <b>Formula weight</b>        | 531.60                                                           |
| <b>Temperature/K</b>         | 100.00                                                           |
| <b>Crystal system</b>        | triclinic                                                        |
| <b>Space group</b>           | P-1                                                              |
| <b>a/Å</b>                   | 9.7915(18)                                                       |
| <b>b/Å</b>                   | 9.8922(18)                                                       |
| <b>c/Å</b>                   | 13.6713(16)                                                      |
| <b><math>\alpha</math>/°</b> | 101.738(8)                                                       |
| <b><math>\beta</math>/°</b>  | 108.241(8)                                                       |
| <b><math>\gamma</math>/°</b> | 96.812(9)                                                        |

|                                                         |                                                                |
|---------------------------------------------------------|----------------------------------------------------------------|
| <b>Volume/Å<sup>3</sup></b>                             | 1207.5(3)                                                      |
| <b>Z</b>                                                | 2                                                              |
| <b><math>\rho_{\text{calc}}</math>g/cm<sup>3</sup></b>  | 1.462                                                          |
| <b><math>\mu</math>/mm<sup>-1</sup></b>                 | 0.680                                                          |
| <b>F(000)</b>                                           | 548.0                                                          |
| <b>Crystal size/mm<sup>3</sup></b>                      | 0.2 × 0.15 × 0.05                                              |
| <b>Radiation</b>                                        | MoK $\alpha$ ( $\lambda$ = 0.71073)                            |
| <b>2<math>\Theta</math> range for data collection/°</b> | 4.288 to 56.562                                                |
| <b>Index ranges</b>                                     | -13 ≤ h ≤ 13, -13 ≤ k ≤ 13, -18 ≤ l ≤ 18                       |
| <b>Reflections collected</b>                            | 54782                                                          |
| <b>Independent reflections</b>                          | 5994 [ $R_{\text{int}}$ = 0.0314, $R_{\text{sigma}}$ = 0.0160] |
| <b>Data/restraints/parameters</b>                       | 5994/0/304                                                     |
| <b>Goodness-of-fit on <math>F^2</math></b>              | 1.061                                                          |
| <b>Final R indexes [<math>I \geq 2\sigma(I)</math>]</b> | $R_1$ = 0.0206, $wR_2$ = 0.0504                                |
| <b>Final R indexes [all data]</b>                       | $R_1$ = 0.0222, $wR_2$ = 0.0509                                |
| <b>Largest diff. peak/hole / e Å<sup>-3</sup></b>       | 1.34/-0.75                                                     |

3.1.5 [(3-Neopentyl-1-(1H- $\kappa$ N2-pyrazol-1-yl)-4-oxo-1,4-dihydronaphthalene-1,2-bis(olato)- $\kappa$ O1- $\kappa$ O2)( $\eta^6$ -*p*-cymene)ruthenium(II)]: **1e** (CCDC 2469756)

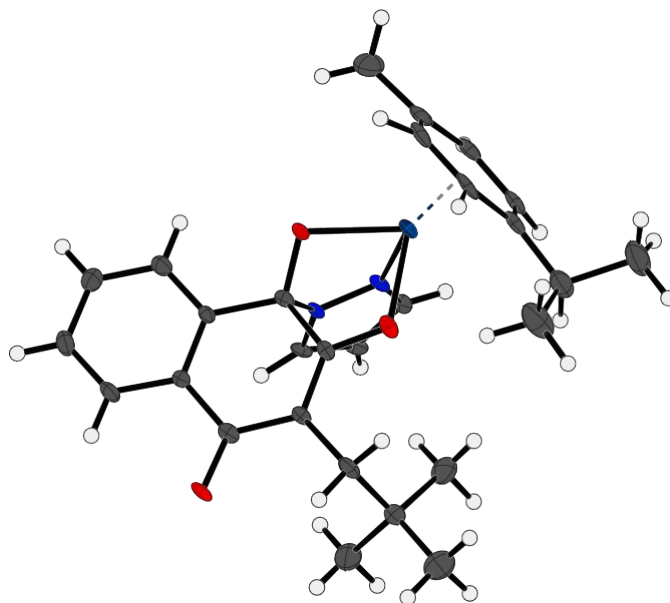

Figure S35: Crystal structure of complex **1e**.

A suitable crystal was selected and analyzed on a STOE STADIVARI diffractometer. The crystal was kept at 100.15 K during data collection. Using Olex2, the structure was solved with the XS structure solution program using Direct Methods.

Table S5: Sample and crystal data of **1e**.

|                                        |                                                                  |
|----------------------------------------|------------------------------------------------------------------|
| Empirical formula                      | C <sub>32</sub> H <sub>42</sub> N <sub>2</sub> O <sub>4</sub> Ru |
| Formula weight                         | 619.74                                                           |
| Temperature/K                          | 100.15                                                           |
| Crystal system                         | triclinic                                                        |
| Space group                            | P-1                                                              |
| <i>a</i> /Å                            | 9.6961(5)                                                        |
| <i>b</i> /Å                            | 12.7169(8)                                                       |
| <i>c</i> /Å                            | 14.3705(9)                                                       |
| $\alpha$ /°                            | 103.068(5)                                                       |
| $\beta$ /°                             | 102.083(5)                                                       |
| $\gamma$ /°                            | 111.797(4)                                                       |
| Volume/Å <sup>3</sup>                  | 1516.05(17)                                                      |
| <i>Z</i>                               | 2                                                                |
| $\rho_{\text{calc}}$ /cm <sup>3</sup>  | 1.358                                                            |
| $\mu$ /mm <sup>-1</sup>                | 0.555                                                            |
| <i>F</i> (000)                         | 648.0                                                            |
| Crystal size/mm <sup>3</sup>           | 0.2 × 0.093 × 0.02                                               |
| Radiation                              | MoK $\alpha$ ( $\lambda$ = 0.71073)                              |
| 2 $\theta$ range for data collection/° | 5.688 to 57.222                                                  |

|                                                |                                                               |
|------------------------------------------------|---------------------------------------------------------------|
| Index ranges                                   | $-10 \leq h \leq 12, -16 \leq k \leq 16, -19 \leq l \leq 18$  |
| Reflections collected                          | 35415                                                         |
| Independent reflections                        | 7285 [ $R_{\text{int}} = 0.0694, R_{\text{sigma}} = 0.1394$ ] |
| Data/restraints/parameters                     | 7285/154/360                                                  |
| Goodness-of-fit on $F^2$                       | 0.951                                                         |
| Final R indexes [ $ I  \geq 2\sigma(I)$ ]      | $R_1 = 0.0423, wR_2 = 0.0762$                                 |
| Final R indexes [all data]                     | $R_1 = 0.0831, wR_2 = 0.0823$                                 |
| Largest diff. peak/hole / $e \text{ \AA}^{-3}$ | 1.19/-2.33                                                    |

3.1.6 [(3-(2-Ethylbutyl)-1-(1H- $\kappa$ N2-pyrazol-1-yl)-4-oxo-1,4-dihydronaphthalene-1,2-bis(olato)- $\kappa$ O1- $\kappa$ O2)( $\eta^6$ -*p*-cymene)ruthenium(II)]: **1f** (CCDC 2448913)

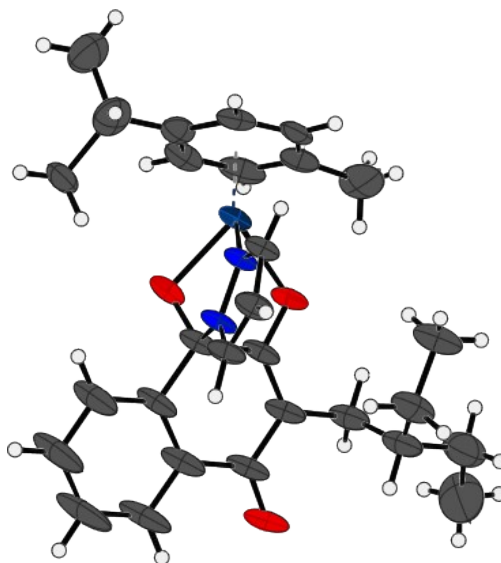

Figure S36: Crystal structure of complex **1f**.

A suitable crystal was selected and analyzed on a STOE STADIVARI diffractometer. The crystal was kept at 100 K during data collection. Using Olex2, the structure was solved with the SHELXT structure solution program using Intrinsic Phasing.

Table S6: Sample and crystal data of **1f**.

|                                                         |                                                                  |
|---------------------------------------------------------|------------------------------------------------------------------|
| <b>Empirical formula</b>                                | C <sub>29</sub> H <sub>34</sub> N <sub>2</sub> O <sub>3</sub> Ru |
| <b>Formula weight</b>                                   | 559.65                                                           |
| <b>Temperature/K</b>                                    | 100                                                              |
| <b>Crystal system</b>                                   | triclinic                                                        |
| <b>Space group</b>                                      | P-1                                                              |
| <b>a/Å</b>                                              | 12.4670(4)                                                       |
| <b>b/Å</b>                                              | 14.7959(5)                                                       |
| <b>c/Å</b>                                              | 15.8824(5)                                                       |
| <b><math>\alpha</math>/°</b>                            | 70.962(2)                                                        |
| <b><math>\beta</math>/°</b>                             | 81.738(3)                                                        |
| <b><math>\gamma</math>/°</b>                            | 70.666(2)                                                        |
| <b>Volume/Å<sup>3</sup></b>                             | 2611.15(15)                                                      |
| <b>Z</b>                                                | 4                                                                |
| <b><math>\rho_{\text{calc}}</math>/g/cm<sup>3</sup></b> | 1.424                                                            |
| <b><math>\mu</math>/mm<sup>-1</sup></b>                 | 0.633                                                            |
| <b>F(000)</b>                                           | 1160.0                                                           |
| <b>Crystal size/mm<sup>3</sup></b>                      | 0.22 × 0.1 × 0.03                                                |
| <b>Radiation</b>                                        | Mo K $\alpha$ ( $\lambda$ = 0.71073)                             |
| <b>2<math>\theta</math> range for data collection/°</b> | 3.056 to 60.066                                                  |
| <b>Index ranges</b>                                     | -17 ≤ h ≤ 17, -20 ≤ k ≤ 20, -22 ≤ l ≤ 22                         |

|                                                                  |                                                                   |
|------------------------------------------------------------------|-------------------------------------------------------------------|
| <b>Reflections collected</b>                                     | 77228                                                             |
| <b>Independent reflections</b>                                   | 15110 [ $R_{\text{int}} = 0.0383$ , $R_{\text{sigma}} = 0.0673$ ] |
| <b>Data/restraints/parameters</b>                                | 15110/288/746                                                     |
| <b>Goodness-of-fit on <math>F^2</math></b>                       | 0.919                                                             |
| <b>Final R indexes [<math>I \geq 2\sigma(I)</math>]</b>          | $R_1 = 0.0397$ , $wR_2 = 0.0937$                                  |
| <b>Final R indexes [all data]</b>                                | $R_1 = 0.0830$ , $wR_2 = 0.1017$                                  |
| <b>Largest diff. peak/hole / <math>e \text{ \AA}^{-3}</math></b> | 1.55/-1.08                                                        |



3.1.7 [(3-Propyl-1-(1H- $\kappa$ N2-pyrazol-1-yl)-4-oxo-1,4-dihydronaphthalene-1,2-bis(olato)- $\kappa$ O1- $\kappa$ O2)( $\eta^6$ -*p*-cymene)osmium(II)]: **2a** (CCDC 2469757)

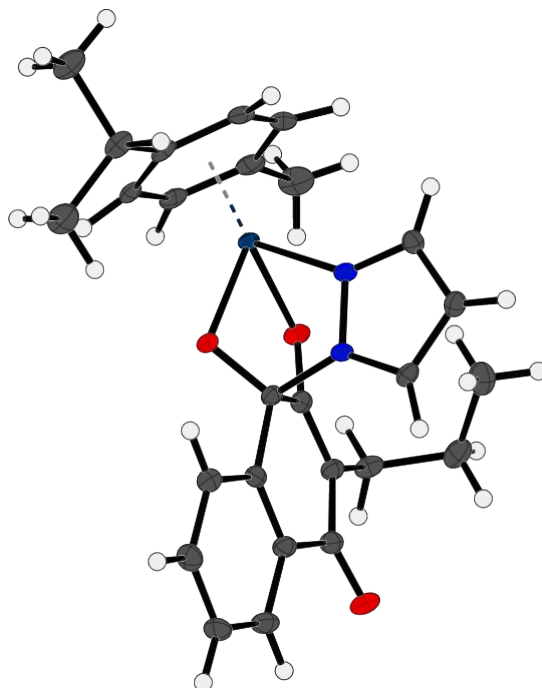

Figure S37: Crystal structure of complex **2a**.

A suitable crystal was selected and analyzed on a STOE STADIVARI diffractometer. The crystal was kept at 100 K during data collection. Using Olex2, the structure was solved with the SHELXT structure solution program using Intrinsic Phasing.

Table 7: Sample and crystal data of **2a**.

|                                         |                                                                  |
|-----------------------------------------|------------------------------------------------------------------|
| Empirical formula                       | C <sub>26</sub> H <sub>28</sub> N <sub>2</sub> O <sub>3</sub> Os |
| Formula weight                          | 606.70                                                           |
| Temperature/K                           | 100                                                              |
| Crystal system                          | triclinic                                                        |
| Space group                             | P-1                                                              |
| a/Å                                     | 10.174(2)                                                        |
| b/Å                                     | 10.412(2)                                                        |
| c/Å                                     | 12.597(3)                                                        |
| $\alpha$ /°                             | 102.88(3)                                                        |
| $\beta$ /°                              | 92.89(3)                                                         |
| $\gamma$ /°                             | 118.32(3)                                                        |
| Volume/Å <sup>3</sup>                   | 1126.1(5)                                                        |
| Z                                       | 2                                                                |
| $\rho_{\text{calc}}$ /g/cm <sup>3</sup> | 1.789                                                            |
| $\mu$ /mm <sup>-1</sup>                 | 10.943                                                           |
| F(000)                                  | 596.0                                                            |
| Crystal size/mm <sup>3</sup>            | 0.12 × 0.083 × 0.05                                              |

|                                               |                                                                   |
|-----------------------------------------------|-------------------------------------------------------------------|
| Radiation                                     | Cu K $\alpha$ ( $\lambda$ = 1.54178)                              |
| 2 $\theta$ range for data collection/°        | 7.32 to 142.956                                                   |
| Index ranges                                  | $-12 \leq h \leq 10$ , $-12 \leq k \leq 10$ , $-9 \leq l \leq 15$ |
| Reflections collected                         | 21447                                                             |
| Independent reflections                       | 4128 [ $R_{\text{int}}$ = 0.0122, $R_{\text{sigma}}$ = 0.0080]    |
| Data/restraints/parameters                    | 4128/0/293                                                        |
| Goodness-of-fit on $F^2$                      | 1.097                                                             |
| Final R indexes [ $I \geq 2\sigma(I)$ ]       | $R_1$ = 0.0167, $wR_2$ = 0.0412                                   |
| Final R indexes [all data]                    | $R_1$ = 0.0171, $wR_2$ = 0.0414                                   |
| Largest diff. peak/hole / e $\text{\AA}^{-3}$ | 0.44/-1.13                                                        |

3.1.8 [(3-Butyl-1-(1H- $\kappa$ N2-pyrazol-1-yl)-4-oxo-1,4-dihydronaphthalene-1,2-bis(olato)- $\kappa$ O1- $\kappa$ O2)( $\eta^6$ -*p*-cymene)osmium(II)]: **2b** (CCDC 2448268)

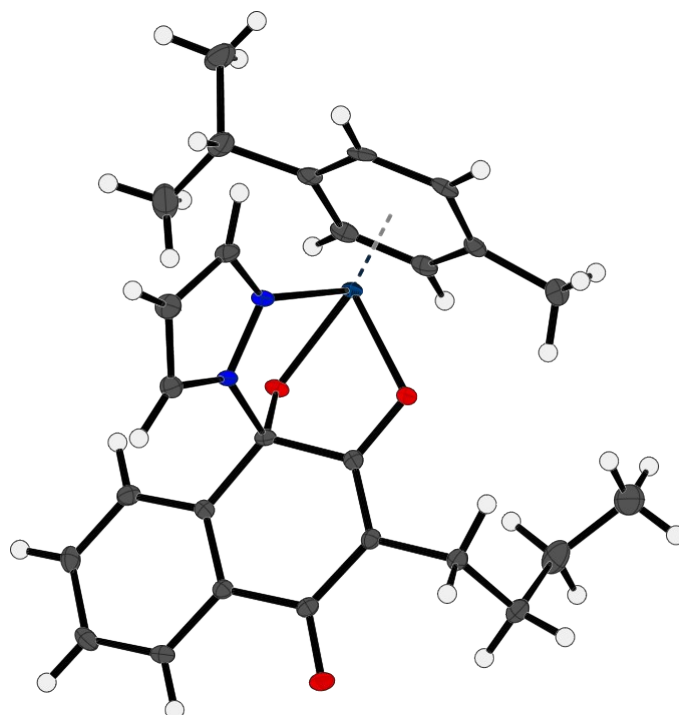

Figure S38: Crystal structure of complex **2b**.

A suitable crystal was selected and analyzed on a Bruker D8 Venture diffractometer. The crystal was kept at 100.00 K during data collection. Using Olex2, the structure was solved with the SHELXT structure solution program using Intrinsic Phasing.

Table S8: Sample and crystal data of **2b**.

|                       |                                                                  |
|-----------------------|------------------------------------------------------------------|
| Empirical formula     | C <sub>27</sub> H <sub>30</sub> N <sub>2</sub> O <sub>3</sub> Os |
| Formula weight        | 620.73                                                           |
| Temperature/K         | 100.00                                                           |
| Crystal system        | monoclinic                                                       |
| Space group           | P2 <sub>1</sub> /n                                               |
| <i>a</i> /Å           | 9.8350(4)                                                        |
| <i>b</i> /Å           | 17.5139(4)                                                       |
| <i>c</i> /Å           | 13.5380(3)                                                       |
| $\alpha$ /°           | 90                                                               |
| $\beta$ /°            | 94.237(2)                                                        |
| $\gamma$ /°           | 90                                                               |
| Volume/Å <sup>3</sup> | 2325.54(12)                                                      |

|                                                |                                                               |
|------------------------------------------------|---------------------------------------------------------------|
| Z                                              | 4                                                             |
| $\rho_{\text{calc}}/\text{g}/\text{cm}^3$      | 1.773                                                         |
| $\mu/\text{mm}^{-1}$                           | 5.515                                                         |
| F(000)                                         | 1224.0                                                        |
| Crystal size/ $\text{mm}^3$                    | $0.18 \times 0.1 \times 0.08$                                 |
| Radiation                                      | MoK $\alpha$ ( $\lambda = 0.71073$ )                          |
| 2 $\Theta$ range for data collection/ $^\circ$ | 3.81 to 52.744                                                |
| Index ranges                                   | $-12 \leq h \leq 12, -21 \leq k \leq 21, -16 \leq l \leq 16$  |
| Reflections collected                          | 101905                                                        |
| Independent reflections                        | 4745 [ $R_{\text{int}} = 0.0371, R_{\text{sigma}} = 0.0116$ ] |
| Data/restraints/parameters                     | 4745/0/302                                                    |
| Goodness-of-fit on $F^2$                       | 1.075                                                         |
| Final R indexes [ $I \geq 2\sigma(I)$ ]        | $R_1 = 0.0134, wR_2 = 0.0318$                                 |
| Final R indexes [all data]                     | $R_1 = 0.0152, wR_2 = 0.0323$                                 |
| Largest diff. peak/hole / $e \text{ \AA}^{-3}$ | 1.88/-0.89                                                    |

3.1.9 [(3-Isobutyl-1-(1H- $\kappa$ N2-pyrazol-1-yl)-4-oxo-1,4-dihydronaphthalene-1,2-bis(olato)- $\kappa$ O1- $\kappa$ O2)( $\eta^6$ -*p*-cymene)osmium(II)]: **2c** (CCDC 2422948)

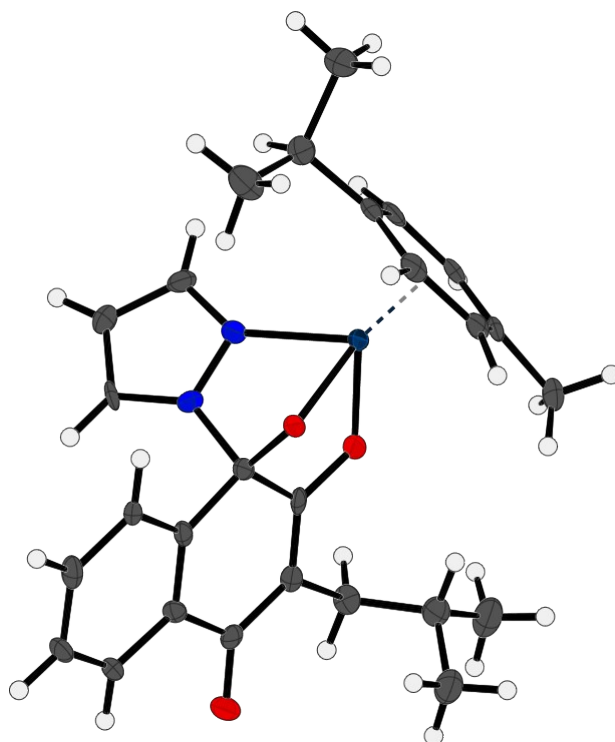

Figure S39: Crystal structure of complex **2c**.

A suitable crystal was selected and analyzed on a STOE STADIVARI diffractometer. The crystal was kept at 100 K during data collection. Using Olex2, the structure was solved with the SHELXT structure solution program using Intrinsic Phasing.

Table S9: Sample and crystal data of **2c**.

|                   |                                                                  |
|-------------------|------------------------------------------------------------------|
| Empirical formula | C <sub>27</sub> H <sub>30</sub> N <sub>2</sub> O <sub>3</sub> Os |
| Formula weight    | 620.73                                                           |
| Temperature/K     | 100                                                              |
| Crystal system    | monoclinic                                                       |
| Space group       | P2 <sub>1</sub> /n                                               |
| <i>a</i> /Å       | 10.1908(5)                                                       |
| <i>b</i> /Å       | 17.8342(8)                                                       |
| <i>c</i> /Å       | 12.9983(8)                                                       |
| $\alpha$ /°       | 90                                                               |

|                                                |                                                               |
|------------------------------------------------|---------------------------------------------------------------|
| $\beta/^\circ$                                 | 95.158(5)                                                     |
| $\gamma/^\circ$                                | 90                                                            |
| Volume/ $\text{\AA}^3$                         | 2352.8(2)                                                     |
| Z                                              | 4                                                             |
| $\rho_{\text{calc}}/\text{g/cm}^3$             | 1.752                                                         |
| $\mu/\text{mm}^{-1}$                           | 5.452                                                         |
| F(000)                                         | 1224.0                                                        |
| Crystal size/ $\text{mm}^3$                    | $0.13 \times 0.05 \times 0.04$                                |
| Radiation                                      | Mo K $\alpha$ ( $\lambda = 0.71073$ )                         |
| 2 $\theta$ range for data collection/ $^\circ$ | 3.888 to 51.35                                                |
| Index ranges                                   | $-11 \leq h \leq 12, -21 \leq k \leq 21, -15 \leq l \leq 15$  |
| Reflections collected                          | 27723                                                         |
| Independent reflections                        | 4286 [ $R_{\text{int}} = 0.0454, R_{\text{sigma}} = 0.0426$ ] |
| Data/restraints/parameters                     | 4286/0/304                                                    |
| Goodness-of-fit on $F^2$                       | 1.011                                                         |
| Final R indexes [ $I \geq 2\sigma(I)$ ]        | $R_1 = 0.0380, wR_2 = 0.0922$                                 |
| Final R indexes [all data]                     | $R_1 = 0.0551, wR_2 = 0.0982$                                 |
| Largest diff. peak/hole / $e \text{\AA}^{-3}$  | 1.75/-2.47                                                    |

3.1.10 [(3-(*tert*-butyl)-1-(1H- $\kappa$ N2-pyrazol-1-yl)-4-oxo-1,4-dihydronaphthalene-1,2-bis(olato)- $\kappa$ O1- $\kappa$ O2)( $\eta^6$ -*p*-cymene)osmium(II)]: **2d** (CCDC 2422949)

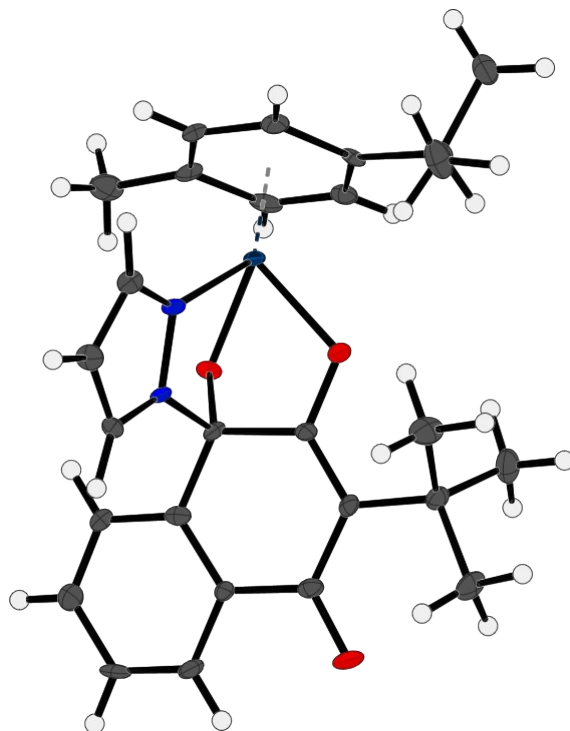

Figure S40: Crystal structure of complex **2d**.

A suitable crystal was selected and analyzed on a STOE STADIVARI diffractometer. The crystal was kept at 100 K during data collection. Using Olex2, the structure was solved with the SHELXT structure solution program using Intrinsic.

Table S10: Sample and crystal data of **2d**.

|                   |                                                                  |
|-------------------|------------------------------------------------------------------|
| Empirical formula | C <sub>27</sub> H <sub>30</sub> N <sub>2</sub> O <sub>3</sub> Os |
| Formula weight    | 620.73                                                           |
| Temperature/K     | 100                                                              |
| Crystal system    | triclinic                                                        |
| Space group       | P-1                                                              |
| <i>a</i> /Å       | 9.7513(4)                                                        |
| <i>b</i> /Å       | 9.8612(4)                                                        |
| <i>c</i> /Å       | 13.5758(6)                                                       |
| $\alpha$ /°       | 101.981(3)                                                       |
| $\beta$ /°        | 108.052(3)                                                       |
| $\gamma$ /°       | 96.820(3)                                                        |

|                                             |                                                                |
|---------------------------------------------|----------------------------------------------------------------|
| Volume/Å <sup>3</sup>                       | 1190.39(9)                                                     |
| Z                                           | 2                                                              |
| $\rho_{\text{calc}}/\text{g}/\text{cm}^3$   | 1.732                                                          |
| $\mu/\text{mm}^{-1}$                        | 5.387                                                          |
| F(000)                                      | 612.0                                                          |
| Crystal size/mm <sup>3</sup>                | 0.125 × 0.065 × 0.02                                           |
| Radiation                                   | Mo K $\alpha$ ( $\lambda$ = 0.71073)                           |
| 2 $\Theta$ range for data collection/°      | 6.288 to 51.364                                                |
| Index ranges                                | -11 ≤ h ≤ 6, -11 ≤ k ≤ 11, -16 ≤ l ≤ 16                        |
| Reflections collected                       | 18197                                                          |
| Independent reflections                     | 4318 [ $R_{\text{int}}$ = 0.0494, $R_{\text{sigma}}$ = 0.0585] |
| Data/restraints/parameters                  | 4318/0/304                                                     |
| Goodness-of-fit on $F^2$                    | 0.997                                                          |
| Final R indexes [ $I \geq 2\sigma(I)$ ]     | $R_1$ = 0.0340, $wR_2$ = 0.0772                                |
| Final R indexes [all data]                  | $R_1$ = 0.0449, $wR_2$ = 0.0796                                |
| Largest diff. peak/hole / e Å <sup>-3</sup> | 2.38/-1.49                                                     |



3.1.11 [(3-Neopentyl-1-(1H- $\kappa$ N2-pyrazol-1-yl)-4-oxo-1,4-dihydronaphthalene-1,2-bis(olato)- $\kappa$ O1- $\kappa$ O2)( $\eta^6$ -p-cymene)osmium(II)]: **2e** (CCDC 2422947)

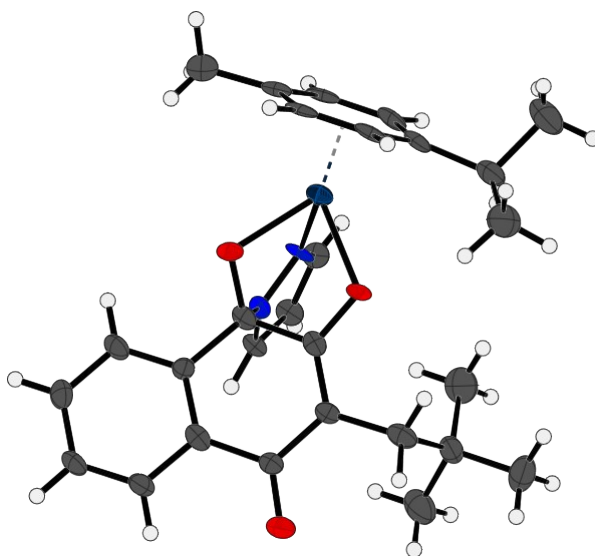

Figure S41: Crystal structure of complex **2e**.

A suitable crystal was selected and analyzed on a STOE STADIVARI diffractometer. The crystal was kept at 100 K during data collection. Using Olex2, the structure was solved with the SHELXT structure solution program using Intrinsic Phasing.

Table S11: Sample and crystal data of **2e**.

|                       |                                                                  |
|-----------------------|------------------------------------------------------------------|
| Empirical formula     | C <sub>32</sub> H <sub>42</sub> N <sub>2</sub> O <sub>4</sub> Os |
| Formula weight        | 708.87                                                           |
| Temperature/K         | 100                                                              |
| Crystal system        | triclinic                                                        |
| Space group           | P-1                                                              |
| <i>a</i> /Å           | 9.7072(6)                                                        |
| <i>b</i> /Å           | 12.7353(8)                                                       |
| <i>c</i> /Å           | 14.3871(8)                                                       |
| $\alpha$ /°           | 102.980(5)                                                       |
| $\beta$ /°            | 102.104(5)                                                       |
| $\gamma$ /°           | 111.815(5)                                                       |
| Volume/Å <sup>3</sup> | 1522.21(17)                                                      |
| <i>Z</i>              | 2                                                                |

|                                                       |                                                               |
|-------------------------------------------------------|---------------------------------------------------------------|
| $\rho_{\text{calc}}/\text{g}/\text{cm}^3$             | 1.547                                                         |
| $\mu/\text{mm}^{-1}$                                  | 4.226                                                         |
| F(000)                                                | 712.0                                                         |
| Crystal size/ $\text{mm}^3$                           | $0.063 \times 0.059 \times 0.01$                              |
| Radiation                                             | Mo K $\alpha$ ( $\lambda = 0.71073$ )                         |
| 2 $\theta$ range for data collection/ $^\circ$        | 4.77 to 52.944                                                |
| Index ranges                                          | $-12 \leq h \leq 11, -15 \leq k \leq 14, -17 \leq l \leq 17$  |
| Reflections collected                                 | 26452                                                         |
| Independent reflections                               | 5807 [ $R_{\text{int}} = 0.0713, R_{\text{sigma}} = 0.1661$ ] |
| Data/restraints/parameters                            | 5807/54/360                                                   |
| Goodness-of-fit on $F^2$                              | 0.873                                                         |
| Final R indexes [ $I \geq 2\sigma(I)$ ]               | $R_1 = 0.0384, wR_2 = 0.0623$                                 |
| Final R indexes [all data]                            | $R_1 = 0.0881, wR_2 = 0.0706$                                 |
| Largest diff. peak/hole / $\text{e } \text{\AA}^{-3}$ | 1.81/-2.15                                                    |

$\kappa O1-\kappa O2)(\eta^6-p\text{-cymene})\text{osmium(II)}]: \mathbf{2f}$  (CCDC 2469755)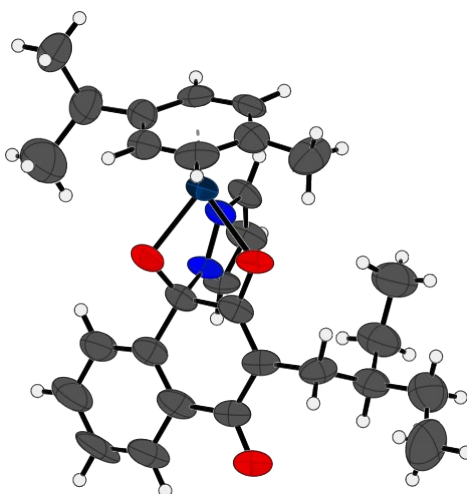

Figure S42: Crystal structure of complex **2f**.

A suitable crystal was selected and measured on a Bruker APEX-II CCD diffractometer. The crystal was kept at 200.15 K during data collection. Using Olex2, the structure was solved with the SHELXT structure solution program using Intrinsic Phasing.

Table 12: Sample and crystal data of **2f**.

|                             |                                                                  |
|-----------------------------|------------------------------------------------------------------|
| <b>Empirical formula</b>    | C <sub>29</sub> H <sub>34</sub> N <sub>2</sub> O <sub>3</sub> Os |
| <b>Formula weight</b>       | 648.78                                                           |
| <b>Temperature/K</b>        | 200.15                                                           |
| <b>Crystal system</b>       | triclinic                                                        |
| <b>Space group</b>          | P-1                                                              |
| <b>a/Å</b>                  | 12.4011(16)                                                      |
| <b>b/Å</b>                  | 15.266(2)                                                        |
| <b>c/Å</b>                  | 16.009(2)                                                        |
| <b>α/°</b>                  | 70.693(4)                                                        |
| <b>β/°</b>                  | 81.979(4)                                                        |
| <b>γ/°</b>                  | 69.726(4)                                                        |
| <b>Volume/Å<sup>3</sup></b> | 2682.0(6)                                                        |

|                                                                           |                                                               |
|---------------------------------------------------------------------------|---------------------------------------------------------------|
| <b>Z</b>                                                                  | 4                                                             |
| <b><math>\rho_{\text{calc}}/\text{g/cm}^3</math></b>                      | 1.607                                                         |
| <b><math>\mu/\text{mm}^{-1}</math></b>                                    | 4.786                                                         |
| <b>F(000)</b>                                                             | 1288.0                                                        |
| <b>Crystal size/<math>\text{mm}^3</math></b>                              | $0.5 \times 0.125 \times 0.1$                                 |
| <b>Radiation</b>                                                          | MoK $\alpha$ ( $\lambda = 0.71073$ )                          |
| <b>2<math>\theta</math> range for data collection/<math>^\circ</math></b> | 3.802 to 50.684                                               |
| <b>Index ranges</b>                                                       | $-14 \leq h \leq 14, -16 \leq k \leq 18, 19 \leq l \leq 0$    |
| <b>Reflections collected</b>                                              | 9392                                                          |
| <b>Independent reflections</b>                                            | 9392 [ $R_{\text{int}} = 0.0922, R_{\text{sigma}} = 0.0788$ ] |
| <b>Data/restraints/parameters</b>                                         | 9392/344/714                                                  |
| <b>Goodness-of-fit on <math>F^2</math></b>                                | 1.057                                                         |
| <b>Final R indexes [<math> I  \geq 2\sigma(I)</math>]</b>                 | $R_1 = 0.0462, wR_2 = 0.0855$                                 |
| <b>Final R indexes [all data]</b>                                         | $R_1 = 0.0964, wR_2 = 0.0954$                                 |
| <b>Largest diff. peak/hole / <math>e \text{ \AA}^{-3}</math></b>          | 1.08/-0.94                                                    |

## 4 HPLC-MS

Compounds **1a–f**, **2a–f** were dissolved in DMSO (10  $\mu$ M) and resulting stock solutions were diluted to final concentrations of 20  $\mu$ M in phosphate buffered saline (pH 7.4) with 1% DMSO. Samples were stored at 20 °C and analyzed *via* UHPLC at time points 0, 1, 2, 3, 4, 5, 24 and 48 hours (5–95% acetonitrile in MQ water, consistent flow rates at 0.6 mL/min, acid free conditions, C18 column).

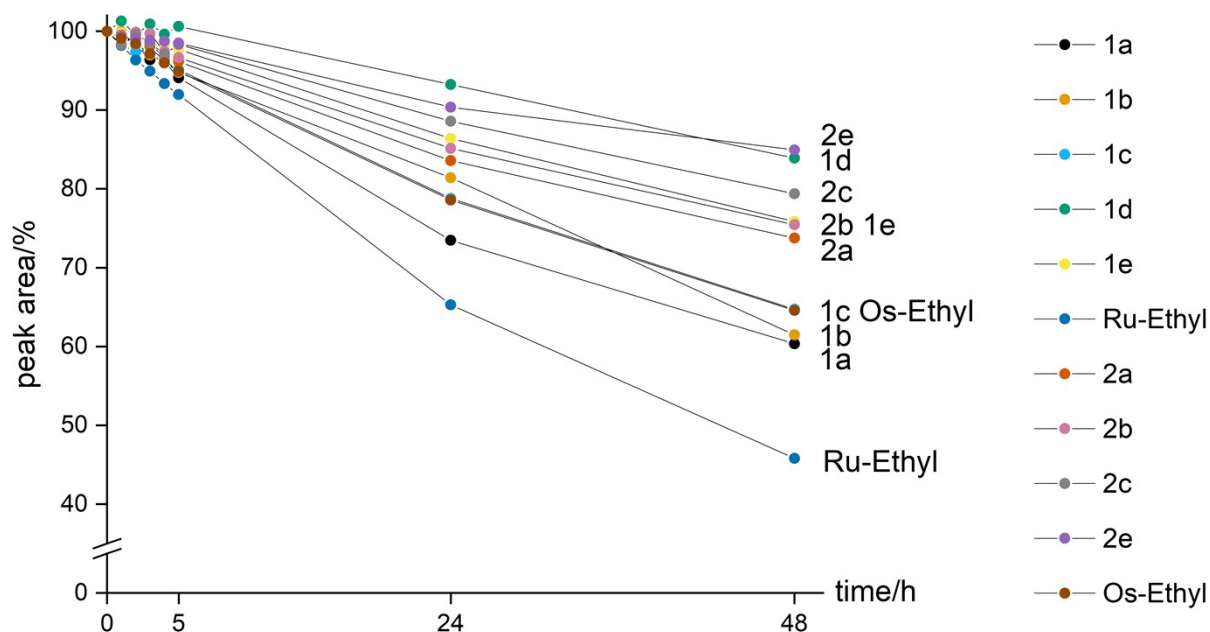

Figure S43: Stability in aqueous solution (PBS/1% DMSO) over 48 hours (A/A<sub>0</sub>=area at given timepoint/area at timepoint 0).

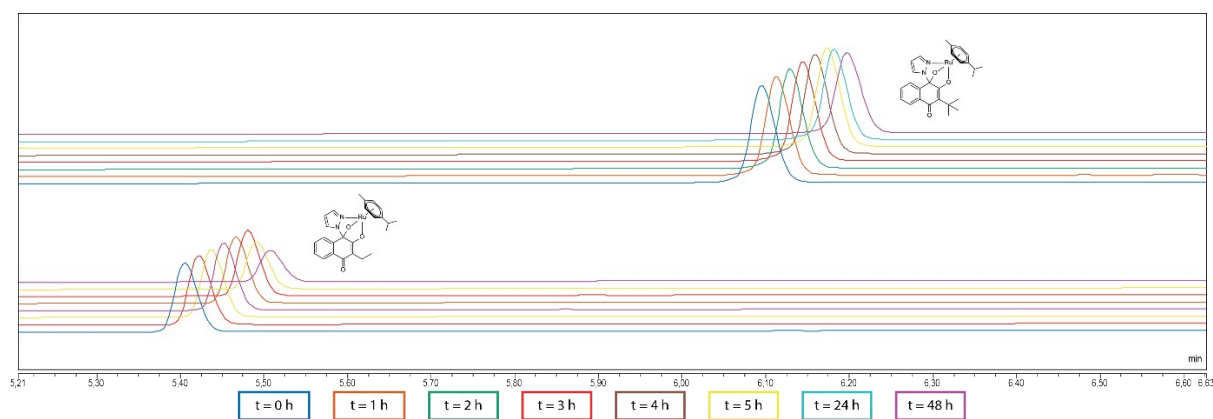

Figure S44: Chromatograms of Ru-Ethyl and **1d** over time.

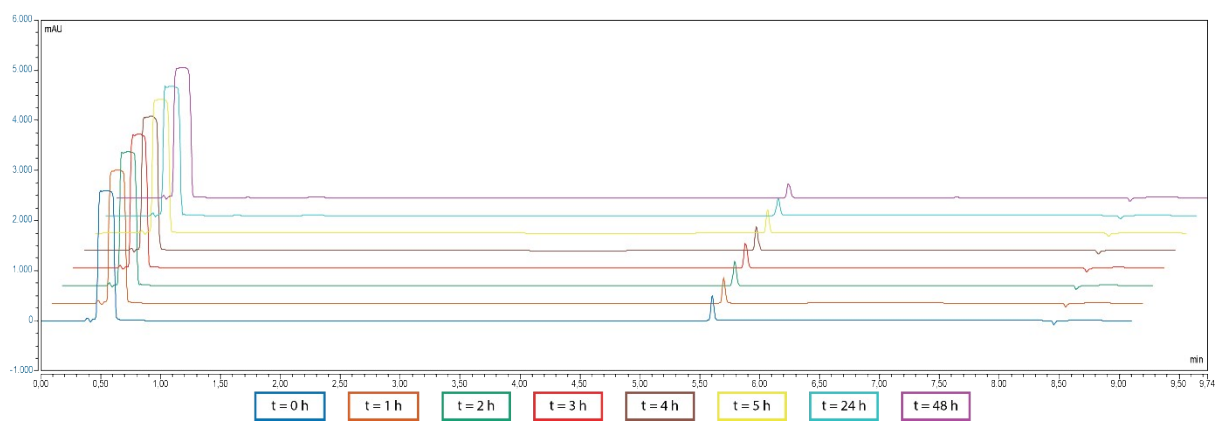

Figure S45: Chromatograms of complex **1a** over time.

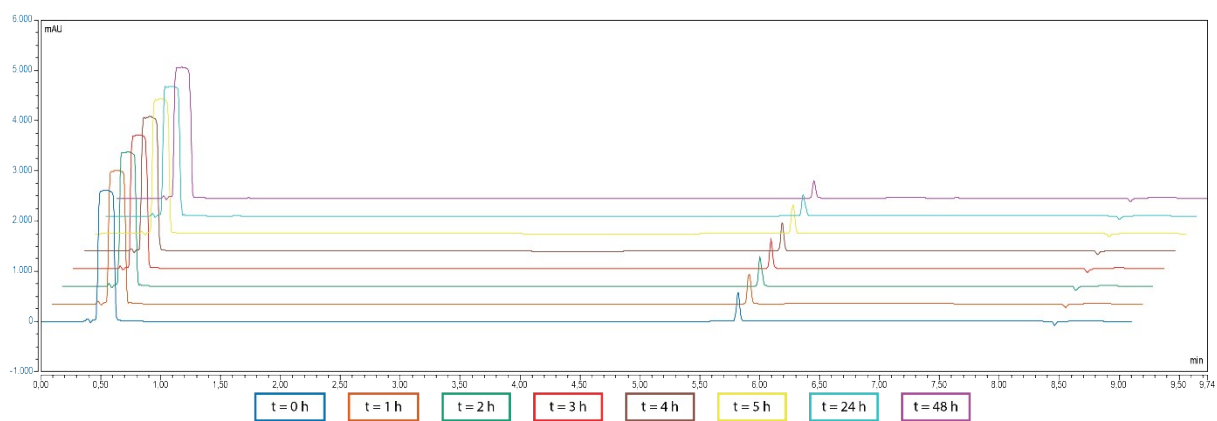

Figure S46: Chromatograms of complex **1b** over time.

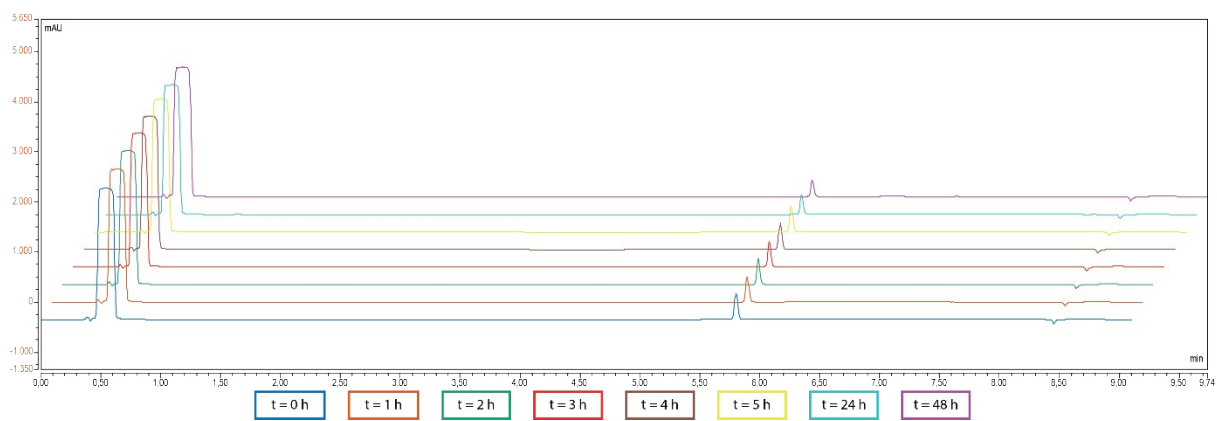

Figure S47: Chromatograms of complex **1c** over time.

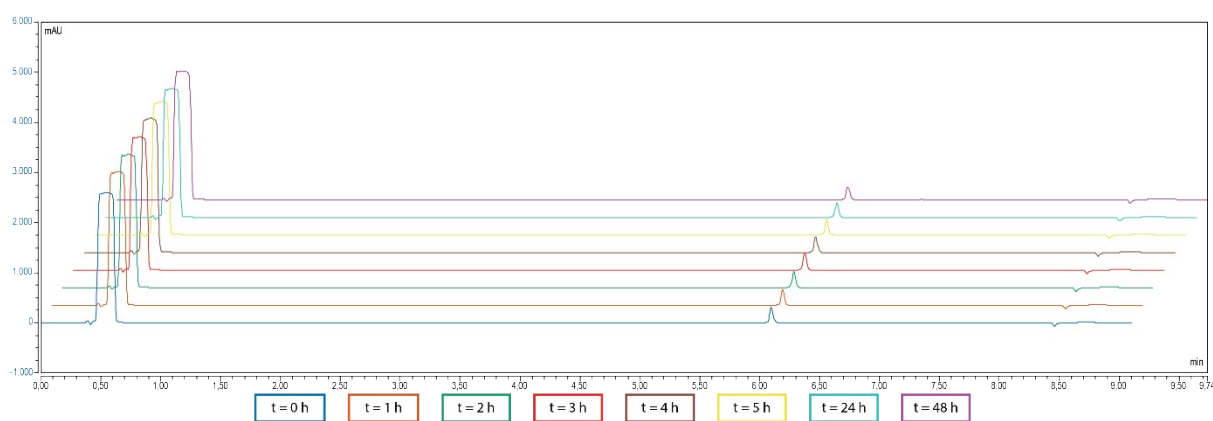

Figure S48: Chromatograms of complex **1d** over time.

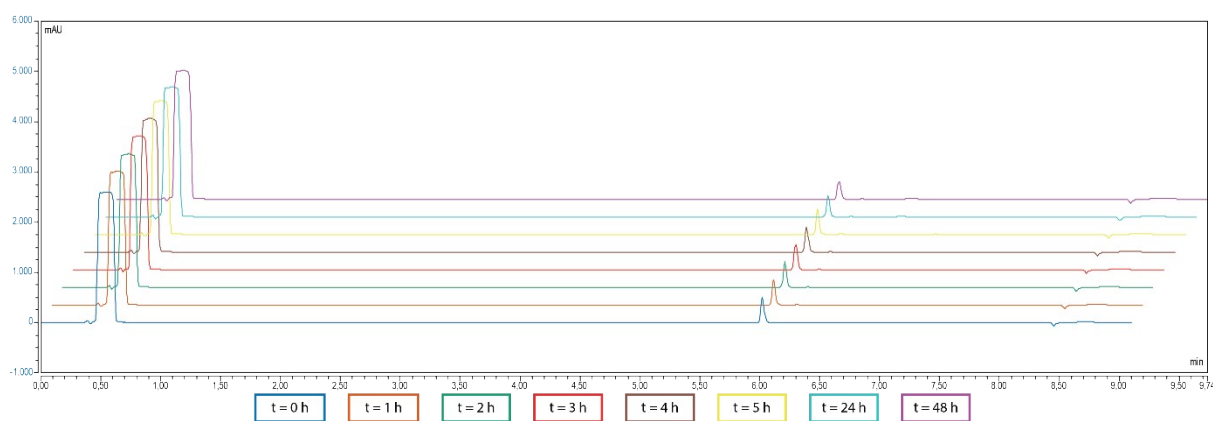

Figure S49: Chromatograms of complex **1e** over time.

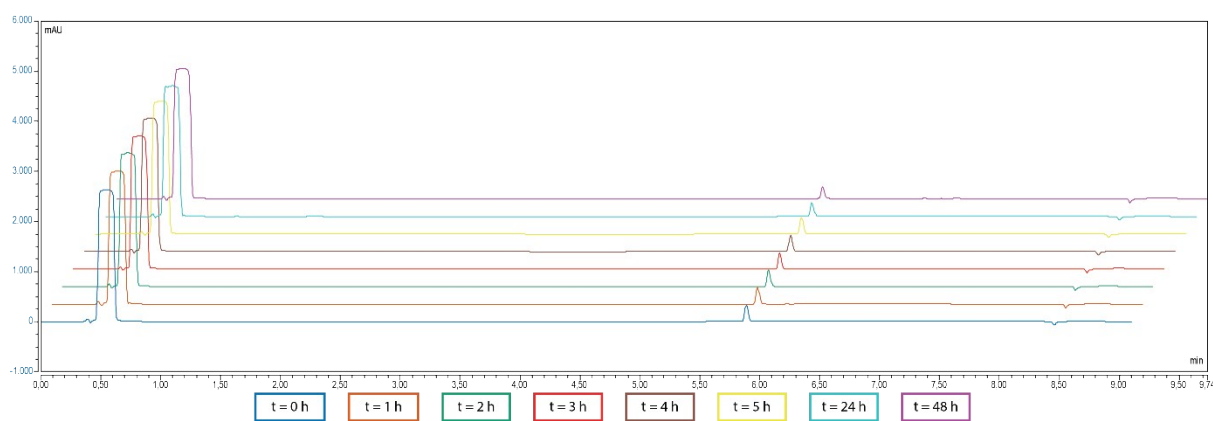

Figure S50: Chromatograms of complex **2a** over time.

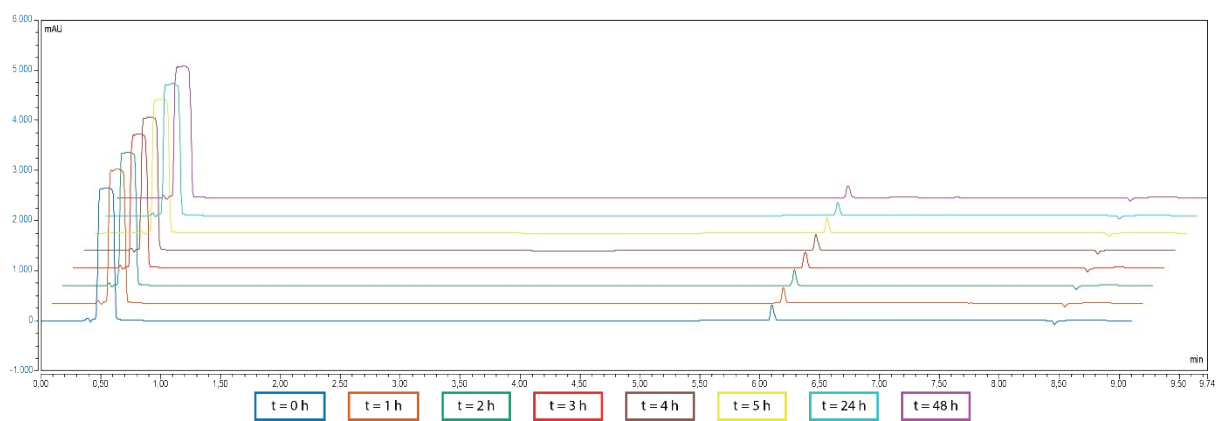

Figure S51: Chromatograms of complex **2b** over time.

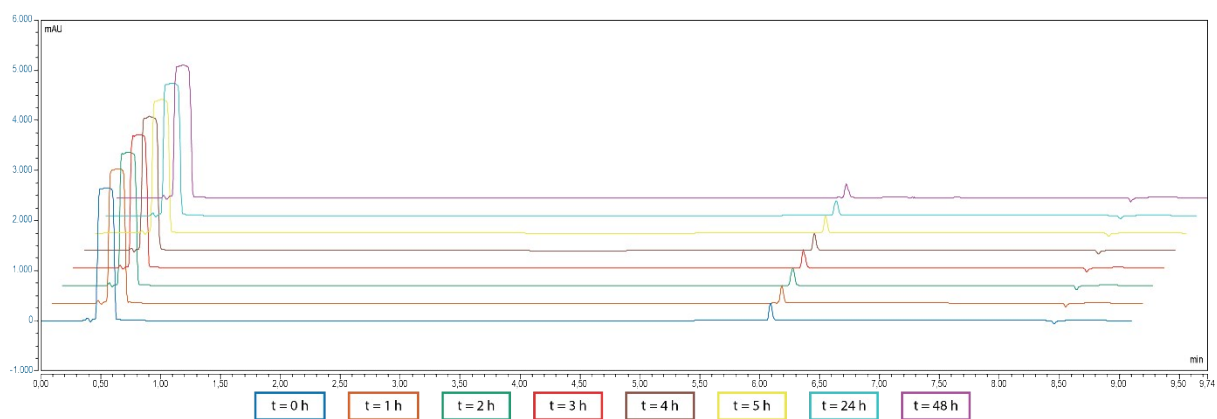

Figure S52: Chromatograms of complex **2c** over time.

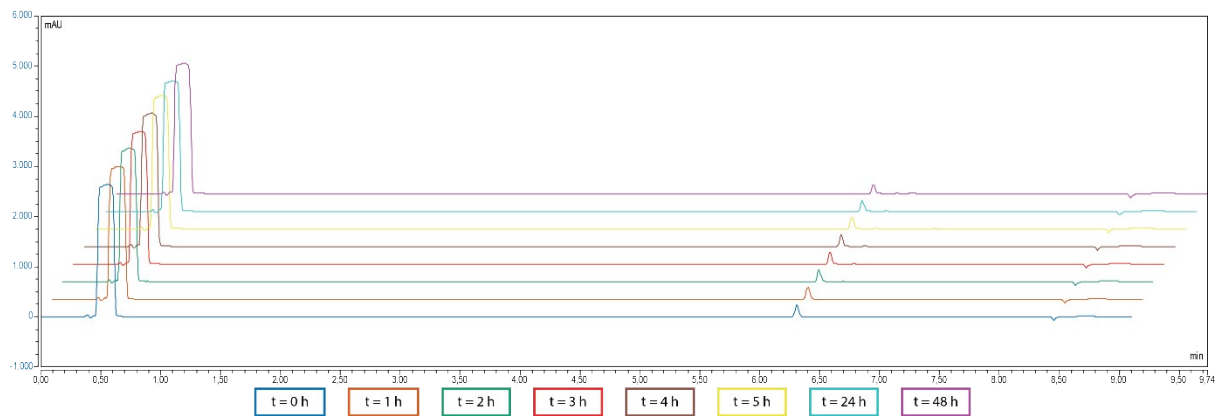

Figure S53: Chromatograms of complex **2e** over time.



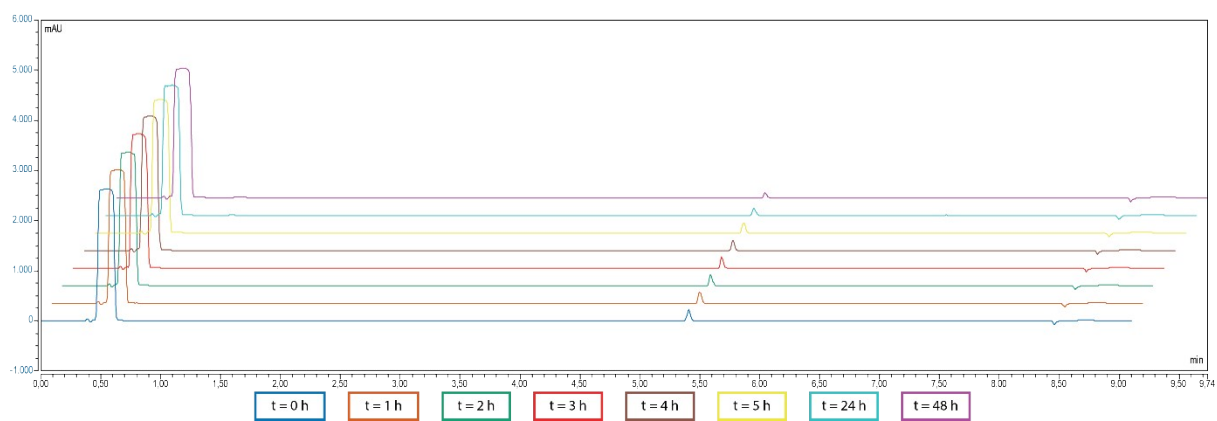

Figure S54: Chromatograms of Ru-Ethyl over time.

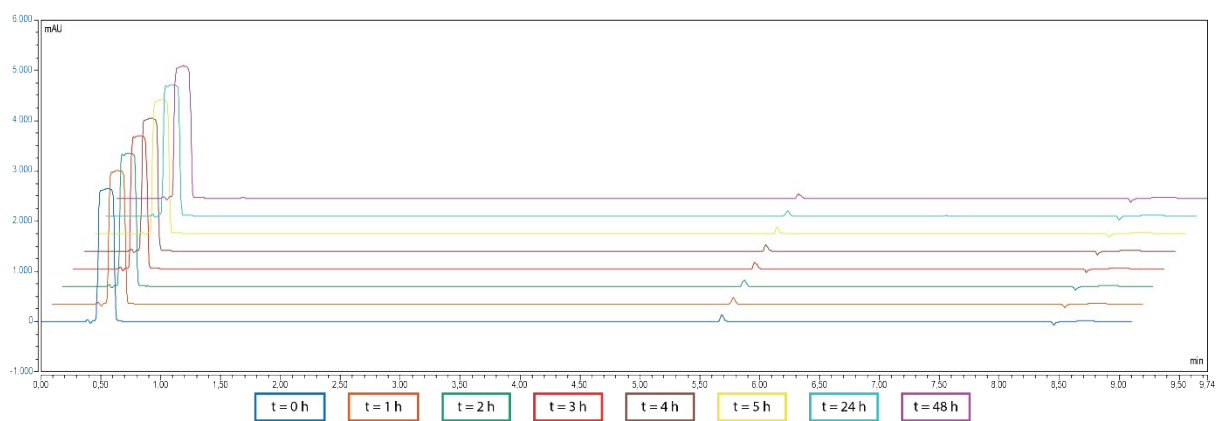

Figure S55: Chromatograms of Os-Ethyl over time.

## 5 Cell Culture

All cell lines were cultivated at 37°C, 5% CO<sub>2</sub>, humidified atmosphere in 75 cm<sup>2</sup> culture flasks as monolayer cultures. The growth culture medium was Minimal Essential Medium (MEM) supplemented with 10% fetal bovine serum (FBS, Biowest), 1 mM sodium pyruvate solution, 1% non-essential amino acids solution (from 100× stock) and 4 mM L-glutamine. RPMI-1640 used in cell viability assay was supplemented with 10% FBS and 4 mM L-glutamine. All reagents were purchased from Sigma-Aldrich (Merck).

### 5.1 Cell Viability Assay (MTT Assay)

The cytotoxicity of KP2912 was determined on adherently-grown cell cultures via MTT assay (3-[4,5-dimethylthiazol-2-yl]-2,5-diphenyltetrazolium bromide). For this purpose, the cancer cells were seeded in 96-well plates (CytoOne) in cell densities of 3×10<sup>3</sup> cells/well for A549 (non-small cell lung carcinoma), 2×10<sup>3</sup> cells/well for SW480 (colon carcinoma) and 1×10<sup>3</sup> cells/well for PA-1/CH-1 (ovarian teratocarcinoma) to ensure exponential growth during the entire experiment. Cells were allowed to recover and settle for 24 h prior to drug exposure. The complex was dissolved in DMSO/MEM in a way that the DMSO concentration on the cells did not exceed 0.5%. The compound dilutions were added to the cells in three technical replicates (100 µL/well), negative control wells were supplemented with complete media (100 µL/well). The plates were incubated for 96 h at 37°C, 5% CO<sub>2</sub>, moist atmosphere. After incubation, the drug-containing medium was replaced with 100 µL of a 1:6 MTT-RPMI mixture (MTT solution: 5 mg/mL MTT in PBS) and incubated for 4 h. The yellow MTT-containing supernatant was removed and formazan-crystals formed in viable cells were dissolved in 150 µL of DMSO. After 15 min, the optical densities were measured with a microplate reader (ELx808, Biotek) at a wavelength of 550 nm and a reference wavelength of 690 nm. The IC<sub>50</sub> values were interpolated from concentration-effect curves. The calculations are based on at least three independently performed experiments, each with triplicates per concentration level.

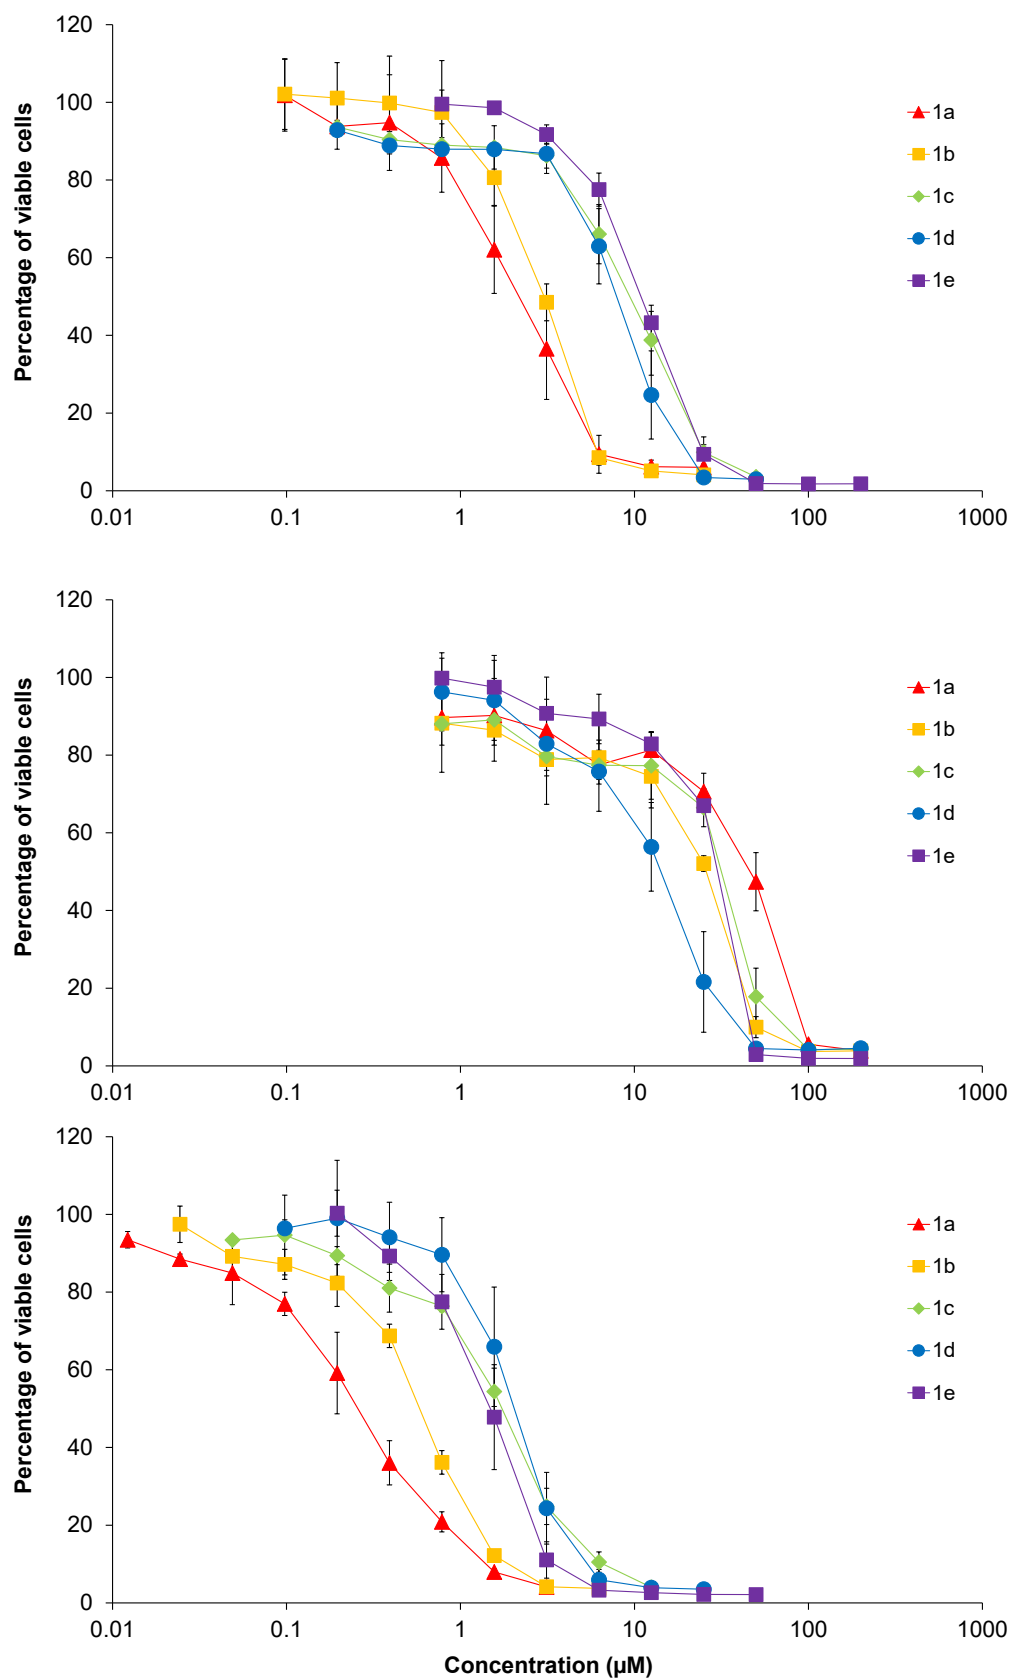

Figure S56: Concentration-effect curves of 1a–1e in A549 (top), CH1/PA-1 (center) and SW480 cells (bottom) relative to untreated controls (100%). Values are means  $\pm$  standard deviations from at least three independent 96 h MTT assays.

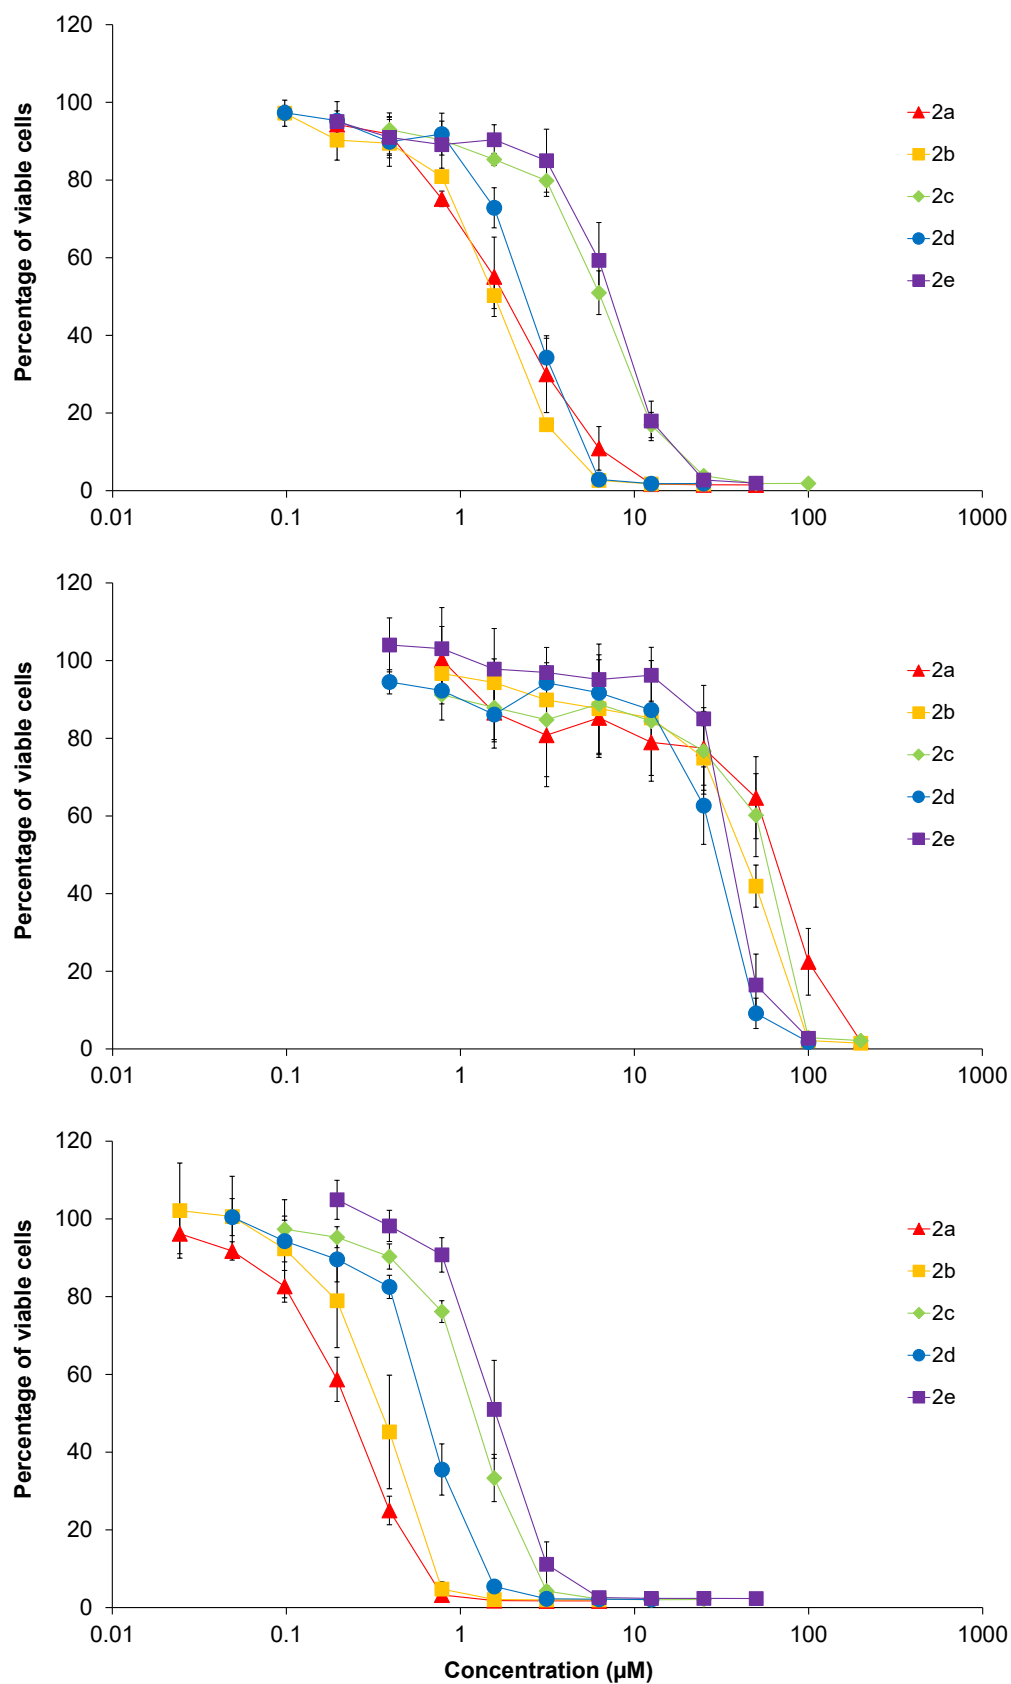

Figure S57: Concentration-effect curves of **2a**–**2e** in A549 (top), CH1/PA-1 (center) and SW480 cells (bottom) relative to untreated controls (100%). Values are means  $\pm$  standard deviations from at least three independent 96 h MTT assays.

## 5.2 Cellular accumulation

Table S13: Accumulation in SW480 cells. It was examined for ruthenium derivatives 1a–1e and Ru-Ethyl. Solvent: 0.5% DMSO.

| Compound        | Substituent                    | Concentration<br>$\mu\text{M}$ | Average<br>fg Ru/cell | Standard<br>deviation<br>fg Ru/cell | RSD/% |
|-----------------|--------------------------------|--------------------------------|-----------------------|-------------------------------------|-------|
| <b>Ru-Ethyl</b> | C <sub>2</sub> H <sub>5</sub>  | 50                             | 545.9                 | 15.0                                | 3     |
| <b>1a</b>       | C <sub>3</sub> H <sub>7</sub>  | 50                             | 362.4                 | 68.3                                | 19    |
| <b>1b</b>       | C <sub>4</sub> H <sub>9</sub>  | 50                             | 242.6                 | 58.6                                | 24    |
| <b>1c</b>       | C <sub>4</sub> H <sub>9</sub>  | 50                             | 109.8                 | 4.6                                 | 4     |
| <b>1d</b>       | C <sub>4</sub> H <sub>9</sub>  | 50                             | 78.2                  | 20.9                                | 27    |
| <b>1e</b>       | C <sub>5</sub> H <sub>11</sub> | 50                             | 72.9                  | 6.1                                 | 8     |

## 5.3 Cell Cycle Studies

For cell cycle studies the colon carcinoma cells (SW480) and ovarian teratocarcinoma cells (PA-1/CH-1) were seeded in 12-well plates (CytoOne) in densities of  $1 \times 10^5$  cells per well (in 1 mL MEM). After the recovery time of 24 h, cells were treated with different concentrations of the organoruthenium and organoosmium test compounds Ru-Ethyl, Os-Ethyl, **1a**, **1c**, **2a**, **2c**. For this purpose, the test substances were dissolved in DMSO/MEM in a way that the maximum concentration of DMSO on the cells did not exceed 0.5%. Etoposide (causes G2/S phase arrest) and gemcitabine (causes G1/S arrest) were applied as positive controls. Plates were incubated at 37°C, 5% CO<sub>2</sub>, moist atmosphere for 24 h. Following the exposure, cells were collected via trypsinisation, washed with complete MEM and PBS and stained with DNA-intercalating dye propidium iodide (PI) diluted in hypotonic fluorochrome solution (HFS: 0.1% (V/V) Triton X-100; 0.1% (W/V) sodium citrate in H<sub>2</sub>O, PI/HFS mixture: 40  $\mu\text{g/mL}$ , 500  $\mu\text{L}$  per probe). The PI solution was added to the HFS shortly before use and the cells were stained in the dark at 4 °C overnight. The fluorescence of all samples was measured no longer than 24 h after staining procedure by means of flow cytometry (Guava easyCyte 8HT, Millipore).

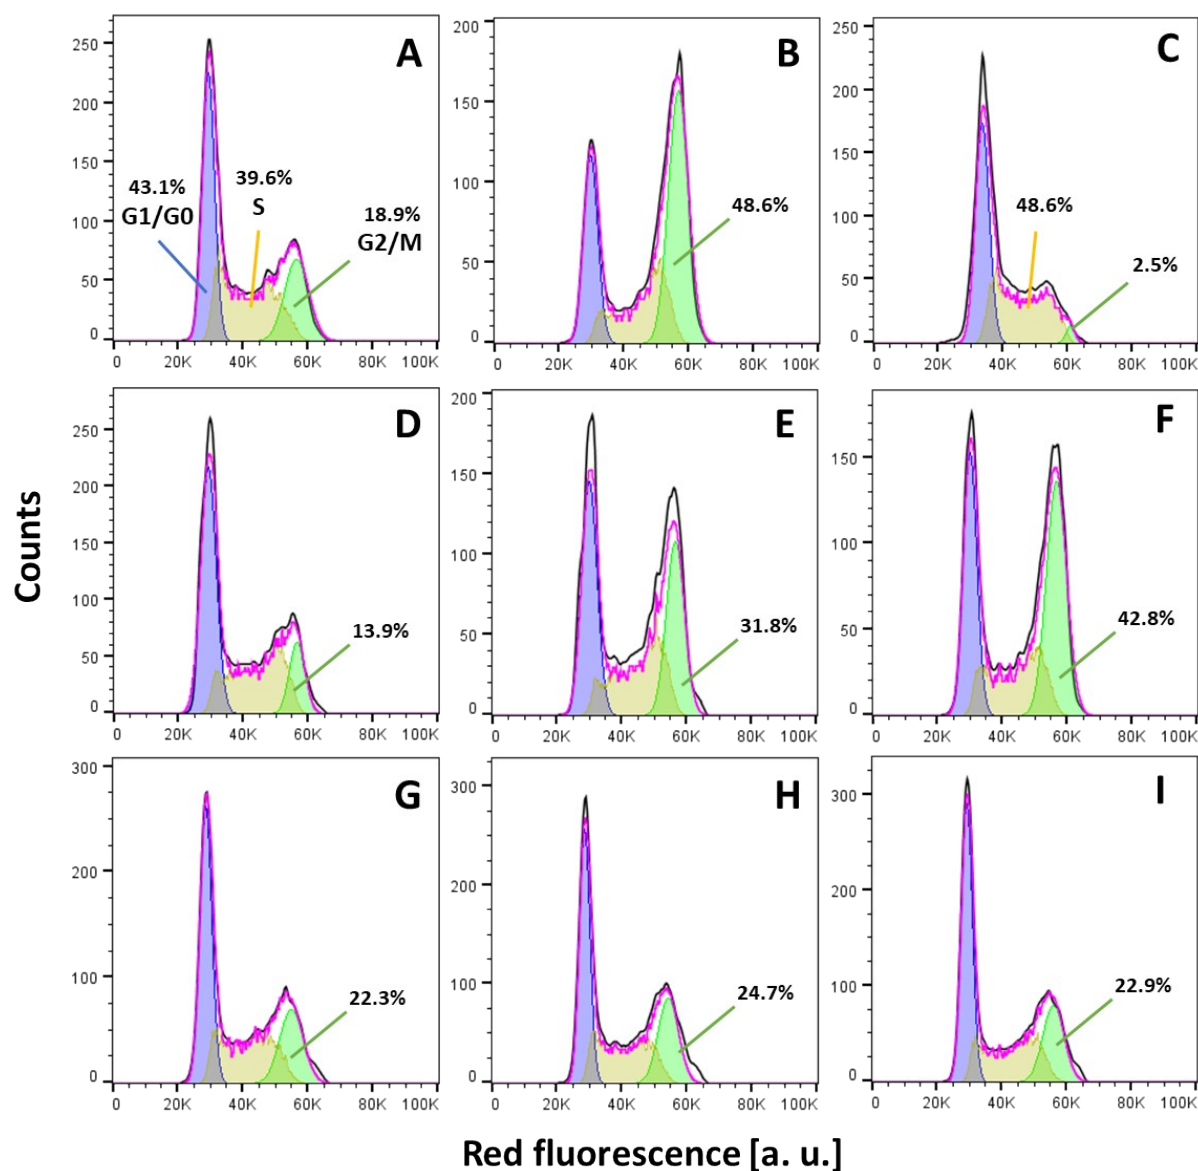

Figure S58: Histograms of cell cycle phase distribution in PA-1 ovarian cancer cells. Negative control (A), etoposide – G2/M phase inhibitor (B), gemcitabine – S phase inhibitor (C), raising concentrations of Ru-Ethyl (D-F, 0.05  $\mu$ M, 25  $\mu$ M, 50  $\mu$ M), raising concentrations of Os-Ethyl (G-I, 0.05  $\mu$ M, 25  $\mu$ M, 50  $\mu$ M).

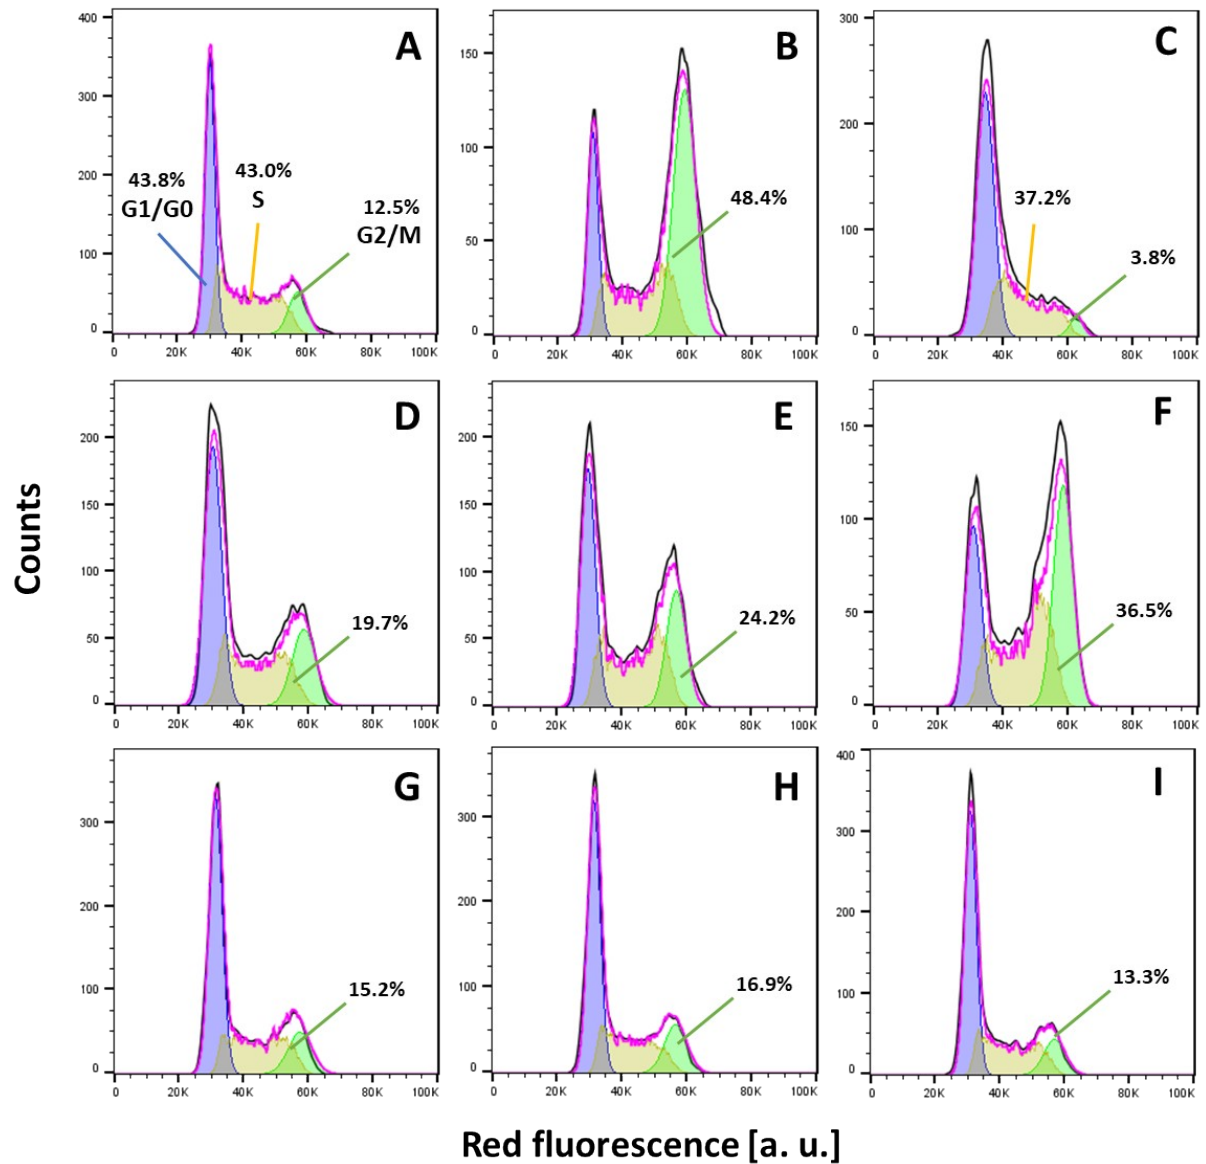

Figure S59: Histograms of cell cycle phase distribution in SW480 colon cancer cells. Negative control (A), etoposide – G2/M phase inhibitor (B), gemcitabine – S phase inhibitor (C), raising concentrations of Ru-Ethyl (D-F, 0.0125  $\mu$ M, 0.025  $\mu$ M, 0.05  $\mu$ M), raising concentrations of Os-Ethyl (G-I, 0.0125  $\mu$ M, 0.025  $\mu$ M, 0.05  $\mu$ M).

#### 5.4 Colorimetric Kyn Assay.

SKOV3 cells were seeded at 4000 cells/well in 96-well plates and allowed to recover for 24 h. Cells were treated for 72 h. For the post-washout experiments, supernatants (150  $\mu$ L/well) and blank medium were transferred to microcentrifuge tubes. Confluency was measured by Incucyte S3. To precipitate proteins, the supernatants were mixed with 75  $\mu$ L 30% (w/v) trichloroacetic acid. N-Formyl-Kyn was hydrolyzed to Kyn by incubating the supernatants for 30 min in a thermoblock at 50 °C and 300 rpm. The supernatants were cleared by centrifugation (10 min at 10,000g), and 100  $\mu$ L of the clear supernatants was transferred to a fresh 96-well plate in duplicates and incubated with 100  $\mu$ L Ehrlich's reagent [2% 4-(dimethylamino)-benzaldehyde in acetic acid] for 10 min at r.t.. The absorption of Kyn was measured at 490 nm (reference 620 nm), and the absorbance of blank medium was subtracted. The Kyn concentrations were calculated using a standard curve [generated from L-Kyn dilution series in blank medium] and normalized to confluency.

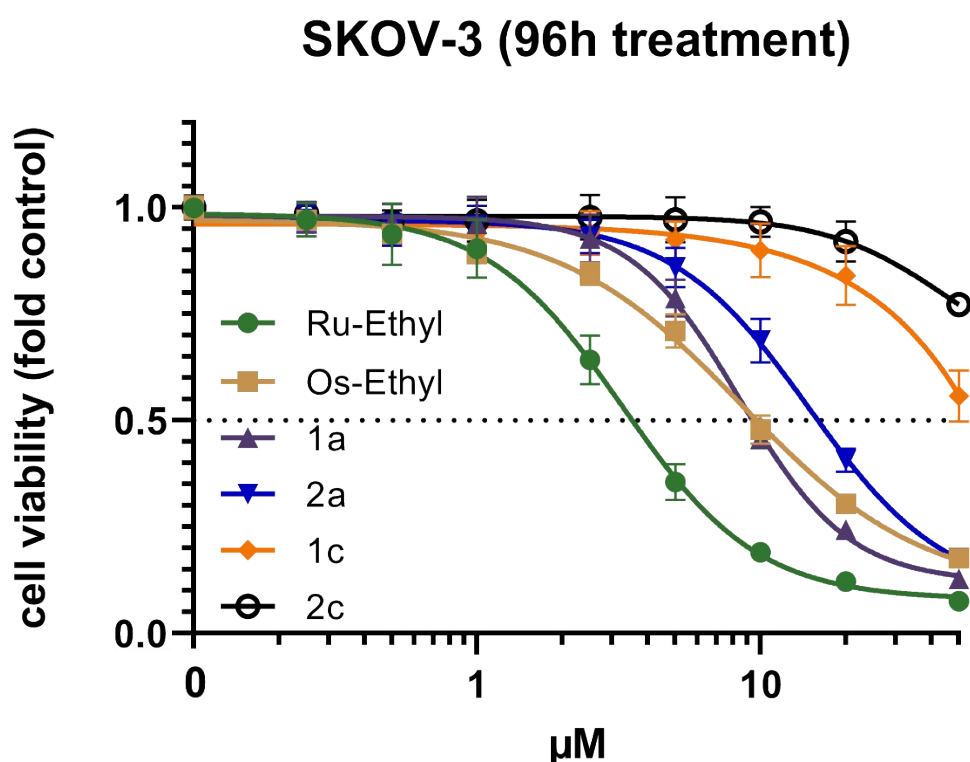

Figure S60: Concentration-effect curves of Ru-Ethyl, Os-Ethyl, **1a**, **2a**, **1c**, **2c** in SKOV3 relative to untreated controls (100%). Values are means  $\pm$  standard deviations from at least three independent MTT assays.



## 6 Appendix

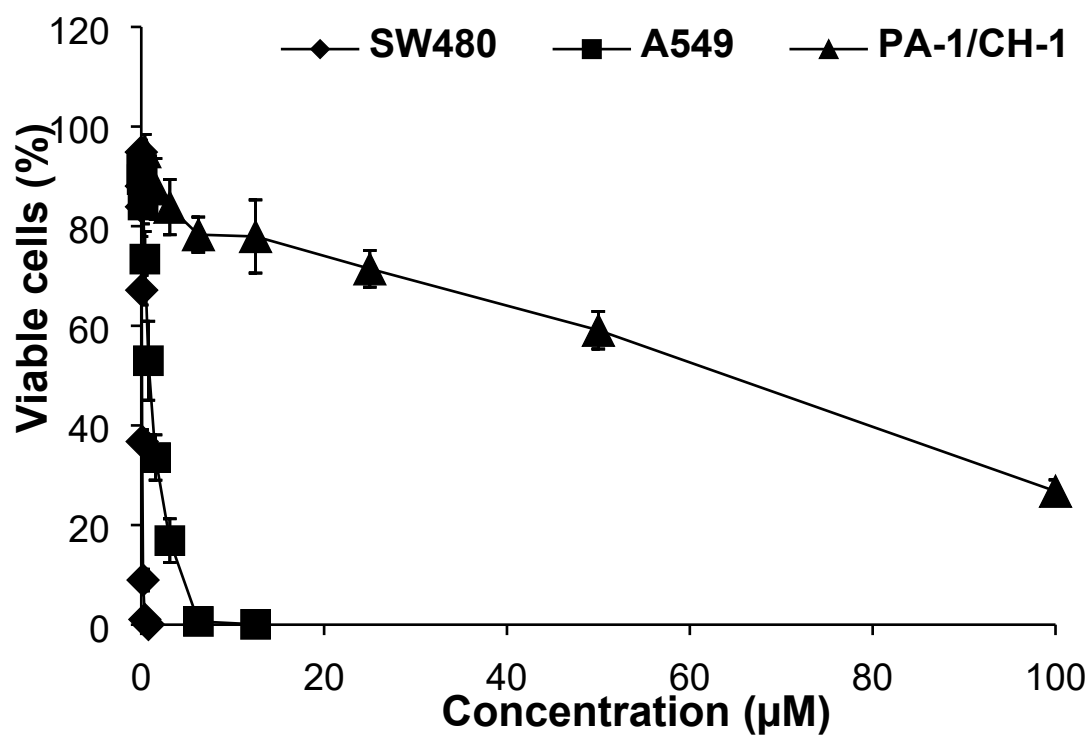

Figure S61: Concentration-effect curves of Os-Ethyl upon treatment of three human cancer cell lines (curves left to right: SW480, A549, CH1/PA-1).

Table S14: Cell cycle phase distribution in CH1/PA-1 cells upon treatment with test-compounds. Values are presented as means  $\pm$  standard deviations calculated from at least 3 independent experiments. Ru-Ethyl, **1a**, **1c**, Os-Ethyl, **2a** and **2c** were analyzed.

## Ruthenium

| Compound         | Concentration, $\mu$ M | Cell cycle phase distribution, % |             |             |
|------------------|------------------------|----------------------------------|-------------|-------------|
|                  |                        | G1/G0                            | S           | G2/M        |
| Negative control |                        | 37 $\pm$ 3                       | 42 $\pm$ 5  | 22 $\pm$ 4  |
| Etoposide        | 0.1                    | 21 $\pm$ 4                       | 36 $\pm$ 8  | 45 $\pm$ 8  |
| Gemcitabine      | 0.01                   | 54 $\pm$ 4                       | 45 $\pm$ 3  | 2 $\pm$ 1   |
| Ru-Ethyl         | 0.05                   | 37 $\pm$ 14                      | 50 $\pm$ 10 | 16 $\pm$ 4  |
|                  | 25                     | 31 $\pm$ 7                       | 42 $\pm$ 7  | 29 $\pm$ 8  |
|                  | 50                     | 29 $\pm$ 7                       | 37 $\pm$ 9  | 36 $\pm$ 9  |
|                  | 0.25                   | 41 $\pm$ 6                       | 39 $\pm$ 4  | 22 $\pm$ 3  |
| <b>1a</b>        | 25                     | 29 $\pm$ 8                       | 43 $\pm$ 10 | 30 $\pm$ 8  |
|                  | 50                     | 30 $\pm$ 4                       | 39 $\pm$ 7  | 33 $\pm$ 10 |
|                  | 2                      | 39 $\pm$ 8                       | 39 $\pm$ 9  | 23 $\pm$ 6  |
| <b>1c</b>        | 12.5                   | 31 $\pm$ 9                       | 45 $\pm$ 12 | 27 $\pm$ 5  |
|                  | 25                     | 32 $\pm$ 4                       | 41 $\pm$ 11 | 29 $\pm$ 10 |

## Osmium

| Compound         | Concentration, $\mu$ M | Cell cycle phase distribution, % |            |             |
|------------------|------------------------|----------------------------------|------------|-------------|
|                  |                        | G1/G0                            | S          | G2/M        |
| Negative control |                        | 43 $\pm$ 5                       | 42 $\pm$ 2 | 18 $\pm$ 4  |
| Etoposide        | 0.1                    | 28 $\pm$ 6                       | 31 $\pm$ 9 | 45 $\pm$ 13 |
| Gemcitabine      | 0.01                   | 53 $\pm$ 8                       | 44 $\pm$ 4 | 4 $\pm$ 1   |
| Os-Ethyl         | 0.05                   | 45 $\pm$ 6                       | 41 $\pm$ 5 | 17 $\pm$ 5  |
|                  | 25                     | 40 $\pm$ 2                       | 45 $\pm$ 9 | 16 $\pm$ 7  |
|                  | 50                     | 43 $\pm$ 3                       | 38 $\pm$ 6 | 22 $\pm$ 6  |
|                  | 0.25                   | 40 $\pm$ 4                       | 46 $\pm$ 5 | 15 $\pm$ 4  |
| <b>2a</b>        | 25                     | 42 $\pm$ 5                       | 39 $\pm$ 6 | 21 $\pm$ 6  |
|                  | 50                     | 42 $\pm$ 3                       | 37 $\pm$ 3 | 23 $\pm$ 3  |
|                  | 2                      | 42 $\pm$ 4                       | 41 $\pm$ 4 | 19 $\pm$ 4  |
| <b>2c</b>        | 12.5                   | 42 $\pm$ 2                       | 39 $\pm$ 7 | 20 $\pm$ 5  |
|                  | 25                     | 42 $\pm$ 5                       | 39 $\pm$ 6 | 21 $\pm$ 5  |

Table S15: Cell cycle phase distribution in SW480 cells upon treatment with test-compounds. Values are presented as means  $\pm$  standard deviations calculated from at least 3 independent experiments. Ru-Ethyl, **1a**, **1c**, Os-Ethyl, **2a** and **2c** were analyzed.

## Ruthenium

| Compound         | Concentration, $\mu\text{M}$ | Cell cycle phase distribution, % |            |             |
|------------------|------------------------------|----------------------------------|------------|-------------|
|                  |                              | G1/G0                            | S          | G2/M        |
| Negative control |                              | 48 $\pm$ 7                       | 38 $\pm$ 5 | 14 $\pm$ 2  |
| Etoposide        | 0.1                          | 29 $\pm$ 8                       | 35 $\pm$ 4 | 37 $\pm$ 10 |
| Gemcitabine      | 0.01                         | 57 $\pm$ 5                       | 41 $\pm$ 6 | 3 $\pm$ 1   |
| Ru-Ethyl         | 0.0125                       | 38 $\pm$ 10                      | 39 $\pm$ 4 | 25 $\pm$ 5  |
|                  | 0.025                        | 28 $\pm$ 8                       | 43 $\pm$ 4 | 30 $\pm$ 6  |
|                  | 0.05                         | 17 $\pm$ 7                       | 50 $\pm$ 8 | 35 $\pm$ 2  |
| <b>1a</b>        | 0.063                        | 31 $\pm$ 6                       | 46 $\pm$ 6 | 26 $\pm$ 1  |
|                  | 0.125                        | 20 $\pm$ 5                       | 51 $\pm$ 9 | 29 $\pm$ 6  |
|                  | 0.25                         | 17 $\pm$ 3                       | 53 $\pm$ 7 | 31 $\pm$ 10 |
| <b>1c</b>        | 0.5                          | 43 $\pm$ 6                       | 42 $\pm$ 4 | 19 $\pm$ 4  |
|                  | 1                            | 34 $\pm$ 7                       | 44 $\pm$ 8 | 25 $\pm$ 4  |
|                  | 2                            | 22 $\pm$ 6                       | 50 $\pm$ 9 | 31 $\pm$ 5  |

## Osmium

| Compound         | Concentration, $\mu\text{M}$ | Cell cycle phase distribution, % |             |            |
|------------------|------------------------------|----------------------------------|-------------|------------|
|                  |                              | G1/G0                            | S           | G2/M       |
| Negative control |                              | 52 $\pm$ 6                       | 37 $\pm$ 4  | 15 $\pm$ 1 |
| Etoposide        | 0.1                          | 35 $\pm$ 5                       | 40 $\pm$ 10 | 28 $\pm$ 8 |
| Gemcitabine      | 0.01                         | 62 $\pm$ 9                       | 37 $\pm$ 9  | 3 $\pm$ 2  |
| Os-Ethyl         | 0.0125                       | 51 $\pm$ 4                       | 38 $\pm$ 4  | 15 $\pm$ 2 |
|                  | 0.025                        | 50 $\pm$ 6                       | 37 $\pm$ 6  | 15 $\pm$ 2 |
|                  | 0.05                         | 50 $\pm$ 3                       | 39 $\pm$ 4  | 15 $\pm$ 2 |
| <b>2a</b>        | 0.063                        | 49 $\pm$ 4                       | 40 $\pm$ 7  | 15 $\pm$ 4 |
|                  | 0.125                        | 49 $\pm$ 4                       | 37 $\pm$ 6  | 16 $\pm$ 2 |
|                  | 0.25                         | 50 $\pm$ 4                       | 35 $\pm$ 7  | 19 $\pm$ 2 |
| <b>2c</b>        | 0.25                         | 49 $\pm$ 4                       | 38 $\pm$ 7  | 17 $\pm$ 2 |
|                  | 0.5                          | 50 $\pm$ 4                       | 38 $\pm$ 4  | 16 $\pm$ 4 |
|                  | 1                            | 52 $\pm$ 4                       | 36 $\pm$ 5  | 17 $\pm$ 6 |

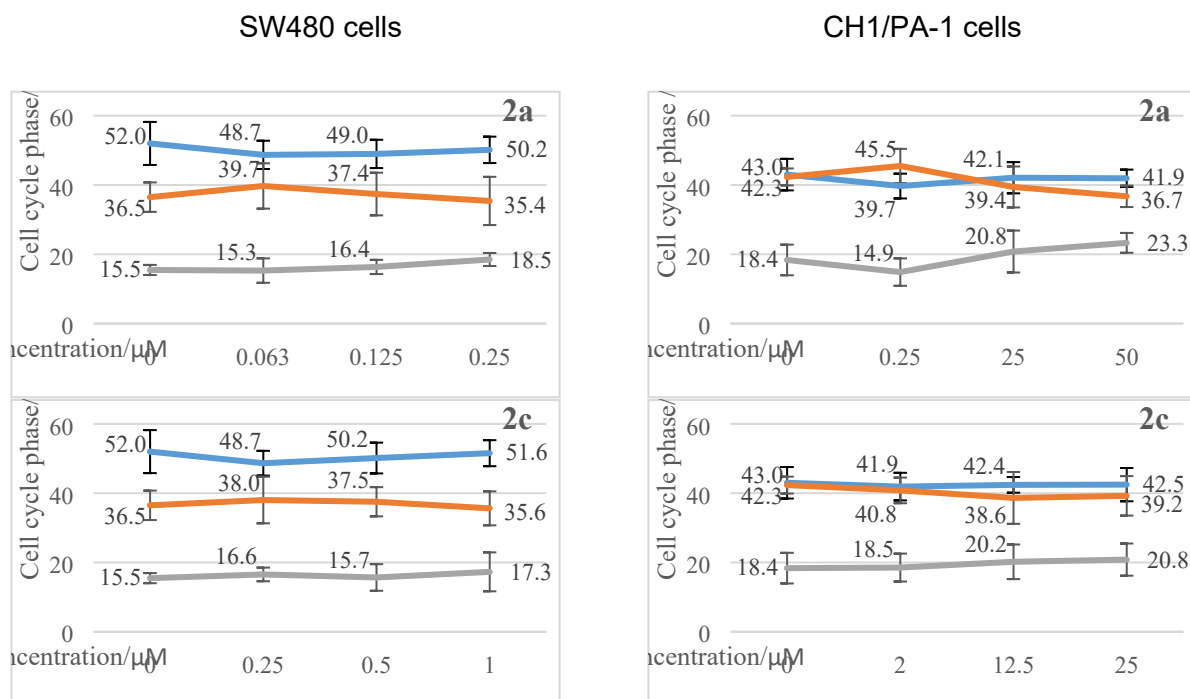

Figure S621: Cell cycle distribution in SW480 colon cancer cells (left) and CH1/PA-1 ovarian cancer (right) cells upon 24 h exposure osmium complexes **2a** and **2c**.

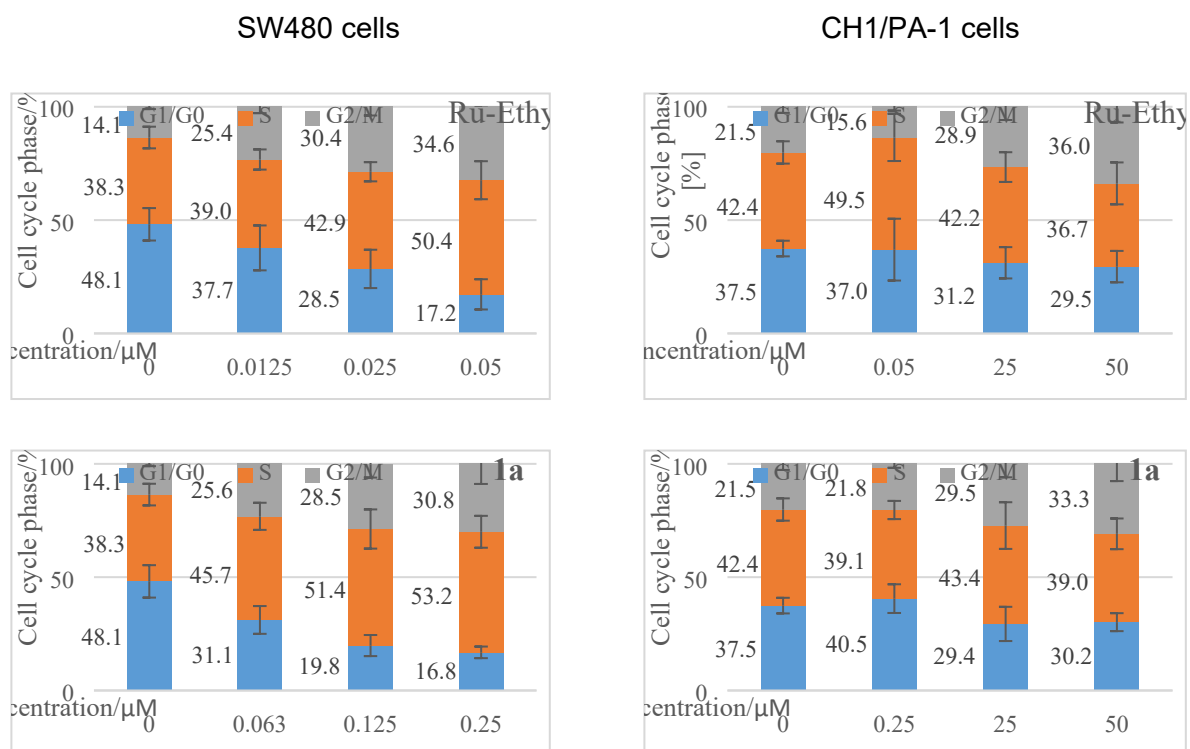

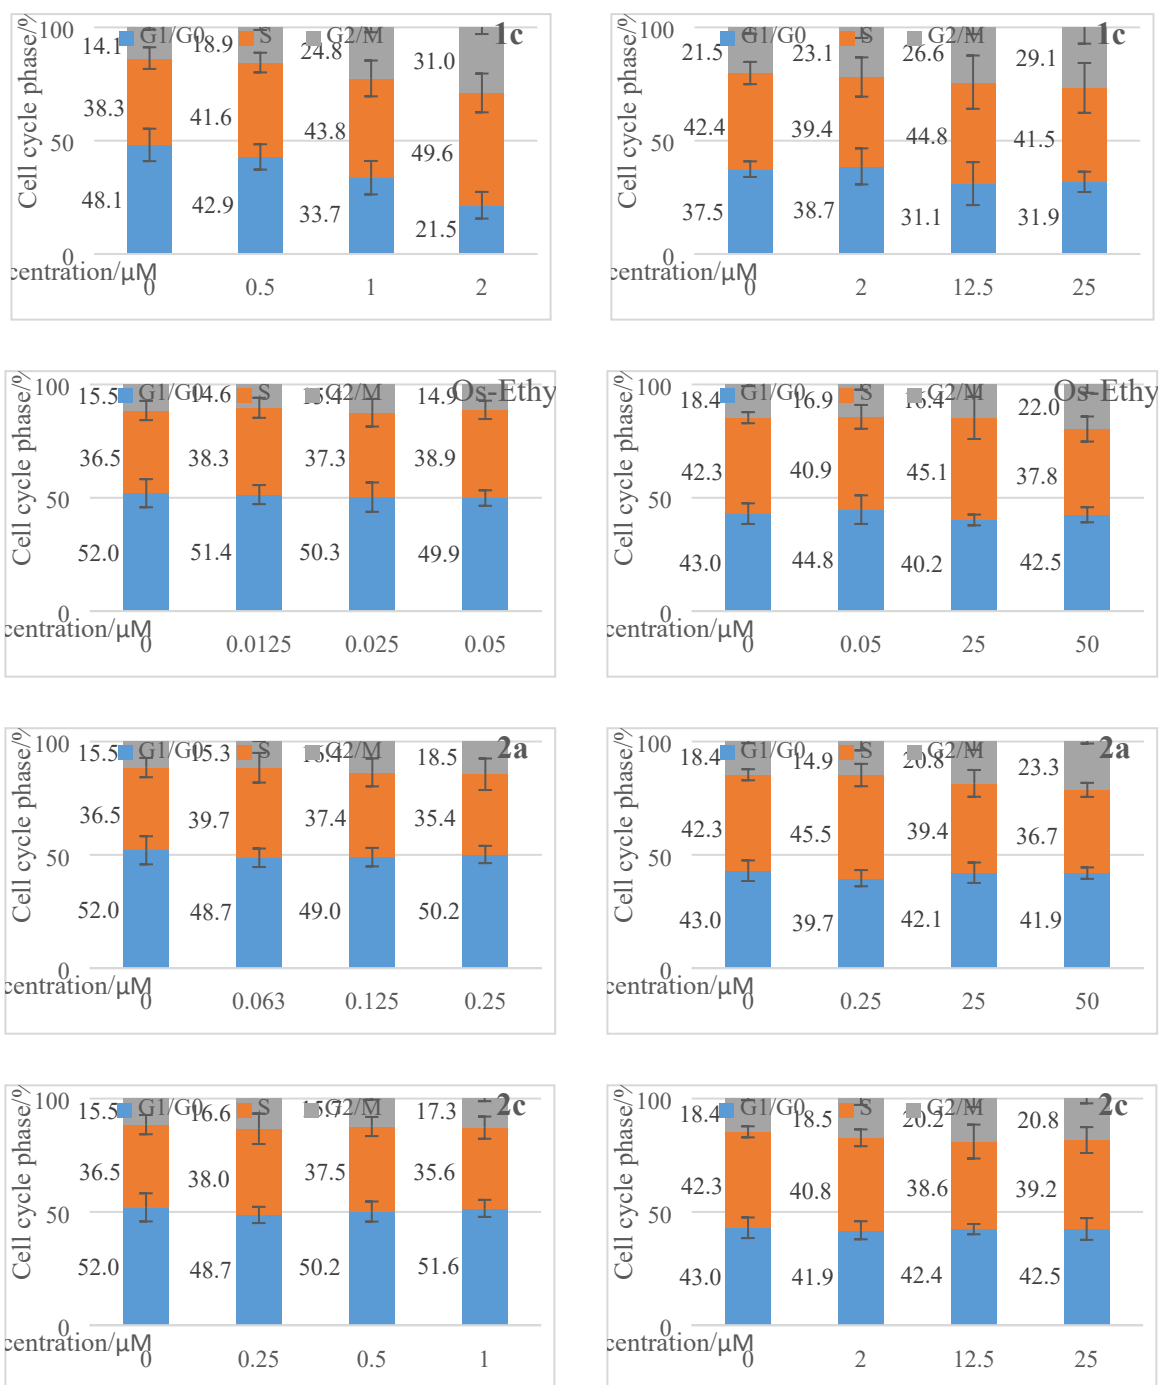

Figure S63: Cell cycle distribution in SW480 colon cancer cells (left) and CH1/PA-1 ovarian cancer (right) cells upon 24 h exposure of complexes Ru-Ethyl, **1a**, **1c**, Os-Ethyl, **2a** and **2c**.
